# Supplementary material for: Genes targeted by the Hedgehog-signaling pathway can be regulated by Estrogen related receptor β
Source: PubMed Central journal article supplement (PMC4657266; doi:10.1186/s12867-015-0047-3), 2015-11-23
Supplement: 12867_2015_47_MOESM1_ESM.pdf [file 12867_2015_47_MOESM1_ESM.pdf]

**Supplement Table 1. Known Hh-signaling pathway target genes**

| Reference Title                                       | Experiment Method                                                                       | Upregulated genes(Log <sub>2</sub> Fold change >1) | Downregulated genes (Log <sub>2</sub> Fold change <-1) |
|-------------------------------------------------------|-----------------------------------------------------------------------------------------|----------------------------------------------------|--------------------------------------------------------|
| Sonic Hedgehog-responsive Genes in the Fetal Prostate | Species: mouse<br>Tissue type: UGS cells<br>Method: Microarray<br>Treatment: Hh peptide | Brak                                               | Dmp1                                                   |
|                                                       |                                                                                         | Dner                                               | mmp13                                                  |
|                                                       |                                                                                         | Gli1                                               | wdr61                                                  |
|                                                       |                                                                                         | Fgf5                                               | sufu                                                   |
|                                                       |                                                                                         | Ptch1                                              | fkbp1a                                                 |
|                                                       |                                                                                         | Rasl11b                                            | atg121                                                 |
|                                                       |                                                                                         | Map3k12                                            | 4930523c07rik                                          |
|                                                       |                                                                                         | Cd24a                                              | rgs4                                                   |
|                                                       |                                                                                         | Timp3                                              | cxcl14                                                 |
|                                                       |                                                                                         | Cldn2                                              | loc544932                                              |
|                                                       |                                                                                         | Ccdc3                                              | adam12                                                 |
|                                                       |                                                                                         | angpt4                                             | tcfcp213                                               |
|                                                       |                                                                                         | hsd11b1                                            | clca1                                                  |
|                                                       |                                                                                         | camk1d                                             | clca2                                                  |
|                                                       |                                                                                         | tnmd                                               | au022121                                               |
|                                                       |                                                                                         | rrm2b                                              | cx3cl1                                                 |
|                                                       |                                                                                         | smoc2                                              | tnfaip6                                                |
|                                                       |                                                                                         | vldlr                                              | nr1h4                                                  |
|                                                       |                                                                                         | lgi2                                               | kremen1                                                |
|                                                       |                                                                                         | 5133400d11rik                                      | spdy1                                                  |
|                                                       |                                                                                         | foxd1                                              |                                                        |
|                                                       |                                                                                         | cdc14a                                             |                                                        |
|                                                       |                                                                                         | al024069                                           |                                                        |
|                                                       |                                                                                         | slc6a6                                             |                                                        |
|                                                       |                                                                                         | stxbp6                                             |                                                        |
|                                                       |                                                                                         | artn                                               |                                                        |
|                                                       |                                                                                         | ksr                                                |                                                        |
|                                                       |                                                                                         | steap4                                             |                                                        |
|                                                       |                                                                                         | tmem69                                             |                                                        |
|                                                       |                                                                                         | rbpms                                              |                                                        |
|                                                       |                                                                                         | serpinb9b                                          |                                                        |
|                                                       |                                                                                         | 1700080016rik                                      |                                                        |
|                                                       |                                                                                         | fbn2                                               |                                                        |
|                                                       |                                                                                         | id4                                                |                                                        |
|                                                       |                                                                                         | igfbp3                                             |                                                        |
|                                                       |                                                                                         | pde9a                                              |                                                        |
|                                                       |                                                                                         | trib2                                              |                                                        |
|                                                       |                                                                                         | prdm8                                              |                                                        |
|                                                       |                                                                                         | gpr73                                              |                                                        |
|                                                       |                                                                                         | efnb2                                              |                                                        |
| ntrk3                                                 |                                                                                         |                                                    |                                                        |
| scara5                                                |                                                                                         |                                                    |                                                        |
| 4933425f03rik                                         |                                                                                         |                                                    |                                                        |
| fbim1                                                 |                                                                                         |                                                    |                                                        |
| slitrk6                                               |                                                                                         |                                                    |                                                        |
| uchl3                                                 |                                                                                         |                                                    |                                                        |
| tiam1                                                 |                                                                                         |                                                    |                                                        |
| igfbp6                                                |                                                                                         |                                                    |                                                        |
| slc7a12                                               |                                                                                         |                                                    |                                                        |
| fa2h                                                  |                                                                                         |                                                    |                                                        |
| mr1                                                   |                                                                                         |                                                    |                                                        |
| plxna2                                                |                                                                                         |                                                    |                                                        |
| plod2                                                 |                                                                                         |                                                    |                                                        |
| hes1                                                  |                                                                                         |                                                    |                                                        |

|                               |                                |                         |          |
|-------------------------------|--------------------------------|-------------------------|----------|
|                               |                                | rbm24                   |          |
|                               |                                | loc3808431110007a.l3rik |          |
|                               |                                | gpt2                    |          |
|                               |                                | fmol                    |          |
|                               |                                | spag9                   |          |
|                               |                                | rrm2b                   |          |
|                               |                                | lhfp                    |          |
|                               |                                | sos1                    |          |
|                               |                                | amisyn                  |          |
|                               |                                | fads2                   |          |
|                               |                                | scarb1                  |          |
| Genome-Wide Screening Reveals | Species: human                 | KRT20                   | RPP40    |
| an EMT Molecular Network      | Tissue type: AsPC-1 cell       | KLK7                    | PCBD2    |
| Mediated by Sonic Hedgehog-   | Method: Microarray             | EMP1                    | HSD17B6  |
| Glil Signaling in Pancreatic  | Treatment: Glil overexpression | EGR3                    | MTHFD2L  |
| Cancer Cells                  |                                | DUSP5                   | C1orf59  |
|                               |                                | GPA33                   | HCG18    |
|                               |                                | UCA1                    | PTPN2    |
|                               |                                | IL8                     | OGFRL1   |
|                               |                                | CST6                    | GPR44    |
|                               |                                | IER3                    | PRICKLE1 |
|                               |                                | CAV1                    | AGMAT    |
|                               |                                | LGALS1                  | C9orf86  |
|                               |                                | TSPAN1                  | CFL2     |
|                               |                                | S100A4                  | CDK6     |
|                               |                                | NRG1                    | SLC16A9  |
|                               |                                | CLIC5                   | NPEPL1   |
|                               |                                | WNT5A                   | SOLH     |
|                               |                                | MALAT1                  | SCLY     |
|                               |                                | ANKRD22                 | PIF      |
|                               |                                | MALL                    | MSI2     |
|                               |                                | AHNAK2                  | TRPS1    |
|                               |                                | RGS14                   | C9orf122 |
|                               |                                | ALOX5                   | PNO1     |
|                               |                                | EGR1                    | HPGD     |
|                               |                                | MIR21                   | SLC39A12 |
|                               |                                | ALDH3A1                 | MCM4     |
|                               |                                | TNFRSF12A               | PIGW     |
|                               |                                | CEACAM6                 | STX3     |
|                               |                                | S100A6                  | KIT      |
|                               |                                | CADPS                   | SESN1    |
|                               |                                | FOS                     | CTPS     |
|                               |                                | IL33                    | SLC1A3   |
|                               |                                | BIRC3                   | G3BP2    |
|                               |                                | CHI3L1                  | STRADB   |
|                               |                                | HIST1H4C                | FOLH1    |
|                               |                                | ATAD2                   | SRM      |
|                               |                                | ATF3                    | B3GALNT1 |
|                               |                                | SCARA3                  | SEC61A1  |
|                               |                                | CTTN                    | TMEM87A  |
|                               |                                | CYR61                   | TMEM5    |
|                               |                                | TIMP3                   | SKP2     |
|                               |                                | S100A2                  | RPL27A   |
|                               |                                | AKR1C2                  | PTGS2    |
|                               |                                | AKR1C3                  | ADK      |
|                               |                                | SDC4                    | CRTAM    |
|                               |                                | ARL4C                   | PAH      |
|                               |                                | HIVEP2                  | ING3     |
|                               |                                | PLAUR                   | HUS1     |
|                               |                                | HEPH                    | C1QTNF3  |
|                               |                                | KRT80                   | KCNJ8    |

|              |               |
|--------------|---------------|
| ITGB6        | DIRAS2        |
| SIX4         | KBTBD8        |
| CEP110       | AMACR/C1QTNF3 |
| KLF9         | CHST13        |
| LRRC1        | TPK1          |
| KTN1         | TDO2          |
| TIMP1        | SMOC2         |
| TIMP2        | KITLG         |
| C19orf33     | RBM8A         |
| SPRR3        |               |
| SLC16A5      |               |
| ARL14        |               |
| SYT17        |               |
| SERPINB5     |               |
| KLK1         |               |
| SPINK4       |               |
| ITGA3        |               |
| RRAS         |               |
| NR1D2        |               |
| TOX2         |               |
| KLK10        |               |
| C2orf68      |               |
| TNC          |               |
| TGFBR3       |               |
| FAM119A      |               |
| ENPP5        |               |
| TGFB2        |               |
| LOC100129105 |               |
| NEURL1B      |               |
| KLK4         |               |
| KLRC1/2      |               |
| ITPKB        |               |
| ANG          |               |
| RNASE4       |               |
| NCRNA00173   |               |
| DUSP6        |               |
| SCD          |               |
| FAM100B      |               |
| PLEKHA8      |               |
| JDP2         |               |
| GPRC5A       |               |
| GBP3         |               |
| NAB2         |               |
| MAFF         |               |
| GSDMB        |               |
| S100A14      |               |
| RPL31        |               |
| IER5L        |               |
| FOXO1        |               |
| ZMIZ1        |               |
| IDS          |               |
| SAT1         |               |
| MYADM        |               |
| RHOU         |               |
| H1FO         |               |
| GADD45B      |               |
| ANXA6        |               |
| QSOX1        |               |
| ABCC3        |               |
| ID3          |               |
| NFAT5        |               |

GDA  
RASA4  
MSX2  
IGFBP6  
PTPRF  
SPRY4  
UACA  
HISPPD2A  
SELENBP1  
IGFL2  
PSMB9  
TNNT1  
SGOL2  
HES1  
ZFP36  
KLK11  
MT1F  
FOXQ1  
TFPI  
KLF13  
CMPK1  
EXT2  
AHNAK  
KLRC3  
TM4SF1  
RAB27B  
KLF12  
MIDN  
BHLHE41  
KLF6  
TNFAIP8L1  
METTL7A  
AKR1C1  
HOXC6  
JHDM1D  
PRAGMIN  
IL17RD  
S100A11  
IL27RA  
HOXB5  
LY6G6D  
IL18  
MST1R  
NEO1  
Clorf116  
KLRK1  
EGFR  
LFNG  
BCL2  
IRS1  
CA12  
ABCG1  
TMCC3  
SERTAD2  
APOBEC3B  
MED13L  
MT1X  
LAMB3  
VEGFA  
OVOL1  
GJA3

CASC5  
DBP  
IQGAP3  
SYTL2  
GAS2L3  
PDGFA  
TFF1  
RIN2  
FAM110C  
C1orf133  
PTTG3  
ID2  
GSTA4  
RPS6KA3  
TBX3  
C20orf112  
ANKRD57  
SAP30L  
CSRNP1  
RAB8B  
CCNG2  
TGOLN2  
RHEBL1  
DUSP4  
EIF5A2  
SERTAD4  
TRIM15  
MT1E/1H/1M  
GNAL  
MT2A  
CLMN  
OVOS/OVOS2  
SOX13  
PPARGC1A  
TRIP10  
PCDH7  
ETV5  
MKI67  
SOX4  
FAM43A  
CAPRIN2  
YPEL5  
LIF  
TMEM49  
ENDOD1  
CAV2  
LDLR  
SFXN3  
ARHGAP29  
MT1H  
EPS8L3  
IQGAP2  
ATP9A  
C17orf61  
ECL6  
CD59  
SFRS18  
C14orf4  
MACF1  
KDM5B  
EPHB6

SPRED1  
 KLF5  
 PAM  
 ID1  
 SBF2  
 ARHGAP28  
 KLK6  
 MICAL2  
 ANXA1  
 TNIK  
 ZDHHC3  
 SCG5  
 C7orf41  
 SEPP1  
 IGF1R  
 IFITM1  
 CTSB  
 PTK6  
 NUDT4  
 CD97  
 PLAU  
 POLD4  
 PPM1A  
 TNS4  
 AK7  
 PTTG1  
 HRCT1  
 SGPP2  
 PDK4  
 PTCH1  
 ZSWIM6  
 SERPINA1  
 EFHD2  
 ITGB4  
 LPHN1  
 PITPNM3  
 C5  
 UNC84B  
 FAM131B  
 MLLT6  
 FOXN3  
 CDC2L6  
 ZFHX3  
 C11orf70  
 ATP6V1C2

|                                                                                        |                                                                                                                                                                                                                                                 |                                               |                               |
|----------------------------------------------------------------------------------------|-------------------------------------------------------------------------------------------------------------------------------------------------------------------------------------------------------------------------------------------------|-----------------------------------------------|-------------------------------|
| Shh signaling is essential for rugae morphogenesis in mice                             | Species: mouse<br>Tissue type: palatal shelves of embryos dissected from pregnant mice one-day post<br>Method: Microarray<br>Treatment: Shh antibody arresting<br>Note: "upregulated genes" in this group are Shh arresting downregulated genes | sostdcl                                       | shh<br>axin2<br>dkk1<br>gata3 |
| The GLI genes as the molecular switch in disrupting Hedgehog signaling in colon cancer | Species: human<br>Tissue type: HT29 cells<br>Treatment: GANT61<br>Note: "upregulated genes" in this                                                                                                                                             | TYMS<br>TK1<br>TOP2A<br>RRM1<br>RRM2<br>PRPS2 |                               |

POLE  
 POLE2  
 POLA1  
 POLA2  
 POLQ  
 E2F2  
 CDT1  
 PRIM1  
 GMNN  
 RFC2  
 RFC3  
 RFC4  
 RFC5  
 H2AFX  
 MDC1  
 BRCA1  
 FANCD2  
 BARD1  
 CDC45L  
 DDIT2  
 DDIT3  
 DDIT4  
 PPP1R15A  
 PCNA  
 ATF3  
 RAD51  
 RAD51C  
 RAD54B  
 RAD54L  
 FEN1  
 MSH6  
 KIAA0101  
 UNG  
 LIG1  
 EXO1  
 HELLS

|                                                                                                                                                                            |                                   |               |               |
|----------------------------------------------------------------------------------------------------------------------------------------------------------------------------|-----------------------------------|---------------|---------------|
| Ablation of Indian Hedgehog in the Murine Uterus Results in Decreased Cell Cycle Progression, Aberrant Epidermal Growth Factor Signaling, and Increased Estrogen Signaling | Species: mouse                    | 1110064A23Rik | 1110001D15Rik |
|                                                                                                                                                                            | Method: Microarray                | 1700010B09Rik | 1190002H23Rik |
|                                                                                                                                                                            | treatment: IHH ablation           | 2810417H13Rik | 1190002H23Rik |
|                                                                                                                                                                            | Note: "upregulated genes" in this | 4930413G21Rik | A2m           |
|                                                                                                                                                                            |                                   | 4930413G21Rik | Abi3bp        |
|                                                                                                                                                                            |                                   | 4930426I24Rik | Accn1         |
|                                                                                                                                                                            |                                   | 4930556L07Rik | Adamdec1      |
|                                                                                                                                                                            |                                   | Acta1         | Akr1c14       |
|                                                                                                                                                                            |                                   | Amhr2         | Ano4          |
|                                                                                                                                                                            |                                   | Amhr2         | Aox3          |
|                                                                                                                                                                            |                                   | Angptl7       | Aqp5          |
|                                                                                                                                                                            |                                   | Anln          | Arg2          |
|                                                                                                                                                                            |                                   | Asl           | Arg2          |
|                                                                                                                                                                            |                                   | Aspm          | Aspg          |
|                                                                                                                                                                            |                                   | Atf4          | BB144871      |
|                                                                                                                                                                            |                                   | AU024342      | BC048679      |
|                                                                                                                                                                            |                                   | Aurka         | Bex1          |
|                                                                                                                                                                            |                                   | AW548124      | Car3          |
|                                                                                                                                                                            |                                   | Birc5         | Ccl28         |
|                                                                                                                                                                            |                                   | Bub1          | Cd36          |
|                                                                                                                                                                            | Ccna2                             | Cd36          |               |
|                                                                                                                                                                            | Ccna2                             | Chga          |               |
|                                                                                                                                                                            | Ccnb1                             | Cica3         |               |
|                                                                                                                                                                            | Ccnb1                             | containing    |               |
|                                                                                                                                                                            | Ccnb2                             | Cpm           |               |

|          |              |
|----------|--------------|
| Ccne2    | Cxcl14       |
| Cdc20    | Fos          |
| Cdc2a    | Gdpd3        |
| Cdca3    | Gem          |
| Cdca8    | Gstm7        |
| Cdca8    | Gulo         |
| Cdca8    | H2-T23       |
| Cenpa    | Hba-a1       |
| Cenpe    | Hbb-b1       |
| Cenpf    | Iapp         |
| Centd2   | Iapp         |
| Cep55    | Iapp         |
| Cks2     | Inhbb        |
| Cks2     | Inmt         |
| Cspg2    | Krt85        |
| cycle    | Len2         |
| cycle    | Mfsd4        |
| Cyplb1   | Mitf         |
| Dleu7    | Moxd1        |
| Dll4     | Myb          |
| Ect2     | Myo3b        |
| Eno4     | Olfm4        |
| Figl1    | Oxtr         |
| Fst      | P2ry14       |
| Fst      | Pamr1        |
| Gli1     | Papers       |
| Hras1s   | Prlr         |
| Hsd17b3  | Prlr         |
| Il13ra2  | Rab6b        |
| Irg1     | Rbm39        |
| Kcnd3    | regeneration |
| Kif11    | Ror2         |
| Kif20a   | Sord         |
| Kif23    | Sox9         |
| Maob     | Spink3       |
| Mcm2     | Tgfb1        |
| Mcm3     | Tgfb1        |
| Mcm5     | Tgfb1        |
| Mcm5     | Tgfb1        |
| Mcm6     | Transcribed  |
| MGC73635 | Transcribed  |
| Mki67    | Wnt4         |
| Mtap2    |              |
| Ncapd2   |              |
| Ncapg    |              |
| Ndp      |              |
| Nek2     |              |
| Nt5dc2   |              |
| Nuf2     |              |
| Nusap1   |              |
| Papers   |              |
| Papers   |              |
| Pbk      |              |
| Pcsk5    |              |
| Pcsk5    |              |
| Pkdcc    |              |
| Plk1     |              |
| Prcl     |              |
| Ptch1    |              |
| Ptch2    |              |
| Pthr1    |              |



GLI2 Knockdown Using an Antisense Oligonucleotide Induces Apoptosis and Chemosensitizes Cells to Paclitaxel in Androgen-Independent Prostate Cancer

Species: human  
 Tissue type: PC3 cells  
 Method: Microarray  
 treatment: Gli2 knock down  
 Note: "upregulated genes" in this group are Gli2 knock down downregulated genes

|          |              |
|----------|--------------|
| Racgap1  |              |
| Rad51    |              |
| Rgs2     |              |
| Rrm2     |              |
| Rrm2     |              |
| Shcbp1   |              |
| Slc6a2   |              |
| Smc4     |              |
| Spc25    |              |
| Steap4   |              |
| Stmn1    |              |
| Stmn1    |              |
| Tac2     |              |
| Tacc3    |              |
| Tcf19    |              |
| Thy1     |              |
| Tk1      |              |
| Tmem132c |              |
| Top2a    |              |
| Tpx2     |              |
| Trip13   |              |
| Tssk3    |              |
| Ube2c    |              |
| Uhrf1    |              |
| Unknown  |              |
| Vcan     |              |
| Vgll3    |              |
| Vgll3    |              |
| Vit      |              |
| Wfdc1    |              |
| ACOT7    | BMF          |
| ANO10    | BMF          |
| APBA3    | C9orf72      |
| BCL2L1   | C9orf72      |
| BCL2L1   | CCDC17       |
| CASC4    | CCDC17       |
| CASC4    | CDKN1A       |
| CCNY     | CDKN1A       |
| CCNY     | CTIF         |
| CMTM4    | CXCL13       |
| COG5     | CYLC2        |
| DDR2     | DDIT3; FUS   |
| ENOSF1   | DEGS1        |
| ENOSF1   | FLJ44342     |
| EXOC4    | FLJ44342     |
| FAM155A  | GDF15        |
| FAM168A  | GEM          |
| FAM20C   | HOXD3        |
| FMNL3    | HPN          |
| FMNL3    | IFITM1       |
| FNDCC3B  | IL24         |
| FNDCC3B  | KRT82        |
| GALNT18  | LINC01094    |
| HOXB13   | LINC01094    |
| IPO8     | LOC100132319 |
| ITFG3    | LOC101929239 |
| KCNMA1   | LOC101929239 |
| KHK      | NR3C1        |
| KHK      | PKD2L2       |
| LMO2     | PLSCR1       |
| MSI2     | PMAIP1       |

MYLK  
 MYLK  
 NPAS2  
 NPR3  
 NPR3  
 NRG2  
 PALD1  
 PPFIA1  
 PPFIA1  
 PREX1  
 PRR16  
 RNFT2  
 RUND1  
 RUND1  
 SEMA4F  
 SIPA1L3  
 SLITRK3  
 SLITRK3  
 SORL1  
 SUPT3H  
 SUPT3H  
 TBC1D19  
 WDR70  
 WDR70  
 WDR76  
 ZNF124  
 ZNF185  
 ZNF185

PPP1R15A  
 PTPRG  
 PYGM  
 RSAD2  
 SPESP1  
 SPRR1A  
 STC2  
 TDRD7  
 TDRD7  
 TMOD4  
 TMOD4  
 YOD1  
 ZCCHC8

|                                                                                                    |                                 |                 |                 |
|----------------------------------------------------------------------------------------------------|---------------------------------|-----------------|-----------------|
| Hedgehog inhibition prolongs survival in a genetically engineered mouse model of pancreatic cancer | Species: human                  | C3orf14         | DHDH            |
|                                                                                                    | Tissue type: HPNE-Gli1 (IC3B10) | HEPH            | NUFIP1          |
|                                                                                                    | Method: Microarray              | ENST00000375284 | TNC             |
|                                                                                                    | Treatment: Gli1 overexpression  | AGT             | FTSJ3           |
|                                                                                                    |                                 | AGT             | SLC2A9          |
|                                                                                                    |                                 | AGT             | PRKCBP1         |
|                                                                                                    |                                 | AGT             | C2Oorf42        |
|                                                                                                    |                                 | AGT             | SETD6           |
|                                                                                                    |                                 | AGT             | AK092668        |
|                                                                                                    |                                 | RGC32           | EXOSC4          |
|                                                                                                    |                                 | AGT             | NOLC1           |
|                                                                                                    |                                 | SERTAD4         | GLDN            |
|                                                                                                    |                                 | CDKN1C          | DMKN            |
|                                                                                                    |                                 | AGT             | AF247042        |
|                                                                                                    |                                 | LYPD1           | LIMS3           |
|                                                                                                    |                                 | ENST00000357303 | SCUBE2          |
|                                                                                                    |                                 | AK125162        | THC2284350      |
|                                                                                                    |                                 | TRPA1           | A_24_P587621    |
|                                                                                                    |                                 | AGT             | PAGE1           |
|                                                                                                    |                                 | AGT             | ENST00000369797 |
|                                                                                                    |                                 | BX248748        | MGC4294         |
|                                                                                                    |                                 | RORB            | POLR1B          |
|                                                                                                    |                                 | THC2330271      | ACCN2           |
|                                                                                                    |                                 | ENST00000371528 | TTC29           |
|                                                                                                    |                                 | NPFFR2          | PITPNC1         |
|                                                                                                    |                                 | SLC7A14         | PLA2G3          |
|                                                                                                    |                                 | FLJ37228        | THC2263651      |
|                                                                                                    |                                 | ENST00000367013 | ENST00000356931 |
|                                                                                                    | NPFFR2                          | PDSS1           |                 |
|                                                                                                    | ENST00000366569                 | FMOD            |                 |
|                                                                                                    | ATP1A2                          | KCNJ15          |                 |
|                                                                                                    | ACTG2                           | GIMAP5          |                 |
|                                                                                                    | LYPD1                           | IPO4            |                 |

|                 |                 |
|-----------------|-----------------|
| DENND2A         | C2orf35         |
| ADRA1B          | LYN             |
| WFDC1           | EPB41L1         |
| RGC32           | ODZ4            |
| MFAP4           | HHIP            |
| ENST00000367012 | TMOD1           |
| ANXA3           | LYN             |
| SIRPA           | DPH2            |
| RP1-93H18.5     | F2RL2           |
| ADARB1          | HK2             |
| BHMT2           | AA714039        |
| CR605298        | LYN             |
| ZNF610          | A_23_P170719    |
| TRAM1L1         | LYN             |
| ENST00000371256 | LOC92312        |
| SAA1            | VSNL1           |
| SDS             | DCBLD2          |
| HTRA3           | PRSS3           |
| SELENBP1        | LYN             |
| SLC7A14         | TNNI3           |
| CCRK            | AKO24680        |
| ENST00000366930 | C9orf58         |
| DENND2A         | LYN             |
| MAGEA2B         | KRTAP1-5        |
| NPY2R           | C18orf50        |
| TSPY2           | WDR3            |
| LZTS1           | METTL7B         |
| DMGDH           | WDR3            |
| THC2314822      | LOC441461       |
| EREG            | LYN             |
| CNN1            | HAVCR1          |
| EPHB4           | ANGPTL4         |
| AL832540        | LYN             |
| GSTM3           | THC2283371      |
| BOK             | AF116675        |
| SAA2            | LYN             |
| LAMA5           | LRRC17          |
| SLITRK6         | EPB41L1         |
| NRXN1           | IL12RB2         |
| AI470277        | LYN             |
| BHMT2           | ENST00000339446 |
| ENST00000321925 | COLEC11         |
| C10orf10        | BCO38983        |
| DMN             | SMOC1           |
| TMEM130         | ZNF334          |
| TNFRSF11B       | SERPINB2        |
| TP53I11         | AKR1B10         |
| GSTM3           | A_23_P111766    |
| CSTA            | RPL22L1         |
| DPP4            | HSPC111         |
| W04231          | FOLR3           |
| TP53I11         | PEO1            |
| EDN1            | EDG8            |
| EDN1            | EDG8            |
| FLJ34515        | SLC6A15         |
| EDN1            | KIAA0690        |
| EDN1            | PAPPA2          |
| CKB             | C21orf34        |
| THBS1           | THC2274524      |
| EDN1            | LAMA1           |
| XAGE2           | COL14A1         |

|                 |                 |
|-----------------|-----------------|
| THBS1           | PLAC8           |
| EDN1            | POLR1B          |
| EDN1            | LOC391403       |
| EDN1            | OXGR1           |
| ECHDC2          | BC018675        |
| EDN1            | DPYSL4          |
| THBS1           | RDM1            |
| AK001966        | CTSH            |
| TIAM2           | SPHK1           |
| EDN1            | ZNF179          |
| THC2435731      | PEO1            |
| KIF26B          | PTPRE           |
| THBS1           | DCBLD2          |
| FOXF1           | IL22RA1         |
| ST6GAL1         | AKAP12          |
| THBS1           | TMEM46          |
| CSTA            | THC2279790      |
| THBS1           | LOC401131       |
| THBS1           | THC2379144      |
| THBS1           | KBTD11          |
| THBS1           | PRSS2           |
| MAGEA4          | ENST00000383097 |
| MAGEA6          | NIPSNAP1        |
| THBS1           | A_32_P167212    |
| CES1            | PTPN22          |
| FLJ14213        | SLC35F2         |
| MAGEA6          | BM129308        |
| BE786351        | BC033829        |
| PLEKHA6         | CPEB1           |
| CLEC3B          | AKAP12          |
| MAGEA6          | IFNE1           |
| LOC387895       | IL23R           |
| EX373237        | LPHN3           |
| COL11A1         | ZDHC11          |
| CHRM3           | ARG2            |
| D4S234E         | CFI             |
| TNFRSF11B       | DACH2           |
| MAGEA6          | HLA-DOA         |
| GALNTL2         | ENST00000267857 |
| MAGEA6          | MGC45438        |
| CXCL11          | DACH2           |
| ENST00000343905 | CMYA3           |
| MAGEA6          | LOC400890       |
| MAGEA6          | RPS6KA5         |
| AK001007        | LOC92312        |
| TAGLN           | PRSS2           |
| LOC147710       | ACP5            |
| TGFB2           | HLA-DRB5        |
| MAGEA6          | PECAM1          |
| MAGEA6          | HLA-DPA1        |
| F3              | ZNF659          |
| AL355687        | CR936711        |
| OLFML2A         | HLA-DPA1        |
| GABBR2          | MYOM2           |
| AMZ1            | IFI44L          |
| SPON2           | LAMA1           |
| PLAU            | DPPA2           |
| PLAU            | RSAD2           |
| KCNIP3          | ENST00000272643 |
| ESR2            | GPR103          |
| PLAU            | M27126          |

|                 |                 |
|-----------------|-----------------|
| ESAM            | IMPA2           |
| BC062758        | PTPRE           |
| TNFRSF11B       | KHK             |
| C18orf2         | DHRS9           |
| MYOZ2           | FAM5C           |
| ENST00000382416 | RSAD2           |
| CXCL11          | ENST00000367169 |
| PLAU            | PODXL           |
| PLAU            | RP11-393H10.2   |
| TNFRSF11B       | PXDNL           |
| THC2312468      | HLA-DRB4        |
| PLAU            | MFAP5           |
| THBS1           | ACTR3B          |
| BEXL1           | UGT2B11         |
| PLAU            | FLJ20581        |
| MAGEA6          | AX721193        |
| PLAU            | ANXA10          |
| TNFRSF11B       | STK33           |
| PLAU            | THC2374814      |
| CXCL10          | CFI             |
| AV707592        | SYT13           |
| PLAU            | GPR30           |
| ENST00000376752 | SLAMF1          |
| ChGn            | FAM78A          |
| ALDOC           | SLAMF7          |
| TNFRSF11B       | SEPP1           |
| BF213738        | TMPRSS11E       |
| SKIP            | BC043411        |
| KENAE           | THC2440554      |
| TNFRSF11B       | C6orf114        |
| AW949170        | SMOC1           |
| ADAM8           | SLC26A4         |
| THC2314823      | DOCK8           |
| SNED1           | AK125648        |
| C18orf2         | LOC400879       |
| TNFRSF11B       | SPTA1           |
| THC2314600      | SV2B            |
| PPP1R1C         | DA711948        |
| THC2403712      | NFIB            |
| UNC5B           | CITED4          |
| BX538051        | SOHLH2          |
| A_24_P917668    | GALNT12         |
| GREM2           | ENST00000257897 |
| DACT1           | GREB1           |
| EIF4E3          | ZNF447          |
| TNFRSF11B       | NOSTRIN         |
| THC2354272      | ESM1            |
| TNFRSF11B       | CREB5           |
| AF086044        | ENST00000381655 |
| TRPA1           | SULF1           |
| MAGEA12         | AK126405        |
| VMD2            | INPP5D          |
| C10orf10        | ARRB1           |
| CYB5R2          | LGALS9          |
| KCTD14          | C9orf58         |
| ITGB8           | FLJ10324        |
| TNFRSF11B       | DPT             |
| ETS2            | PLP1            |
| SVEP1           | C20orf133       |
| CYP4V2          | SERPING1        |
| C10orf125       | IL13RA2         |

|                 |                |
|-----------------|----------------|
| FOXA1           | RP11-119E20.1  |
| FLJ14213        | CD53           |
| RASL11B         | LOC284998      |
| NEDD9           | A_23_P72014    |
| ENST00000380186 | IL27RA         |
| RHOJ            | PLEKHA7        |
| SNTA1           | OCIAD2         |
| XAGE1           | RHBDF2         |
| CR740121        | CGNL1          |
| CRISPLD2        | FAM105A        |
| PTER            | BG118529       |
| ESR2            | QPR1           |
| BX117479        | NAP1L3         |
| RAB11FIP1       | C2Oorf133      |
|                 | 39329 C10orf58 |
| GALNTL1         | QPR1           |
| SYNC1           | PCSK9          |
| MEST            | UGT2B7         |
| ESR2            | ALDH1A1        |
| KCNJ6           | EGFL11         |
| GRIA3           | MMP1           |
| TNIP3           | FBLN2          |
| PPARGC1A        | MMP1           |
| GBP2            | MMP1           |
| DLL3            | MMP1           |
| DDX43           | MMP1           |
| MGC16121        | RP1-32F7.2     |
| C10orf125       | MMP1           |
| C2Oorf132       | THC2375723     |
| THC2439128      | MMP1           |
| REPS2           | MMP1           |
| EMID1           | MMP1           |
| CRISPLD2        | DENND2D        |
| GRAMD1C         | ICAM2          |
| CEBPD           | THC2355280     |
| FAM49A          | MMP1           |
| CSAG3A          | BG114486       |
| SNTA1           | GCNT3          |
| RAB11FIP4       | TMEM16D        |
| ADORA2B         | AK058065       |
| C1orf198        | FLJ30851       |
| AF035291        | DSC3           |
| SIRPG           | HLA-DMB        |
| TGM2            | IRX3           |
| TCEA3           | SPP1           |
| BAALC           | SPP1           |
| ANGPT1          | DSC3           |
| CYGB            | SPP1           |
| SYNP02          | SPP1           |
| FLJ46385        | SPP1           |
| C1S             | HLA-DRA        |
| BDKRB2          | SPP1           |
| WISP2           | THC2455389     |
| RHOJ            | A_24_P561165   |
| OXTR            | AK093002       |
| SORT1           | SPP1           |
| TPM1            | SPP1           |
| AK027294        | SPP1           |
| GLI1            | SPP1           |
| KIAA0367        | TNFSF7         |
| RNF157          | RYR2           |

|              |                 |
|--------------|-----------------|
| FMR1NB       | FLJ30851        |
| TCEA3        | ENST00000295989 |
| TPM1         | RP1-32F7.2      |
| ARHGAP6      | ECHDC3          |
| RASSF4       | BCAN            |
| PCSK5        | GIMAP2          |
| ANGPT1       | BCL2A1          |
| EDG1         | MAGEC2          |
| AKO94972     | DYDC2           |
| C6orf194     | ATP8A2          |
| ZNF415       | PREX1           |
| STAT5A       | TIE1            |
| TPM1         | DOCK8           |
| THC2285198   | TMEM16D         |
| NNMT         | DOCK8           |
| TUBA1        |                 |
| ADM          |                 |
| ADM          |                 |
| MYLK         |                 |
| SVEP1        |                 |
| LCE3A        |                 |
| ADM          |                 |
| METTL7A      |                 |
| OPLAH        |                 |
| C5orf23      |                 |
| C13orf16     |                 |
| SORT1        |                 |
| WDR66        |                 |
| C20orf132    |                 |
| ADM          |                 |
| GLUL         |                 |
| FOXO1A       |                 |
| PLCL1        |                 |
| CD633154     |                 |
| C20orf175    |                 |
| ADM          |                 |
| DDIT4        |                 |
| DPP7         |                 |
| ADM          |                 |
| ADM          |                 |
| SEMA3B       |                 |
| ADM          |                 |
| ADM          |                 |
| ESR2         |                 |
| BC089451     |                 |
| AA910154     |                 |
| TAGLN        |                 |
| ChGn         |                 |
| ADM          |                 |
| THC2442494   |                 |
| PALLD        |                 |
| BIRC3        |                 |
| CLDN1        |                 |
| C21orf7      |                 |
| A_24_P398370 |                 |
| METTL7A      |                 |
| RORB         |                 |
| BMP2         |                 |
| SIRPA        |                 |
| BDNF         |                 |
| GPR1         |                 |

KIT  
PDE5A  
EDIL3  
FLJ22536  
ZNF594  
PIM1  
B3GALT4  
RHOJ  
BDNF  
EREG  
ETS2  
LOC340061  
RNF128  
MASP1  
ARHGEF5  
AK123483  
ZNF287  
B3GALT4  
Clorf38  
IGF2  
LBH  
C4orf18  
CD9  
LHX6  
RAB4A  
PPAP2B  
DSCR1L1  
DOC1  
CRIM1  
A\_32\_P327750  
THC2364378  
PLK2  
SVEP1  
ENST00000334564  
WISP1  
PCDH18  
LOC144501  
HERC5  
CLEC2B  
CYP27A1  
COL5A1  
A\_24\_P212997  
MUC15  
CD40  
SPECC1  
GRAMD1C  
TXNIP  
THC2411757  
RBMY1B  
ENST00000372234  
FLJ43080  
CYR61  
ABCA13  
IQCG  
CCDC68  
TCEA3  
ESR2  
TPM1  
SPAG8  
AKO94154  
ENPP5



FLJ21075  
 ABCC3  
 BQ379494  
 CALCR  
 KLF9  
 ATF3  
 USP48  
 RBMY1B  
 USP48  
 ENST00000360934  
 MAP4  
 RGS9  
 ECGF1  
 LOC201229  
 MYLK  
 MYH10  
 SLC38A4  
 SOCS2  
 EFNB2  
 TMEM35  
 STC2  
 GARNL4  
 A\_32\_P188127  
 AA292106  
 THC2286259  
 FOXA1  
 LOC652408  
 C11orf70  
 CD40  
 HEPH  
 CD40  
 TP53I11  
 ENST00000380064  
 NRIP3  
 JUB  
 FAM107B  
 TPST1  
 USP48  
 CHRM2

|                                                                           |                                                  |                |                |
|---------------------------------------------------------------------------|--------------------------------------------------|----------------|----------------|
| Molecular Pathways Regulating Pro-migratory Effects of Hedgehog Signaling | Species: mouse                                   | <i>Gli</i>     | <i>Cxcl5</i>   |
|                                                                           | Tissue type: C166 cells                          | <i>Ptch1</i>   | <i>Rgs4</i>    |
|                                                                           | Method: microarray                               | <i>MICAL2</i>  | <i>Atp1b1</i>  |
|                                                                           | Treatment: Hh ligand enriched conditioned medium | <i>Nrp</i>     | <i>Pdk4</i>    |
|                                                                           |                                                  | <i>Klf4</i>    | <i>Ccl7</i>    |
|                                                                           |                                                  | <i>Igf1bp3</i> | <i>Sphk1</i>   |
|                                                                           |                                                  | <i>Slc6a6</i>  | <i>Emb</i>     |
|                                                                           |                                                  | <i>Capn1</i>   | <i>Mep1a</i>   |
|                                                                           |                                                  | <i>Tns</i>     | <i>Nelf</i>    |
|                                                                           |                                                  | <i>Penk1</i>   | <i>Pvt1</i>    |
|                                                                           |                                                  | <i>Tbx18</i>   | <i>Arhu</i>    |
|                                                                           |                                                  | <i>Hspa1b</i>  | <i>Llcam</i>   |
|                                                                           |                                                  |                | <i>Thbs2</i>   |
|                                                                           |                                                  |                |                |
| Lubahn lab unpublished dataset                                            | Species: mouse                                   | <i>Itga6</i>   | <i>Cpne6</i>   |
|                                                                           | Tissue type: TRAMPC2 cells                       | <i>Sorcs2</i>  | <i>Pamr1</i>   |
|                                                                           | Treatment: Hh ligand enriched cc                 | <i>Cp</i>      | <i>Mmpl3</i>   |
|                                                                           | Method: RNAseq                                   | <i>Synm</i>    | <i>Gda</i>     |
|                                                                           |                                                  | <i>Foxo6</i>   | <i>Sprr1a</i>  |
|                                                                           |                                                  | <i>Mtss1</i>   | <i>Smtnl2</i>  |
|                                                                           |                                                  | <i>Cp</i>      | <i>Slc10a6</i> |

|               |         |
|---------------|---------|
| Fzd4          | Mt2     |
| Mycl1         | Sncaip  |
| Sykb          | Fos     |
| Lrrc32        | Fndc1   |
| Epb4.114b     | Rgs4    |
| Grb14         | Agap2   |
| Scara5        | Mmp3    |
| Nsg2          | Kbtbd11 |
| Srpx2         | I1rn    |
| Cyb561        | Stc1    |
| Gas7          | Ppl     |
| Kif26b        | Mt1     |
| Plxna2        | Gatm    |
| Hs3st3b1      |         |
| Cd24a         |         |
| Map3k5        |         |
| Ablim1        |         |
| Ngef          |         |
| Abca1         |         |
| Paqr8         |         |
| Slco4a1       |         |
| Itga9         |         |
| Pkdcc         |         |
| Nhs           |         |
| Fbxo32        |         |
| Pid1          |         |
| Rbm20         |         |
| Gdpd5         |         |
| Angpt4        |         |
| Encl          |         |
| Ras11b        |         |
| Ccdc3         |         |
| Syt13         |         |
| Alpl          |         |
| Fbn2          |         |
| Ace           |         |
| Hes1          |         |
| Perp          |         |
| Bmper         |         |
| Smoc2         |         |
| Enpp1         |         |
| Trp63         |         |
| Foxd1         |         |
| Bcl1b         |         |
| Atp6v0a4      |         |
| Lama5         |         |
| Penk          |         |
| Col15a1       |         |
| Ptch1         |         |
| Smoc1         |         |
| Cldn9         |         |
| Col23a1       |         |
| Igfbp5        |         |
| Kcnd3         |         |
| Tgm5          |         |
| 1810041L15Rik |         |
| Pla2g3        |         |
| Ddit4l        |         |
| Edkrb2        |         |
| Hsd11b1       |         |
| Ptch2         |         |

Gli1  
Cacna2d2

**Supplment2 Result of all pairwise comparisons of differentially expressed genes**

Control vs Hedgehog

| gene         | log2(fold_change) | p_value | q_value | Gene Symbol |
|--------------|-------------------|---------|---------|-------------|
| NM_030206    | inf               | 0.00005 | 0.00089 | Cygb        |
| NM_007902    | inf               | 0.00005 | 0.00089 | Edn2        |
| NM_010296    | 9.14              | 0.00020 | 0.00307 | Gli1        |
| NM_001044751 | 4.40              | 0.00005 | 0.00089 | Hsd11b1     |
| NM_008623    | 3.92              | 0.00230 | 0.02481 | Mpz         |
| NM_008957    | 3.82              | 0.00005 | 0.00089 | Ptch1       |
| NM_013690    | 3.81              | 0.00005 | 0.00089 | Tek         |
| NM_008235    | 3.73              | 0.00005 | 0.00089 | Hes1        |
| NM_001271705 | 3.70              | 0.00005 | 0.00089 | Pgf         |
| NM_016867    | 3.47              | 0.00005 | 0.00089 | Gipc2       |
| NM_001099276 | 3.23              | 0.00005 | 0.00089 | Pik3c2b     |
| NM_177709    | 3.15              | 0.00255 | 0.02711 | Tusc5       |
| NM_025429    | 3.04              | 0.00005 | 0.00089 | Serpinb1a   |
| NM_001177713 | 2.97              | 0.00005 | 0.00089 | Cyp26b1     |
| NM_009117    | 2.92              | 0.00440 | 0.04223 | Saa1        |
| NM_009641    | 2.82              | 0.00005 | 0.00089 | Angpt4      |
| NM_007719    | 2.81              | 0.00005 | 0.00089 | Ccr7        |
| NM_016808    | 2.79              | 0.00005 | 0.00089 | Usp2        |
| NM_009115    | 2.78              | 0.00040 | 0.00567 | S100b       |
| NM_010518    | 2.65              | 0.00005 | 0.00089 | Igfbp5      |
| NM_009437    | 2.64              | 0.00005 | 0.00089 | Tst         |
| NM_001281819 | 2.61              | 0.00005 | 0.00089 | Ace         |
| NM_008380    | 2.57              | 0.00005 | 0.00089 | Inhba       |
| NM_022657    | 2.56              | 0.00005 | 0.00089 | Fgf23       |
| NM_001033633 | 2.46              | 0.00005 | 0.00089 | Slc2a13     |
| NM_001012766 | 2.45              | 0.00005 | 0.00089 | Earl2       |
| NM_010740    | 2.38              | 0.00005 | 0.00089 | Cd93        |
| NM_001177752 | 2.36              | 0.00005 | 0.00089 | Pfkfb3      |
| NM_001285457 | 2.35              | 0.00005 | 0.00089 | Gfra1       |
| NM_139197    | 2.34              | 0.00005 | 0.00089 | Gbgt1       |
| NR_030721    | 2.31              | 0.00005 | 0.00089 | Foxd2os     |
| NM_145356    | 2.26              | 0.00005 | 0.00089 | Zbtb7c      |
| NM_008489    | 2.25              | 0.00005 | 0.00089 | Lbp         |
| NM_001170847 | 2.25              | 0.00005 | 0.00089 | Rbm20       |
| NM_011452    | 2.21              | 0.00005 | 0.00089 | Serpinb9b   |
| NM_009382    | 2.16              | 0.00005 | 0.00089 | Thy1        |
| NM_172671    | 2.15              | 0.00005 | 0.00089 | Lgr4        |
| NM_023734    | 2.14              | 0.00030 | 0.00442 | Pi16        |
| NM_019444    | 2.12              | 0.00005 | 0.00089 | Ramp2       |
| NM_001167680 | 2.11              | 0.00005 | 0.00089 | Rhbdf2      |
| NM_016854    | 2.09              | 0.00005 | 0.00089 | Ppp1r3c     |
| NM_001142952 | 2.07              | 0.00005 | 0.00089 | Fam46c      |
| NM_001164355 | 2.06              | 0.00015 | 0.00240 | Ska1        |
| NM_001145886 | 2.03              | 0.00005 | 0.00089 | Tiam1       |
| NM_007539    | 1.95              | 0.00005 | 0.00089 | Bdkrb1      |
| NM_153137    | 1.95              | 0.00010 | 0.00167 | Traf3ip3    |
| NM_001159518 | 1.91              | 0.00005 | 0.00089 | Igfbp7      |
| NM_001033141 | 1.88              | 0.00060 | 0.00814 | Escr        |
| NM_177343    | 1.87              | 0.00005 | 0.00089 | Camk1d      |
| NM_001127259 | 1.87              | 0.00005 | 0.00089 | Trp63       |
| NM_001168318 | 1.86              | 0.00005 | 0.00089 | Scara5      |
| NM_008737    | 1.85              | 0.00005 | 0.00089 | Nrp1        |
| NM_009548    | 1.84              | 0.00020 | 0.00307 | Rnf112      |
| NM_001195025 | 1.81              | 0.00005 | 0.00089 | Nuak2       |
| NM_007470    | 1.80              | 0.00005 | 0.00089 | Apod        |
| NM_018827    | 1.79              | 0.00005 | 0.00089 | Cr1f1       |
| NM_031168    | 1.79              | 0.00005 | 0.00089 | I16         |

|              |      |         |         |               |
|--------------|------|---------|---------|---------------|
| NM_146149    | 1.77 | 0.00010 | 0.00167 | Fam151a       |
| NM_010517    | 1.76 | 0.00005 | 0.00089 | Igfbp4        |
| NM_018779    | 1.75 | 0.00005 | 0.00089 | Pde3a         |
| NM_001033455 | 1.75 | 0.00005 | 0.00089 | Ccdc27        |
| NM_009931    | 1.73 | 0.00005 | 0.00089 | Col4a1        |
| NM_026778    | 1.72 | 0.00005 | 0.00089 | Cthrc1        |
| NM_172676    | 1.71 | 0.00005 | 0.00089 | Samd10        |
| NM_008593    | 1.71 | 0.00205 | 0.02240 | Foxd2         |
| NM_030172    | 1.71 | 0.00090 | 0.01150 | Efcab11       |
| NM_001033464 | 1.68 | 0.00005 | 0.00089 | Efcab4b       |
| NM_019971    | 1.68 | 0.00005 | 0.00089 | Pdgfc         |
| NM_001199696 | 1.68 | 0.00005 | 0.00089 | Bai2          |
| NM_009860    | 1.66 | 0.00005 | 0.00089 | Cdc25c        |
| NM_008185    | 1.63 | 0.00005 | 0.00089 | Gstt1         |
| NM_181848    | 1.63 | 0.00005 | 0.00089 | Otpn          |
| NM_016851    | 1.62 | 0.00005 | 0.00089 | Irf6          |
| NR_015556    | 1.59 | 0.00005 | 0.00089 | 2610035D17Rik |
| NM_001081085 | 1.58 | 0.00005 | 0.00089 | Sapcd2        |
| NM_025590    | 1.58 | 0.00005 | 0.00089 | Acot11        |
| NM_027930    | 1.58 | 0.00005 | 0.00089 | Mtfr2         |
| NM_011623    | 1.56 | 0.00005 | 0.00089 | Top2a         |
| NM_008055    | 1.56 | 0.00005 | 0.00089 | Fzd4          |
| NR_015456    | 1.54 | 0.00450 | 0.04299 | D7Ertd715e    |
| NM_007805    | 1.53 | 0.00005 | 0.00089 | Cyb561        |
| NM_134072    | 1.51 | 0.00005 | 0.00089 | Akr1c14       |
| NM_001162506 | 1.51 | 0.00005 | 0.00089 | Troap         |
| NM_172564    | 1.51 | 0.00005 | 0.00089 | Tns4          |
| NM_053191    | 1.50 | 0.00005 | 0.00089 | Pi15          |
| NR_033225    | 1.50 | 0.00005 | 0.00089 | Gm13375       |
| NM_172418    | 1.50 | 0.00005 | 0.00089 | Mamstr        |
| NM_013822    | 1.50 | 0.00005 | 0.00089 | Jag1          |
| NM_198423    | 1.49 | 0.00005 | 0.00089 | Bahcc1        |
| NM_033041    | 1.49 | 0.00175 | 0.01972 | Hes7          |
| NM_001081258 | 1.49 | 0.00005 | 0.00089 | Kif14         |
| NM_001163471 | 1.48 | 0.00005 | 0.00089 | Hectd2        |
| NM_001111274 | 1.47 | 0.00005 | 0.00089 | Igf1          |
| NM_001081363 | 1.47 | 0.00005 | 0.00089 | Cenpf         |
| NM_001110265 | 1.47 | 0.00005 | 0.00089 | Ttk           |
| NM_007695    | 1.46 | 0.00005 | 0.00089 | Chil1         |
| NM_001164724 | 1.45 | 0.00005 | 0.00089 | I133          |
| NM_001113460 | 1.45 | 0.00005 | 0.00089 | Tec           |
| NM_001081117 | 1.44 | 0.00005 | 0.00089 | Mki67         |
| NM_146208    | 1.44 | 0.00005 | 0.00089 | Neil3         |
| NM_009932    | 1.44 | 0.00005 | 0.00089 | Col4a2        |
| NM_144799    | 1.43 | 0.00025 | 0.00374 | Lmcd1         |
| NM_009252    | 1.42 | 0.00005 | 0.00089 | Serpina3n     |
| NM_001252055 | 1.42 | 0.00005 | 0.00089 | Ly6c1         |
| NM_029617    | 1.40 | 0.00005 | 0.00089 | Casc5         |
| NM_013538    | 1.39 | 0.00005 | 0.00089 | Cdca3         |
| NM_009320    | 1.39 | 0.00005 | 0.00089 | Slc6a6        |
| NM_001111073 | 1.38 | 0.00005 | 0.00089 | Fxyd5         |
| NM_001081125 | 1.37 | 0.00005 | 0.00089 | Gli2          |
| NM_001177794 | 1.37 | 0.00005 | 0.00089 | Sertad4       |
| NM_027975    | 1.37 | 0.00005 | 0.00089 | Fam83d        |
| NM_001081020 | 1.37 | 0.00005 | 0.00089 | Adamts6       |
| NM_007993    | 1.36 | 0.00005 | 0.00089 | Fbn1          |
| NM_019753    | 1.36 | 0.00005 | 0.00089 | Cdh17         |
| NM_001110162 | 1.35 | 0.00005 | 0.00089 | Cdca2         |
| NM_010637    | 1.35 | 0.00005 | 0.00089 | Klf4          |
| NM_028481    | 1.35 | 0.00015 | 0.00240 | Ccdc18        |
| NM_008209    | 1.34 | 0.00005 | 0.00089 | Mr1           |

|              |      |         |         |           |
|--------------|------|---------|---------|-----------|
| NM_001272057 | 1.34 | 0.00005 | 0.00089 | Adam5     |
| NM_001085549 | 1.34 | 0.00005 | 0.00089 | Trabd2b   |
| NM_176982    | 1.34 | 0.00015 | 0.00240 | Fbxo48    |
| NM_009013    | 1.33 | 0.00005 | 0.00089 | Rad51ap1  |
| NR_001592    | 1.33 | 0.00005 | 0.00089 | H19       |
| NM_028870    | 1.31 | 0.00005 | 0.00089 | Cltb      |
| NM_133687    | 1.31 | 0.00005 | 0.00089 | Cxxc5     |
| NM_008796    | 1.31 | 0.00090 | 0.01150 | Pctp      |
| NM_173762    | 1.30 | 0.00005 | 0.00089 | Cenpe     |
| NM_001032413 | 1.29 | 0.00005 | 0.00089 | Pear1     |
| NM_028705    | 1.29 | 0.00005 | 0.00089 | Herc3     |
| NM_080467    | 1.28 | 0.00005 | 0.00089 | Atp6v0a4  |
| NM_134000    | 1.27 | 0.00155 | 0.01783 | Traf3ip2  |
| NM_013807    | 1.27 | 0.00005 | 0.00089 | Plk3      |
| NM_001042421 | 1.27 | 0.00005 | 0.00089 | Kntc1     |
| NM_026743    | 1.26 | 0.00005 | 0.00089 | Tspan11   |
| NM_009791    | 1.26 | 0.00005 | 0.00089 | Aspm      |
| NM_026613    | 1.26 | 0.00005 | 0.00089 | Ccdc34    |
| NM_008458    | 1.25 | 0.00080 | 0.01038 | Serpina3c |
| NM_013552    | 1.25 | 0.00005 | 0.00089 | Hmmr      |
| NM_172145    | 1.25 | 0.00005 | 0.00089 | Evalb     |
| NM_028829    | 1.25 | 0.00005 | 0.00089 | Paqr8     |
| NM_001159369 | 1.25 | 0.00005 | 0.00089 | Polq      |
| NM_134117    | 1.25 | 0.00005 | 0.00089 | Pkdcc     |
| NM_010657    | 1.24 | 0.00005 | 0.00089 | Hivep3    |
| NM_178804    | 1.24 | 0.00005 | 0.00089 | Slit2     |
| NM_009253    | 1.23 | 0.00005 | 0.00089 | Serpina3m |
| NM_197959    | 1.23 | 0.00005 | 0.00089 | Kif18b    |
| NM_001164557 | 1.23 | 0.00005 | 0.00089 | Pdzklip1  |
| NM_053072    | 1.22 | 0.00005 | 0.00089 | Fgd6      |
| NM_010620    | 1.22 | 0.00005 | 0.00089 | Kif15     |
| NM_181589    | 1.22 | 0.00005 | 0.00089 | Ckap2l    |
| NM_001193305 | 1.22 | 0.00005 | 0.00089 | Mical2    |
| NM_001001334 | 1.21 | 0.00460 | 0.04371 | BC061194  |
| NM_001013377 | 1.21 | 0.00380 | 0.03758 | Arhgef39  |
| NM_054098    | 1.20 | 0.00005 | 0.00089 | Steap4    |
| NM_007681    | 1.20 | 0.00005 | 0.00089 | Cenpa     |
| NM_009378    | 1.19 | 0.00005 | 0.00089 | Thbd      |
| NM_010658    | 1.19 | 0.00340 | 0.03441 | Mafb      |
| NM_013571    | 1.19 | 0.00005 | 0.00089 | Ksr1      |
| NM_001177881 | 1.19 | 0.00005 | 0.00089 | Mfap3l    |
| NM_007925    | 1.19 | 0.00225 | 0.02435 | Eln       |
| NM_026410    | 1.18 | 0.00005 | 0.00089 | Cdca5     |
| NM_016719    | 1.17 | 0.00005 | 0.00089 | Grb14     |
| NM_009373    | 1.17 | 0.00005 | 0.00089 | Tgm2      |
| NM_008276    | 1.16 | 0.00005 | 0.00089 | Hoxd8     |
| NM_007696    | 1.15 | 0.00385 | 0.03790 | Ovgpl     |
| NM_175563    | 1.15 | 0.00005 | 0.00089 | Prr11     |
| NM_026507    | 1.15 | 0.00005 | 0.00089 | Zwilch    |
| NM_001081364 | 1.15 | 0.00005 | 0.00089 | Arhgap21  |
| NM_011132    | 1.15 | 0.00005 | 0.00089 | Pole      |
| NM_001040631 | 1.14 | 0.00005 | 0.00089 | C1qtnf5   |
| NM_178421    | 1.14 | 0.00020 | 0.00307 | Nanos1    |
| NM_198605    | 1.13 | 0.00005 | 0.00089 | Ska3      |
| NM_001013368 | 1.13 | 0.00005 | 0.00089 | E2f8      |
| NM_001172092 | 1.13 | 0.00005 | 0.00089 | Depdc1a   |
| NM_010892    | 1.13 | 0.00005 | 0.00089 | Nek2      |
| NM_153574    | 1.13 | 0.00005 | 0.00089 | Fam13a    |
| NM_001005341 | 1.12 | 0.00005 | 0.00089 | Ypel2     |
| NM_029835    | 1.12 | 0.00085 | 0.01093 | Ticrr     |
| NM_001012273 | 1.12 | 0.00005 | 0.00089 | Birc5     |

|              |      |         |         |               |
|--------------|------|---------|---------|---------------|
| NM_023294    | 1.12 | 0.00005 | 0.00089 | Ndc80         |
| NM_028039    | 1.11 | 0.00005 | 0.00089 | Esco2         |
| NM_172756    | 1.11 | 0.00030 | 0.00442 | Ankle1        |
| NM_028666    | 1.11 | 0.00005 | 0.00089 | Fam110a       |
| NM_025566    | 1.11 | 0.00035 | 0.00506 | Tnfaip811     |
| NM_019483    | 1.11 | 0.00020 | 0.00307 | Smad9         |
| NM_146235    | 1.10 | 0.00005 | 0.00089 | Ercc61        |
| NM_019521    | 1.10 | 0.00005 | 0.00089 | Gas6          |
| NM_001040111 | 1.10 | 0.00005 | 0.00089 | Arap1         |
| NM_021492    | 1.10 | 0.00010 | 0.00167 | Ap3b2         |
| NM_008021    | 1.09 | 0.00005 | 0.00089 | Foxm1         |
| NR_024720    | 1.09 | 0.00070 | 0.00928 | 2700099C18Rik |
| NM_011264    | 1.09 | 0.00005 | 0.00089 | Rev31         |
| NM_013691    | 1.09 | 0.00005 | 0.00089 | Thbs3         |
| NM_001081006 | 1.09 | 0.00005 | 0.00089 | Et14          |
| NR_029439    | 1.09 | 0.00005 | 0.00089 | 1700018A04Rik |
| NM_001110504 | 1.08 | 0.00005 | 0.00089 | Capn1         |
| NM_178609    | 1.08 | 0.00005 | 0.00089 | E2f7          |
| NM_172563    | 1.08 | 0.00005 | 0.00089 | Hlf           |
| NM_134041    | 1.08 | 0.00005 | 0.00089 | 4930427A07Rik |
| NM_010468    | 1.08 | 0.00325 | 0.03313 | Hoxd3         |
| NM_027290    | 1.08 | 0.00005 | 0.00089 | Mcm10         |
| NM_001102468 | 1.08 | 0.00275 | 0.02878 | Calml4        |
| NM_001199123 | 1.07 | 0.00005 | 0.00089 | Sp25          |
| NM_001033217 | 1.07 | 0.00005 | 0.00089 | Prickle1      |
| NM_001163256 | 1.07 | 0.00005 | 0.00089 | Fblim1        |
| NM_138595    | 1.07 | 0.00275 | 0.02878 | Glde          |
| NM_010615    | 1.07 | 0.00005 | 0.00089 | Kif11         |
| NM_139001    | 1.06 | 0.00005 | 0.00089 | Cspg4         |
| NR_030700    | 1.06 | 0.00175 | 0.01972 | 4831440E17Rik |
| NM_001162533 | 1.06 | 0.00410 | 0.03983 | Sh3d21        |
| NM_010110    | 1.06 | 0.00005 | 0.00089 | Efnb1         |
| NM_029568    | 1.06 | 0.00005 | 0.00089 | Mfap4         |
| NM_028266    | 1.05 | 0.00005 | 0.00089 | Coll16a1      |
| NM_001081429 | 1.05 | 0.00045 | 0.00628 | Ccdc15        |
| NM_001145827 | 1.05 | 0.00005 | 0.00089 | Stk40         |
| NM_153762    | 1.05 | 0.00190 | 0.02120 | Rnf26         |
| NM_010790    | 1.05 | 0.00005 | 0.00089 | Melk          |
| NM_175337    | 1.05 | 0.00005 | 0.00089 | Mlh3          |
| NM_009764    | 1.05 | 0.00005 | 0.00089 | Brcal         |
| NM_011121    | 1.05 | 0.00005 | 0.00089 | Plk1          |
| NM_016917    | 1.04 | 0.00005 | 0.00089 | Slc40a1       |
| NM_001029850 | 1.04 | 0.00005 | 0.00089 | Magil         |
| NM_001271729 | 1.04 | 0.00005 | 0.00089 | Tk1           |
| NM_013529    | 1.04 | 0.00005 | 0.00089 | Gfpt2         |
| NM_001284380 | 1.03 | 0.00385 | 0.03790 | Adra1b        |
| NM_023284    | 1.03 | 0.00005 | 0.00089 | Nuf2          |
| NM_026412    | 1.03 | 0.00005 | 0.00089 | Knstrn        |
| NM_009131    | 1.03 | 0.00010 | 0.00167 | Clec11a       |
| NM_001113179 | 1.03 | 0.00005 | 0.00089 | Bub1          |
| NM_026560    | 1.02 | 0.00005 | 0.00089 | Cdca8         |
| NM_001163480 | 1.02 | 0.00005 | 0.00089 | Neur11a       |
| NM_144553    | 1.02 | 0.00005 | 0.00089 | Dlgap5        |
| NM_144526    | 1.01 | 0.00005 | 0.00089 | Fam64a        |
| NM_001163495 | 1.01 | 0.00005 | 0.00089 | Arhgap19      |
| NM_181815    | 1.01 | 0.00015 | 0.00240 | Cep128        |
| NM_001164362 | 1.01 | 0.00005 | 0.00089 | Cep55         |
| NM_016782    | 1.01 | 0.00210 | 0.02283 | Cntnap1       |
| NM_008344    | 1.01 | 0.00005 | 0.00089 | Igfbp6        |
| NM_001136071 | 1.01 | 0.00005 | 0.00089 | Lsp1          |
| NM_139303    | 1.01 | 0.00005 | 0.00089 | Kif18a        |

|              |       |         |         |               |
|--------------|-------|---------|---------|---------------|
| NM_001177625 | 1.00  | 0.00005 | 0.00089 | Ect2          |
| NM_029249    | 1.00  | 0.00005 | 0.00089 | Parpbbp       |
| NM_026878    | 1.00  | 0.00005 | 0.00089 | Ras111b       |
| NM_019641    | 1.00  | 0.00005 | 0.00089 | Stmn1         |
| NM_153778    | 1.00  | 0.00005 | 0.00089 | Atoh8         |
| NM_029352    | -1.00 | 0.00205 | 0.02240 | Dusp9         |
| NM_001081307 | -1.02 | 0.00005 | 0.00089 | Ppp1r12b      |
| NM_008750    | -1.02 | 0.00005 | 0.00089 | Nxn           |
| NM_001204201 | -1.02 | 0.00005 | 0.00089 | Spp1          |
| NM_009721    | -1.02 | 0.00005 | 0.00089 | Atp1b1        |
| NM_011491    | -1.02 | 0.00005 | 0.00089 | Stc2          |
| NM_011610    | -1.03 | 0.00005 | 0.00089 | Tnfrsf1b      |
| NM_011077    | -1.03 | 0.00005 | 0.00089 | Phex          |
| NM_010516    | -1.03 | 0.00005 | 0.00089 | Cyr61         |
| NM_001204129 | -1.04 | 0.00005 | 0.00089 | Clqtnf1       |
| NM_011352    | -1.04 | 0.00230 | 0.02481 | Sema7a        |
| NM_011723    | -1.04 | 0.00005 | 0.00089 | Xdh           |
| NM_173008    | -1.04 | 0.00005 | 0.00089 | Ssc5d         |
| NR_027819    | -1.05 | 0.00005 | 0.00089 | 1810032008Rik |
| NM_201367    | -1.05 | 0.00005 | 0.00089 | Gpr176        |
| NM_144559    | -1.05 | 0.00475 | 0.04483 | Fcgr4         |
| NM_001111021 | -1.05 | 0.00005 | 0.00089 | Runx1         |
| NM_053109    | -1.05 | 0.00005 | 0.00089 | Clec2d        |
| NM_023785    | -1.06 | 0.00415 | 0.04029 | Ppbp          |
| NM_009144    | -1.06 | 0.00005 | 0.00089 | Sfrp2         |
| NM_028474    | -1.06 | 0.00005 | 0.00089 | Ptchd4        |
| NM_024406    | -1.07 | 0.00015 | 0.00240 | Fabp4         |
| NR_033533    | -1.07 | 0.00050 | 0.00690 | Gm12603       |
| NM_007400    | -1.08 | 0.00005 | 0.00089 | Adam12        |
| NM_010924    | -1.08 | 0.00005 | 0.00089 | Nnmt          |
| NM_001039056 | -1.08 | 0.00005 | 0.00089 | Kcnj15        |
| NM_019564    | -1.08 | 0.00355 | 0.03561 | Htral         |
| NM_018781    | -1.09 | 0.00005 | 0.00089 | Egr3          |
| NM_001276489 | -1.11 | 0.00005 | 0.00089 | Ism1          |
| NM_008086    | -1.11 | 0.00005 | 0.00089 | Gas1          |
| NM_001081756 | -1.11 | 0.00005 | 0.00089 | Nckap5        |
| NM_178738    | -1.11 | 0.00015 | 0.00240 | Prss35        |
| NM_013743    | -1.12 | 0.00005 | 0.00089 | Pdk4          |
| NM_023048    | -1.12 | 0.00005 | 0.00089 | Asb4          |
| NM_001284507 | -1.15 | 0.00005 | 0.00089 | Crabp1        |
| NR_040287    | -1.16 | 0.00395 | 0.03876 | A730020E08Rik |
| NM_009676    | -1.16 | 0.00005 | 0.00089 | Aox1          |
| NM_007413    | -1.17 | 0.00005 | 0.00089 | Adora2b       |
| NM_008630    | -1.17 | 0.00005 | 0.00089 | Mt2           |
| NM_013495    | -1.18 | 0.00005 | 0.00089 | Cpt1a         |
| NM_013468    | -1.19 | 0.00005 | 0.00089 | Ankrd1        |
| NM_001029836 | -1.21 | 0.00005 | 0.00089 | Npnt          |
| NM_008760    | -1.21 | 0.00010 | 0.00167 | Ogn           |
| NM_025427    | -1.23 | 0.00005 | 0.00089 | Rgcc          |
| NM_008176    | -1.23 | 0.00005 | 0.00089 | Cxcl1         |
| NM_001039239 | -1.23 | 0.00005 | 0.00089 | Zfp808        |
| NM_007420    | -1.25 | 0.00005 | 0.00089 | Adrb2         |
| NM_008102    | -1.26 | 0.00090 | 0.01150 | Gch1          |
| NM_013654    | -1.26 | 0.00005 | 0.00089 | Ccl17         |
| NM_008491    | -1.28 | 0.00005 | 0.00089 | Len2          |
| NM_001190911 | -1.28 | 0.00005 | 0.00089 | Kirrel3       |
| NM_008695    | -1.30 | 0.00005 | 0.00089 | Nid2          |
| NM_001038839 | -1.30 | 0.00005 | 0.00089 | P2rx7         |
| NR_026733    | -1.31 | 0.00005 | 0.00089 | 3110039M20Rik |
| NM_029600    | -1.33 | 0.00035 | 0.00506 | Abcc3         |
| NM_008404    | -1.35 | 0.00005 | 0.00089 | Itgb2         |



|              |       |         |         |               |
|--------------|-------|---------|---------|---------------|
| NM_139300    | -1.35 | 0.00005 | 0.00089 | Myk           |
| NM_016689    | -1.40 | 0.00020 | 0.00307 | Aqp3          |
| NM_026821    | -1.41 | 0.00005 | 0.00089 | Lurap11       |
| NM_010228    | -1.42 | 0.00005 | 0.00089 | Flt1          |
| NM_013467    | -1.46 | 0.00005 | 0.00089 | Aldh1a1       |
| NM_176933    | -1.46 | 0.00005 | 0.00089 | Dusp4         |
| NM_001081127 | -1.47 | 0.00005 | 0.00089 | Adamts14      |
| NM_011526    | -1.51 | 0.00005 | 0.00089 | Tagln         |
| NM_009141    | -1.53 | 0.00005 | 0.00089 | Cxc15         |
| NM_001025602 | -1.53 | 0.00005 | 0.00089 | Il1r11        |
| NM_011921    | -1.53 | 0.00005 | 0.00089 | Aldh1a7       |
| NM_001013764 | -1.55 | 0.00005 | 0.00089 | Ces1a         |
| NM_001039048 | -1.57 | 0.00005 | 0.00089 | Trim63        |
| NM_001172424 | -1.57 | 0.00005 | 0.00089 | Dhrs3         |
| NM_007562    | -1.59 | 0.00005 | 0.00089 | Bnc1          |
| NM_026436    | -1.61 | 0.00005 | 0.00089 | Tmem86a       |
| NM_010104    | -1.66 | 0.00025 | 0.00374 | Edn1          |
| NM_007498    | -1.67 | 0.00005 | 0.00089 | Atf3          |
| NM_009285    | -1.68 | 0.00040 | 0.00567 | Stc1          |
| NM_011580    | -1.73 | 0.00005 | 0.00089 | Thbs1         |
| NM_023608    | -1.74 | 0.00005 | 0.00089 | Gdpd2         |
| NR_036452    | -1.75 | 0.00005 | 0.00089 | E230016K23Rik |
| NM_030728    | -1.77 | 0.00005 | 0.00089 | 9930013L23Rik |
| NM_053106    | -1.78 | 0.00005 | 0.00089 | Lmod1         |
| NM_027828    | -1.80 | 0.00005 | 0.00089 | Fam110c       |
| NM_011118    | -1.84 | 0.00005 | 0.00089 | Pr12c3        |
| NM_001042615 | -1.87 | 0.00005 | 0.00089 | Htra3         |
| NM_013653    | -1.88 | 0.00005 | 0.00089 | Ccl15         |
| NM_172799    | -1.88 | 0.00005 | 0.00089 | Tt116         |
| NM_011315    | -1.93 | 0.00005 | 0.00089 | Saa3          |
| NM_010235    | -1.93 | 0.00450 | 0.04299 | Fosl1         |
| NM_001112813 | -1.94 | 0.00005 | 0.00089 | Cacna1g       |
| NM_020581    | -2.07 | 0.00005 | 0.00089 | Angpt14       |
| NM_011333    | -2.09 | 0.00005 | 0.00089 | Ccl12         |
| NM_011338    | -2.14 | 0.00005 | 0.00089 | Ccl19         |
| NM_019759    | -2.19 | 0.00005 | 0.00089 | Dpt           |
| NM_080639    | -2.20 | 0.00005 | 0.00089 | Timp4         |
| NM_153170    | -2.70 | 0.00025 | 0.00374 | Slc36a2       |

Control vs Esrrb

| gene         | log2(fold_change) | p_value | q_value | Gene Symbol   |
|--------------|-------------------|---------|---------|---------------|
| NR_045442    | #NAME?            | 0.00005 | 0.00135 | 1700019B21Rik |
| NM_001177437 | inf               | 0.00005 | 0.00135 | Mroh4         |
| NR_040617    | inf               | 0.00015 | 0.00348 | Ptprt         |
| NM_009197    | 6.21              | 0.00005 | 0.00135 | Slc16a2       |
| NM_001252569 | 4.27              | 0.00005 | 0.00135 | Serpina1a     |
| NM_176973    | 4.09              | 0.00085 | 0.01440 | Podxl2        |
| NM_010266    | 3.95              | 0.00005 | 0.00135 | Gda           |
| NM_001256005 | 3.95              | 0.00005 | 0.00135 | Gbp4          |
| NM_001145807 | 3.86              | 0.00005 | 0.00135 | Brinp3        |
| NM_009244    | 3.66              | 0.00005 | 0.00135 | Serpina1b     |
| NM_001024139 | 3.51              | 0.00005 | 0.00135 | Adamts15      |
| NM_008270    | 3.51              | 0.00005 | 0.00135 | Hoxb9         |
| NM_009144    | 3.42              | 0.00005 | 0.00135 | Sfrp2         |
| NM_013554    | 3.24              | 0.00405 | 0.04649 | Hoxd10        |
| NM_033616    | 3.20              | 0.00005 | 0.00135 | Csprs         |
| NM_026142    | 3.16              | 0.00030 | 0.00614 | 3632451006Rik |
| NM_001104547 | 3.06              | 0.00090 | 0.01512 | Vmn2r96       |
| NM_001037909 | 3.00              | 0.00005 | 0.00135 | C130026I21Rik |
| NM_022018    | 2.74              | 0.00005 | 0.00135 | Fam129a       |
| NM_153131    | 2.66              | 0.00005 | 0.00135 | Unc5a         |

|              |      |         |         |               |
|--------------|------|---------|---------|---------------|
| NM_213615    | 2.63 | 0.00005 | 0.00135 | A530032D15Rik |
| NM_001164566 | 2.62 | 0.00005 | 0.00135 | Spats21       |
| NM_009285    | 2.54 | 0.00005 | 0.00135 | Stc1          |
| NM_030194    | 2.52 | 0.00005 | 0.00135 | Sp110         |
| NM_001285917 | 2.49 | 0.00005 | 0.00135 | Dapk1         |
| NM_025658    | 2.48 | 0.00005 | 0.00135 | Ms4a4d        |
| NR_028580    | 2.35 | 0.00015 | 0.00348 | Gm10825       |
| NM_008709    | 2.28 | 0.00060 | 0.01073 | Mycn          |
| NM_007730    | 2.17 | 0.00005 | 0.00135 | Col12a1       |
| NM_001079869 | 2.15 | 0.00010 | 0.00248 | Hoxb3         |
| NM_027852    | 2.09 | 0.00005 | 0.00135 | Rarres2       |
| NM_027406    | 2.08 | 0.00005 | 0.00135 | Aldh111       |
| NM_011909    | 2.05 | 0.00100 | 0.01637 | Usp18         |
| NM_177909    | 2.05 | 0.00045 | 0.00842 | Slc9a9        |
| NM_001039646 | 2.03 | 0.00005 | 0.00135 | Gbp10         |
| NM_008744    | 1.98 | 0.00005 | 0.00135 | Ntn1          |
| NM_001039647 | 1.97 | 0.00005 | 0.00135 | Gbp11         |
| NM_001081746 | 1.93 | 0.00005 | 0.00135 | Gm7609        |
| NM_001164107 | 1.93 | 0.00440 | 0.04935 | Ripk3         |
| NM_009331    | 1.91 | 0.00395 | 0.04573 | Tcf7          |
| NM_028426    | 1.90 | 0.00030 | 0.00614 | 3110007F17Rik |
| NM_001177752 | 1.85 | 0.00005 | 0.00135 | Pfkfb3        |
| NM_178738    | 1.80 | 0.00005 | 0.00135 | Prss35        |
| NM_001128606 | 1.75 | 0.00010 | 0.00248 | Epb4.1        |
| NM_080435    | 1.73 | 0.00055 | 0.01003 | Adcy4         |
| NM_199223    | 1.72 | 0.00005 | 0.00135 | Rtn4rl2       |
| NM_010050    | 1.71 | 0.00005 | 0.00135 | Dio2          |
| NM_080453    | 1.71 | 0.00005 | 0.00135 | Mmp28         |
| NM_175332    | 1.67 | 0.00250 | 0.03259 | E130012A19Rik |
| NM_001109758 | 1.67 | 0.00015 | 0.00348 | Bcan          |
| NR_040297    | 1.66 | 0.00005 | 0.00135 | Gm19757       |
| NM_001205219 | 1.66 | 0.00005 | 0.00135 | Sorbs2        |
| NM_010658    | 1.66 | 0.00040 | 0.00768 | Mafb          |
| NM_173781    | 1.63 | 0.00005 | 0.00135 | Rab6b         |
| NR_015456    | 1.63 | 0.00360 | 0.04269 | D7Ertd715e    |
| NM_001098170 | 1.61 | 0.00005 | 0.00135 | Pcdh10        |
| NM_001122736 | 1.60 | 0.00005 | 0.00135 | Igf2          |
| NM_021451    | 1.57 | 0.00180 | 0.02553 | Pmaip1        |
| NM_001039209 | 1.54 | 0.00005 | 0.00135 | Gm13152       |
| NM_008524    | 1.49 | 0.00005 | 0.00135 | Lum           |
| NM_025492    | 1.49 | 0.00005 | 0.00135 | 1700020L24Rik |
| NM_018870    | 1.48 | 0.00220 | 0.02962 | Pgam2         |
| NM_019419    | 1.47 | 0.00005 | 0.00135 | Arl6ip1       |
| NM_029600    | 1.45 | 0.00005 | 0.00135 | Abcc3         |
| NM_028970    | 1.45 | 0.00360 | 0.04269 | Rbm31y        |
| NM_001029836 | 1.45 | 0.00005 | 0.00135 | Npnt          |
| NM_054098    | 1.44 | 0.00005 | 0.00135 | Steap4        |
| NM_172563    | 1.42 | 0.00005 | 0.00135 | Hlf           |
| NM_153170    | 1.42 | 0.00005 | 0.00135 | Slc36a2       |
| NM_001040085 | 1.40 | 0.00005 | 0.00135 | Syt12         |
| NM_172648    | 1.40 | 0.00005 | 0.00135 | Ifi205        |
| NM_001162884 | 1.40 | 0.00005 | 0.00135 | Igsf10        |
| NM_013834    | 1.39 | 0.00005 | 0.00135 | Sfrp1         |
| NM_001009978 | 1.35 | 0.00015 | 0.00348 | Pde1a         |
| NM_177839    | 1.32 | 0.00005 | 0.00135 | Tnn           |
| NM_029353    | 1.31 | 0.00005 | 0.00135 | Malsu1        |
| NM_001164563 | 1.29 | 0.00005 | 0.00135 | Amigo2        |
| NM_001104550 | 1.27 | 0.00005 | 0.00135 | Vmn2r98       |
| NM_009899    | 1.27 | 0.00005 | 0.00135 | Clca1         |
| NR_040387    | 1.27 | 0.00010 | 0.00248 | A1606473      |
| NM_022312    | 1.26 | 0.00005 | 0.00135 | Tnr           |

|              |       |         |         |               |
|--------------|-------|---------|---------|---------------|
| NM_001039239 | 1.25  | 0.00005 | 0.00135 | Zfp808        |
| NM_011882    | 1.25  | 0.00005 | 0.00135 | Rnasel        |
| NM_001111268 | 1.24  | 0.00005 | 0.00135 | Grik2         |
| NM_001122768 | 1.23  | 0.00005 | 0.00135 | Lrrrc8d       |
| NM_025807    | 1.22  | 0.00005 | 0.00135 | Slc16a9       |
| NM_008817    | 1.22  | 0.00005 | 0.00135 | Peg3          |
| NM_013598    | 1.18  | 0.00005 | 0.00135 | Kit1          |
| NM_001039056 | 1.16  | 0.00005 | 0.00135 | Kcnj15        |
| NM_198100    | 1.15  | 0.00015 | 0.00348 | Tbkbp1        |
| NM_001033337 | 1.15  | 0.00030 | 0.00614 | Ttc38         |
| NM_027828    | 1.14  | 0.00005 | 0.00135 | Fam110c       |
| NM_013846    | 1.12  | 0.00005 | 0.00135 | Ror2          |
| NM_172298    | 1.12  | 0.00005 | 0.00135 | Tshz3         |
| NM_026358    | 1.11  | 0.00005 | 0.00135 | Mgarp         |
| NM_007400    | 1.10  | 0.00005 | 0.00135 | Adam12        |
| NM_001033335 | 1.09  | 0.00005 | 0.00135 | Serpina3f     |
| NM_001111274 | 1.09  | 0.00005 | 0.00135 | Igf1          |
| NM_177741    | 1.08  | 0.00005 | 0.00135 | Ppp1r3b       |
| NM_001080708 | 1.08  | 0.00005 | 0.00135 | Fam65c        |
| NM_181585    | 1.07  | 0.00005 | 0.00135 | Pik3r3        |
| NM_019759    | 1.05  | 0.00005 | 0.00135 | Dpt           |
| NM_001146351 | 1.04  | 0.00005 | 0.00135 | Ephb6         |
| NM_030261    | 1.02  | 0.00005 | 0.00135 | Sesn3         |
| NM_011526    | -1.00 | 0.00005 | 0.00135 | Tagln         |
| NM_011845    | -1.00 | 0.00005 | 0.00135 | Mid2          |
| NM_001013764 | -1.02 | 0.00425 | 0.04815 | Ces1a         |
| NM_009802    | -1.03 | 0.00265 | 0.03396 | Car6          |
| NM_009701    | -1.07 | 0.00305 | 0.03751 | Aqp5          |
| NM_001145799 | -1.09 | 0.00005 | 0.00135 | Ctla2a        |
| NM_029920    | -1.12 | 0.00010 | 0.00248 | Mtus2         |
| NM_008380    | -1.12 | 0.00095 | 0.01576 | Inhba         |
| NR_027819    | -1.14 | 0.00005 | 0.00135 | 1810032008Rik |
| NM_001044740 | -1.14 | 0.00005 | 0.00135 | Slc7a2        |
| NM_015759    | -1.14 | 0.00005 | 0.00135 | Fgd3          |
| NM_181390    | -1.15 | 0.00005 | 0.00135 | Mustn1        |
| NM_001199210 | -1.19 | 0.00010 | 0.00248 | Evalc         |
| NM_001111314 | -1.19 | 0.00035 | 0.00693 | Ngef          |
| NM_013737    | -1.19 | 0.00005 | 0.00135 | Pla2g7        |
| NM_019967    | -1.20 | 0.00005 | 0.00135 | Brinp1        |
| NM_024406    | -1.21 | 0.00005 | 0.00135 | Fabp4         |
| NM_178395    | -1.23 | 0.00230 | 0.03063 | Zdhc2         |
| NM_029881    | -1.28 | 0.00005 | 0.00135 | Tmem200a      |
| NM_001037987 | -1.28 | 0.00005 | 0.00135 | Edil3         |
| NM_007729    | -1.28 | 0.00005 | 0.00135 | Col11a1       |
| NM_011766    | -1.30 | 0.00005 | 0.00135 | Zfpm2         |
| NM_025404    | -1.31 | 0.00375 | 0.04395 | Arl4d         |
| NM_170779    | -1.34 | 0.00005 | 0.00135 | Wwc1          |
| NM_175122    | -1.35 | 0.00005 | 0.00135 | Rab39b        |
| NM_001194940 | -1.36 | 0.00005 | 0.00135 | Dlc1          |
| NM_001159965 | -1.38 | 0.00005 | 0.00135 | Ralgps2       |
| NM_001081169 | -1.38 | 0.00105 | 0.01694 | Aspg          |
| NM_029568    | -1.38 | 0.00005 | 0.00135 | Mfap4         |
| NM_053106    | -1.39 | 0.00005 | 0.00135 | Lmod1         |
| NM_011921    | -1.39 | 0.00005 | 0.00135 | Aldh1a7       |
| NM_001285890 | -1.40 | 0.00005 | 0.00135 | Pde1b         |
| NM_011077    | -1.41 | 0.00005 | 0.00135 | Phex          |
| NM_001039220 | -1.43 | 0.00005 | 0.00135 | AI429214      |
| NM_173007    | -1.45 | 0.00005 | 0.00135 | Tspan12       |
| NM_013653    | -1.48 | 0.00005 | 0.00135 | Cc15          |
| NM_175271    | -1.51 | 0.00005 | 0.00135 | Lpar4         |
| NM_177819    | -1.52 | 0.00005 | 0.00135 | Fam135b       |

|              |       |         |         |           |
|--------------|-------|---------|---------|-----------|
| NM_001008424 | -1.54 | 0.00005 | 0.00135 | Cdsn      |
| NM_019503    | -1.55 | 0.00005 | 0.00135 | Fxyd1     |
| NM_001024474 | -1.58 | 0.00005 | 0.00135 | Diras2    |
| NM_001112725 | -1.58 | 0.00175 | 0.02500 | Aldh3a1   |
| NM_053191    | -1.58 | 0.00005 | 0.00135 | Pi15      |
| NM_001085376 | -1.60 | 0.00005 | 0.00135 | Pappa2    |
| NM_010930    | -1.61 | 0.00005 | 0.00135 | Nov       |
| NM_001163015 | -1.62 | 0.00005 | 0.00135 | Gprasp2   |
| NM_001243072 | -1.67 | 0.00005 | 0.00135 | Sema3a    |
| NM_009610    | -1.70 | 0.00235 | 0.03106 | Actg2     |
| NM_007428    | -1.76 | 0.00065 | 0.01146 | Agt       |
| NM_009655    | -1.78 | 0.00005 | 0.00135 | Alcam     |
| NM_007621    | -1.87 | 0.00005 | 0.00135 | Cbr2      |
| NM_021355    | -1.91 | 0.00005 | 0.00135 | Fmod      |
| NM_001252330 | -1.96 | 0.00005 | 0.00135 | Slc6a15   |
| NM_016917    | -2.01 | 0.00005 | 0.00135 | Slc40a1   |
| NM_025429    | -2.05 | 0.00005 | 0.00135 | Serpinb1a |
| NM_013657    | -2.10 | 0.00005 | 0.00135 | Sema3c    |
| NM_001285956 | -2.15 | 0.00030 | 0.00614 | Podn      |
| NM_175454    | -2.16 | 0.00020 | 0.00441 | Hid1      |
| NM_001039094 | -2.29 | 0.00005 | 0.00135 | Negr1     |
| NM_023850    | -2.39 | 0.00045 | 0.00842 | Chst1     |
| NM_001033228 | -2.53 | 0.00005 | 0.00135 | Itgal     |
| NM_008862    | -3.16 | 0.00005 | 0.00135 | Pkia      |
| NM_026271    | -3.45 | 0.00005 | 0.00135 | Fibin     |
| NM_008904    | -3.46 | 0.00005 | 0.00135 | Ppargc1a  |
| NM_011891    | -3.69 | 0.00005 | 0.00135 | Sgcd      |
| NM_177346    | -4.01 | 0.00005 | 0.00135 | Gpr149    |
| NM_001039934 | -4.98 | 0.00095 | 0.01576 | Map2      |

Control vs Esrrb+Hedgehog

| gene         | log2(fold_change) | p_value | q_value | Gene Symbol   |
|--------------|-------------------|---------|---------|---------------|
| NM_001110009 | #NAME?            | 0.00065 | 0.00434 | Apoc1         |
| NM_175662    | #NAME?            | 0.00005 | 0.00043 | Hist2h2ac     |
| NM_013650    | #NAME?            | 0.00030 | 0.00221 | S100a8        |
| NM_029472    | inf               | 0.00005 | 0.00043 | Gstt4         |
| NM_001177437 | inf               | 0.00005 | 0.00043 | Mroh4         |
| NM_009236    | inf               | 0.00005 | 0.00043 | Sox18         |
| NM_010296    | 9.46              | 0.00045 | 0.00316 | Gli1          |
| NM_009197    | 6.48              | 0.00005 | 0.00043 | Slc16a2       |
| NM_001044751 | 5.31              | 0.00005 | 0.00043 | Hsd11b1       |
| NM_152803    | 4.47              | 0.00540 | 0.02550 | Hpse          |
| NM_001252569 | 4.41              | 0.00005 | 0.00043 | Serpinala     |
| NM_008957    | 4.09              | 0.00005 | 0.00043 | Ptch1         |
| NM_009244    | 4.07              | 0.00010 | 0.00082 | Serpinalb     |
| NM_013690    | 4.00              | 0.00005 | 0.00043 | Tek           |
| NM_013554    | 3.99              | 0.00215 | 0.01202 | Hoxd10        |
| NM_001099276 | 3.91              | 0.00005 | 0.00043 | Pik3c2b       |
| NM_176973    | 3.91              | 0.00150 | 0.00884 | Podx12        |
| NM_001145807 | 3.90              | 0.00005 | 0.00043 | Brinp3        |
| NM_001024139 | 3.87              | 0.00005 | 0.00043 | Adamts15      |
| NM_001177752 | 3.85              | 0.00005 | 0.00043 | Pfkfb3        |
| NM_001256005 | 3.84              | 0.00005 | 0.00043 | Gbp4          |
| NM_016867    | 3.63              | 0.00005 | 0.00043 | Gipc2         |
| NM_016808    | 3.58              | 0.00005 | 0.00043 | Usp2          |
| NM_009117    | 3.48              | 0.00385 | 0.01955 | Saa1          |
| NM_026142    | 3.36              | 0.00090 | 0.00575 | 3632451006Rik |
| NM_008623    | 3.34              | 0.00895 | 0.03795 | Mpz           |
| NM_010266    | 3.33              | 0.00005 | 0.00043 | Gda           |
| NM_153131    | 3.31              | 0.00005 | 0.00043 | Unc5a         |
| NM_033616    | 3.27              | 0.00005 | 0.00043 | Csprs         |

|              |      |         |         |               |
|--------------|------|---------|---------|---------------|
| NM_009641    | 3.22 | 0.00005 | 0.00043 | Angpt4        |
| NM_010050    | 3.19 | 0.00005 | 0.00043 | Dio2          |
| NM_022657    | 3.17 | 0.00005 | 0.00043 | Fgf23         |
| NM_007957    | 3.02 | 0.00870 | 0.03718 | Esx1          |
| NM_001037909 | 2.97 | 0.00005 | 0.00043 | C130026I21Rik |
| NM_008709    | 2.88 | 0.00020 | 0.00154 | Mycn          |
| NM_001145886 | 2.85 | 0.00005 | 0.00043 | Tiam1         |
| NM_007539    | 2.84 | 0.00005 | 0.00043 | Bdkrb1        |
| NM_001177713 | 2.83 | 0.00005 | 0.00043 | Cyp26b1       |
| NM_001146180 | 2.74 | 0.00005 | 0.00043 | Mtss1         |
| NM_011623    | 2.73 | 0.00005 | 0.00043 | Top2a         |
| NM_007894    | 2.71 | 0.01070 | 0.04392 | Ear1          |
| NM_008270    | 2.70 | 0.00005 | 0.00043 | Hoxb9         |
| NM_007719    | 2.65 | 0.00035 | 0.00251 | Ccr7          |
| NM_001167680 | 2.62 | 0.00005 | 0.00043 | Rhbdf2        |
| NM_001164355 | 2.60 | 0.00005 | 0.00043 | Ska1          |
| NM_008489    | 2.59 | 0.00005 | 0.00043 | Lbp           |
| NM_009382    | 2.58 | 0.00005 | 0.00043 | Thy1          |
| NM_010517    | 2.57 | 0.00005 | 0.00043 | Igfbp4        |
| NM_001162506 | 2.57 | 0.00005 | 0.00043 | Troap         |
| NM_001081258 | 2.54 | 0.00005 | 0.00043 | Kif14         |
| NM_008380    | 2.51 | 0.00005 | 0.00043 | Inhba         |
| NM_146208    | 2.50 | 0.00005 | 0.00043 | Neil3         |
| NM_213615    | 2.49 | 0.00005 | 0.00043 | A530032D15Rik |
| NM_145356    | 2.48 | 0.00005 | 0.00043 | Zbtb7c        |
| NM_010518    | 2.46 | 0.00005 | 0.00043 | Igfbp5        |
| NM_001281819 | 2.46 | 0.00005 | 0.00043 | Ace           |
| NM_001164107 | 2.45 | 0.00055 | 0.00376 | Ripk3         |
| NM_001081117 | 2.45 | 0.00005 | 0.00043 | Mki67         |
| NM_030172    | 2.42 | 0.00015 | 0.00119 | Efcab11       |
| NM_009860    | 2.41 | 0.00005 | 0.00043 | Cdc25c        |
| NM_153137    | 2.39 | 0.00005 | 0.00043 | Traf3ip3      |
| NM_054098    | 2.39 | 0.00005 | 0.00043 | Steap4        |
| NM_001081363 | 2.38 | 0.00005 | 0.00043 | Cenpf         |
| NM_026778    | 2.37 | 0.00005 | 0.00043 | Cthrc1        |
| NR_030721    | 2.37 | 0.00005 | 0.00043 | Foxd2os       |
| NM_031168    | 2.37 | 0.00005 | 0.00043 | I16           |
| NM_001110265 | 2.37 | 0.00005 | 0.00043 | Ttk           |
| NM_016851    | 2.34 | 0.00005 | 0.00043 | Irf6          |
| NM_001122768 | 2.34 | 0.00005 | 0.00043 | Lrrc8d        |
| NM_197959    | 2.30 | 0.00005 | 0.00043 | Kif18b        |
| NM_030194    | 2.29 | 0.00005 | 0.00043 | Sp110         |
| NM_027930    | 2.29 | 0.00005 | 0.00043 | Mtfr2         |
| NR_030721    | 2.28 | 0.00005 | 0.00043 | Foxd2os       |
| NM_013538    | 2.27 | 0.00005 | 0.00043 | Cdca3         |
| NM_025429    | 2.26 | 0.00005 | 0.00043 | Serpina1a     |
| NM_172563    | 2.26 | 0.00005 | 0.00043 | Hlf           |
| NM_001081746 | 2.26 | 0.00005 | 0.00043 | Gm7609        |
| NM_001110162 | 2.24 | 0.00005 | 0.00043 | Cdca2         |
| NM_001104547 | 2.24 | 0.00400 | 0.02014 | Vmn2r96       |
| NM_008235    | 2.22 | 0.00005 | 0.00043 | Hes1          |
| NM_178609    | 2.22 | 0.00005 | 0.00043 | E2f7          |
| NM_009791    | 2.22 | 0.00005 | 0.00043 | Aspm          |
| NM_008276    | 2.21 | 0.00005 | 0.00043 | Hoxd8         |
| NM_007730    | 2.21 | 0.00005 | 0.00043 | Coll2a1       |
| NM_029617    | 2.21 | 0.00005 | 0.00043 | Casc5         |
| NM_011121    | 2.17 | 0.00005 | 0.00043 | Plk1          |
| NM_027975    | 2.17 | 0.00005 | 0.00043 | Fam83d        |
| NM_009115    | 2.17 | 0.00765 | 0.03362 | S100b         |
| NM_029835    | 2.16 | 0.00005 | 0.00043 | Ticrr         |
| NM_028039    | 2.16 | 0.00005 | 0.00043 | Esco2         |

|              |      |         |         |               |
|--------------|------|---------|---------|---------------|
| NM_027290    | 2.15 | 0.00005 | 0.00043 | Mcm10         |
| NM_001081085 | 2.15 | 0.00005 | 0.00043 | Sapcd2        |
| NM_001128606 | 2.15 | 0.00005 | 0.00043 | Epb4.1        |
| NM_001042421 | 2.14 | 0.00005 | 0.00043 | Kntc1         |
| NM_001033633 | 2.13 | 0.00005 | 0.00043 | Slc2a13       |
| NM_001014976 | 2.12 | 0.00005 | 0.00043 | Esp11         |
| NM_010658    | 2.12 | 0.00005 | 0.00043 | Mafb          |
| NM_173762    | 2.11 | 0.00005 | 0.00043 | Cenpe         |
| NM_010620    | 2.11 | 0.00005 | 0.00043 | Kif15         |
| NM_198423    | 2.10 | 0.00005 | 0.00043 | Bahcc1        |
| NM_172756    | 2.10 | 0.00005 | 0.00043 | Ankle1        |
| NM_001025779 | 2.10 | 0.00005 | 0.00043 | Cdc6          |
| NM_134117    | 2.08 | 0.00005 | 0.00043 | Pkdcc         |
| NM_001163495 | 2.08 | 0.00005 | 0.00043 | Arhgap19      |
| NM_001172092 | 2.07 | 0.00005 | 0.00043 | Depdcl1a      |
| NM_010740    | 2.07 | 0.00005 | 0.00043 | Cd93          |
| NM_181589    | 2.07 | 0.00005 | 0.00043 | Ckap21        |
| NM_016925    | 2.06 | 0.00005 | 0.00043 | Fanca         |
| NM_001012273 | 2.06 | 0.00005 | 0.00043 | Birc5         |
| NM_001271729 | 2.06 | 0.00005 | 0.00043 | Tk1           |
| NM_007708    | 2.05 | 0.00005 | 0.00043 | Cit           |
| NM_172453    | 2.05 | 0.00005 | 0.00043 | Pif1          |
| NM_022018    | 2.04 | 0.00005 | 0.00043 | Fam129a       |
| NM_001079869 | 2.04 | 0.00025 | 0.00187 | Hoxb3         |
| NM_134471    | 2.04 | 0.00005 | 0.00043 | Kif2c         |
| NM_024184    | 2.03 | 0.00005 | 0.00043 | Asf1b         |
| NM_025658    | 2.02 | 0.00005 | 0.00043 | Ms4a4d        |
| NM_198605    | 2.02 | 0.00005 | 0.00043 | Ska3          |
| NM_001013368 | 2.02 | 0.00005 | 0.00043 | E2f8          |
| NM_013552    | 2.02 | 0.00005 | 0.00043 | Hmmr          |
| NM_010468    | 2.02 | 0.00005 | 0.00043 | Hoxd3         |
| NM_001195025 | 2.02 | 0.00005 | 0.00043 | Nuak2         |
| NM_009144    | 2.02 | 0.00005 | 0.00043 | Sfrp2         |
| NM_144553    | 2.01 | 0.00005 | 0.00043 | Dlgap5        |
| NM_011132    | 2.01 | 0.00005 | 0.00043 | Pole          |
| NM_001159369 | 2.00 | 0.00005 | 0.00043 | Polq          |
| NM_175554    | 2.00 | 0.00005 | 0.00043 | Clspn         |
| NM_019444    | 1.99 | 0.00005 | 0.00043 | Ramp2         |
| NM_177343    | 1.99 | 0.00005 | 0.00043 | Camk1d        |
| NM_010790    | 1.99 | 0.00005 | 0.00043 | Melk          |
| NM_009185    | 1.99 | 0.00005 | 0.00043 | Stil          |
| NM_013555    | 1.99 | 0.00005 | 0.00043 | Hoxd9         |
| NM_001113179 | 1.99 | 0.00005 | 0.00043 | Bub1          |
| NM_008021    | 1.98 | 0.00005 | 0.00043 | Foxm1         |
| NM_009013    | 1.98 | 0.00005 | 0.00043 | Rad51ap1      |
| NM_010615    | 1.98 | 0.00005 | 0.00043 | Kif11         |
| NM_028481    | 1.98 | 0.00005 | 0.00043 | Ccdc18        |
| NM_009252    | 1.98 | 0.00005 | 0.00043 | Serpina3n     |
| NM_001113460 | 1.97 | 0.00005 | 0.00043 | Tec           |
| NM_172671    | 1.97 | 0.00005 | 0.00043 | Lgr4          |
| NM_172301    | 1.97 | 0.00005 | 0.00043 | Cenb1         |
| NM_176982    | 1.96 | 0.00005 | 0.00043 | Fbxo48        |
| NM_028870    | 1.96 | 0.00005 | 0.00043 | Cltb          |
| NM_009764    | 1.95 | 0.00005 | 0.00043 | Brcal         |
| NM_011496    | 1.95 | 0.00005 | 0.00043 | Aurkb         |
| NM_001168672 | 1.95 | 0.00005 | 0.00043 | Gtse1         |
| NM_010892    | 1.95 | 0.00005 | 0.00043 | Nek2          |
| NM_026507    | 1.95 | 0.00005 | 0.00043 | Zwilch        |
| NM_008651    | 1.94 | 0.00005 | 0.00043 | Mybl1         |
| NR_027817    | 1.93 | 0.00385 | 0.01955 | 1500011B03Rik |
| NM_008185    | 1.93 | 0.00005 | 0.00043 | Gstt1         |

|              |      |         |         |               |
|--------------|------|---------|---------|---------------|
| NM_009828    | 1.92 | 0.00005 | 0.00043 | Ccna2         |
| NM_144818    | 1.92 | 0.00005 | 0.00043 | Ncaph         |
| NM_001141975 | 1.92 | 0.00005 | 0.00043 | Tpx2          |
| NM_144526    | 1.92 | 0.00005 | 0.00043 | Fam64a        |
| NM_009773    | 1.91 | 0.00005 | 0.00043 | Bub1b         |
| NM_175563    | 1.91 | 0.00005 | 0.00043 | Prr11         |
| NM_007681    | 1.90 | 0.00005 | 0.00043 | Cenpa         |
| NM_001039646 | 1.90 | 0.00005 | 0.00043 | Gbp10         |
| NM_026410    | 1.90 | 0.00005 | 0.00043 | Cdca5         |
| NM_011909    | 1.90 | 0.00265 | 0.01429 | Usp18         |
| NM_026412    | 1.90 | 0.00005 | 0.00043 | Knstrn        |
| NM_001013377 | 1.90 | 0.00025 | 0.00187 | Arhgef39      |
| NM_001285997 | 1.89 | 0.00005 | 0.00043 | Prc1          |
| NM_011497    | 1.89 | 0.00005 | 0.00043 | Aurka         |
| NM_134041    | 1.89 | 0.00005 | 0.00043 | 4930427A07Rik |
| NM_001199123 | 1.89 | 0.00005 | 0.00043 | Spc25         |
| NM_007993    | 1.89 | 0.00005 | 0.00043 | Fbn1          |
| NM_023223    | 1.89 | 0.00005 | 0.00043 | Cdc20         |
| NM_009437    | 1.88 | 0.00040 | 0.00284 | Tst           |
| NM_001285917 | 1.88 | 0.00005 | 0.00043 | Dapk1         |
| NM_001199696 | 1.87 | 0.00005 | 0.00043 | Bai2          |
| NM_001033484 | 1.87 | 0.00005 | 0.00043 | Iqgap3        |
| NM_145924    | 1.87 | 0.00005 | 0.00043 | Cenpi         |
| NM_183046    | 1.86 | 0.00005 | 0.00043 | Kif20b        |
| NM_178421    | 1.85 | 0.00005 | 0.00043 | Nanos1        |
| NM_023284    | 1.85 | 0.00005 | 0.00043 | Nuf2          |
| NM_008055    | 1.85 | 0.00005 | 0.00043 | Fzd4          |
| NM_146171    | 1.85 | 0.00005 | 0.00043 | Ncapd2        |
| NM_145588    | 1.84 | 0.00005 | 0.00043 | Kif22         |
| NM_033270    | 1.84 | 0.00050 | 0.00346 | E2f6          |
| NM_153762    | 1.84 | 0.00005 | 0.00043 | Rnf26         |
| NM_011369    | 1.83 | 0.00005 | 0.00043 | Shcbp1        |
| NM_001033141 | 1.83 | 0.00485 | 0.02336 | Ecsr          |
| NM_008593    | 1.83 | 0.00070 | 0.00463 | Foxd2         |
| NM_080435    | 1.83 | 0.00065 | 0.00434 | Adcy4         |
| NM_026560    | 1.82 | 0.00005 | 0.00043 | Cdca8         |
| NR_001592    | 1.82 | 0.00005 | 0.00043 | H19           |
| NR_015456    | 1.82 | 0.00230 | 0.01272 | D7Ertd715e    |
| NM_019753    | 1.82 | 0.00005 | 0.00043 | Cdh17         |
| NM_001042653 | 1.80 | 0.00160 | 0.00936 | Oip5          |
| NM_001003919 | 1.80 | 0.00005 | 0.00043 | Ddx11         |
| NM_001167743 | 1.80 | 0.00005 | 0.00043 | Slfn8         |
| NM_010657    | 1.80 | 0.00005 | 0.00043 | Hivep3        |
| NM_001164566 | 1.79 | 0.00005 | 0.00043 | Spats21       |
| NM_001033464 | 1.79 | 0.00005 | 0.00043 | Efcab4b       |
| NM_021342    | 1.79 | 0.00005 | 0.00043 | Kcne4         |
| NM_001177867 | 1.79 | 0.00005 | 0.00043 | Sgol2         |
| NM_198654    | 1.79 | 0.00005 | 0.00043 | Nsl1          |
| NM_024245    | 1.78 | 0.00005 | 0.00043 | Kif23         |
| NM_017407    | 1.78 | 0.00005 | 0.00043 | Spag5         |
| NM_001080995 | 1.78 | 0.00005 | 0.00043 | 4632434I11Rik |
| NM_026785    | 1.78 | 0.00005 | 0.00043 | Ube2c         |
| NM_178309    | 1.77 | 0.00005 | 0.00043 | Brip1         |
| NM_029249    | 1.76 | 0.00005 | 0.00043 | Parpbp        |
| NM_001001804 | 1.76 | 0.01085 | 0.04440 | Ephx4         |
| NM_001131054 | 1.76 | 0.00005 | 0.00043 | Pttg1         |
| NM_023209    | 1.76 | 0.00005 | 0.00043 | Pbk           |
| NM_001195298 | 1.76 | 0.00005 | 0.00043 | Kifc1         |
| NM_023294    | 1.75 | 0.00005 | 0.00043 | Ndc80         |
| NM_001098170 | 1.75 | 0.00005 | 0.00043 | Pcdh10        |
| NM_001177625 | 1.74 | 0.00005 | 0.00043 | Ect2          |

|              |      |         |         |               |
|--------------|------|---------|---------|---------------|
| NM_016854    | 1.74 | 0.00005 | 0.00043 | Ppp1r3c       |
| NM_001127259 | 1.74 | 0.00005 | 0.00043 | Trp63         |
| NM_001081125 | 1.74 | 0.00005 | 0.00043 | Gli2          |
| NM_001159518 | 1.74 | 0.00005 | 0.00043 | Igfbp7        |
| NM_177331    | 1.72 | 0.00005 | 0.00043 | Gen1          |
| NM_001039556 | 1.72 | 0.00005 | 0.00043 | Rad54b        |
| NM_153544    | 1.71 | 0.00005 | 0.00043 | BC030867      |
| NM_172578    | 1.71 | 0.00005 | 0.00043 | Mis18bp1      |
| NM_146235    | 1.71 | 0.00005 | 0.00043 | Ercc61        |
| NM_001033455 | 1.71 | 0.00040 | 0.00284 | Ccdc27        |
| NM_019641    | 1.70 | 0.00005 | 0.00043 | Stmn1         |
| NM_028232    | 1.70 | 0.00005 | 0.00043 | Sgol1         |
| NM_009931    | 1.69 | 0.00005 | 0.00043 | Col4a1        |
| NM_025979    | 1.69 | 0.00005 | 0.00043 | Mast1         |
| NM_029482    | 1.69 | 0.00005 | 0.00043 | 4930579G24Rik |
| NM_058214    | 1.68 | 0.00005 | 0.00043 | Recq14        |
| NM_001033331 | 1.68 | 0.00005 | 0.00043 | Gas213        |
| NM_001081406 | 1.68 | 0.00065 | 0.00434 | Lrr1          |
| NM_019971    | 1.68 | 0.00005 | 0.00043 | Pdgfc         |
| NM_028666    | 1.67 | 0.00005 | 0.00043 | Fam110a       |
| NM_023058    | 1.65 | 0.00005 | 0.00043 | Pkmyt1        |
| NM_001122958 | 1.65 | 0.00635 | 0.02902 | Rad541        |
| NM_001032413 | 1.65 | 0.00005 | 0.00043 | Pear1         |
| NM_008652    | 1.65 | 0.00005 | 0.00043 | Mybl2         |
| NM_028222    | 1.65 | 0.00005 | 0.00043 | Cdkn3         |
| NM_146186    | 1.65 | 0.00005 | 0.00043 | Wdr62         |
| NM_001033244 | 1.64 | 0.00005 | 0.00043 | Fancd2        |
| NM_178252    | 1.64 | 0.00005 | 0.00043 | Arhgap33      |
| NM_001163763 | 1.64 | 0.00005 | 0.00043 | Tcf19         |
| NM_001040435 | 1.63 | 0.00005 | 0.00043 | Tacc3         |
| NM_026743    | 1.63 | 0.00005 | 0.00043 | Tspan11       |
| NM_008446    | 1.63 | 0.00005 | 0.00043 | Kif4          |
| NM_019670    | 1.63 | 0.00005 | 0.00043 | Diap3         |
| NM_198622    | 1.63 | 0.00005 | 0.00043 | H1fx          |
| NM_007525    | 1.63 | 0.00005 | 0.00043 | Bard1         |
| NM_001080158 | 1.63 | 0.00005 | 0.00043 | Cenpm         |
| NM_010353    | 1.62 | 0.00005 | 0.00043 | Gsg2          |
| NM_001163256 | 1.61 | 0.00005 | 0.00043 | Fblim1        |
| NM_139303    | 1.61 | 0.00005 | 0.00043 | Kif18a        |
| NM_009253    | 1.61 | 0.00005 | 0.00043 | Serpina3m     |
| NM_001163793 | 1.61 | 0.00005 | 0.00043 | C530008M17Rik |
| NR_033780    | 1.61 | 0.00005 | 0.00043 | 2810001G20Rik |
| NM_172564    | 1.61 | 0.00005 | 0.00043 | Tns4          |
| NM_145409    | 1.60 | 0.00005 | 0.00043 | Chtf18        |
| NM_053173    | 1.60 | 0.00005 | 0.00043 | Kifc5b        |
| NM_001012766 | 1.60 | 0.00170 | 0.00984 | Ear12         |
| NM_001271705 | 1.60 | 0.00975 | 0.04064 | Pgf           |
| NM_175265    | 1.60 | 0.00005 | 0.00043 | Bora          |
| NR_024720    | 1.60 | 0.00005 | 0.00043 | 2700099C18Rik |
| NM_016692    | 1.60 | 0.00005 | 0.00043 | Incenp        |
| NM_153524    | 1.59 | 0.00565 | 0.02642 | Mrgpra4       |
| NM_001146081 | 1.59 | 0.00005 | 0.00043 | Fancb         |
| NM_019438    | 1.58 | 0.00005 | 0.00043 | Ncapg         |
| NM_029975    | 1.58 | 0.00005 | 0.00043 | Ulbpl         |
| NM_178683    | 1.57 | 0.00005 | 0.00043 | Depdc1b       |
| NM_001145827 | 1.57 | 0.00005 | 0.00043 | Stk40         |
| NM_025415    | 1.57 | 0.00005 | 0.00043 | Cks2          |
| NM_001252055 | 1.57 | 0.00005 | 0.00043 | Ly6c1         |
| NM_001163356 | 1.56 | 0.00010 | 0.00082 | Fam212b       |
| NM_013571    | 1.56 | 0.00005 | 0.00043 | Ksr1          |
| NM_001142952 | 1.56 | 0.00235 | 0.01295 | Fam46c        |



|              |      |         |         |               |
|--------------|------|---------|---------|---------------|
| NM_177372    | 1.56 | 0.00005 | 0.00043 | Dna2          |
| NM_001164362 | 1.56 | 0.00005 | 0.00043 | Cep55         |
| NM_001109747 | 1.55 | 0.00005 | 0.00043 | Cenpw         |
| NM_021886    | 1.55 | 0.00005 | 0.00043 | Cenph         |
| NM_007634    | 1.55 | 0.00005 | 0.00043 | Ccnf          |
| NM_001163476 | 1.55 | 0.00005 | 0.00043 | Gins1         |
| NM_001085549 | 1.55 | 0.00005 | 0.00043 | Trabd2b       |
| NM_001111274 | 1.54 | 0.00005 | 0.00043 | Igf1          |
| NM_025995    | 1.54 | 0.00005 | 0.00043 | Fbxo5         |
| NM_001009978 | 1.54 | 0.00005 | 0.00043 | Pdela         |
| NM_012012    | 1.54 | 0.00005 | 0.00043 | Exo1          |
| NM_172145    | 1.54 | 0.00005 | 0.00043 | Eva1b         |
| NM_029766    | 1.53 | 0.00005 | 0.00043 | Dtl           |
| NM_181848    | 1.53 | 0.00005 | 0.00043 | Otpn          |
| NM_008744    | 1.53 | 0.00005 | 0.00043 | Ntn1          |
| NM_009932    | 1.52 | 0.00005 | 0.00043 | Col4a2        |
| NM_181815    | 1.52 | 0.00005 | 0.00043 | Cep128        |
| NM_001159930 | 1.52 | 0.00005 | 0.00043 | Cenpl         |
| NM_008017    | 1.52 | 0.00005 | 0.00043 | Smc2          |
| NM_028390    | 1.52 | 0.00005 | 0.00043 | Anln          |
| NM_026613    | 1.51 | 0.00005 | 0.00043 | Ccdc34        |
| NM_009104    | 1.51 | 0.00005 | 0.00043 | Rrm2          |
| NM_028013    | 1.51 | 0.00005 | 0.00043 | Endod1        |
| NM_001164564 | 1.50 | 0.00005 | 0.00043 | Egf17         |
| NM_027435    | 1.50 | 0.00005 | 0.00043 | Atad2         |
| NM_001253808 | 1.50 | 0.00005 | 0.00043 | Racgap1       |
| NM_026301    | 1.49 | 0.00035 | 0.00251 | Rnf125        |
| NM_001166406 | 1.49 | 0.00005 | 0.00043 | Kif20a        |
| NM_019521    | 1.49 | 0.00005 | 0.00043 | Gas6          |
| NM_007695    | 1.49 | 0.00005 | 0.00043 | Chil1         |
| NM_173781    | 1.49 | 0.00005 | 0.00043 | Rab6b         |
| NM_028349    | 1.48 | 0.00005 | 0.00043 | Sass6         |
| NM_013807    | 1.48 | 0.00005 | 0.00043 | Plk3          |
| NM_027182    | 1.46 | 0.00005 | 0.00043 | Trip13        |
| NR_023846    | 1.46 | 0.00060 | 0.00405 | Peg3os        |
| NM_011234    | 1.46 | 0.00005 | 0.00043 | Rad51         |
| NR_040297    | 1.46 | 0.00010 | 0.00082 | Gm19757       |
| NM_008716    | 1.46 | 0.00005 | 0.00043 | Notch3        |
| NM_146116    | 1.45 | 0.00005 | 0.00043 | Tubb4b        |
| NM_001177794 | 1.45 | 0.00005 | 0.00043 | Sertad4       |
| NM_008209    | 1.45 | 0.00005 | 0.00043 | Mr1           |
| NM_001080708 | 1.45 | 0.00005 | 0.00043 | Fam65c        |
| NR_033736    | 1.45 | 0.00005 | 0.00043 | E330020D12Rik |
| NM_017370    | 1.45 | 0.00005 | 0.00043 | Hp            |
| NM_026515    | 1.45 | 0.00005 | 0.00043 | 2810417H13Rik |
| NM_080467    | 1.44 | 0.00005 | 0.00043 | Atp6v0a4      |
| NM_001039209 | 1.44 | 0.00015 | 0.00119 | Gm13152       |
| NM_175332    | 1.44 | 0.00615 | 0.02830 | E130012A19Rik |
| NM_001081099 | 1.44 | 0.00055 | 0.00376 | Clhc1         |
| NM_027354    | 1.43 | 0.00005 | 0.00043 | Poc1a         |
| NM_178804    | 1.43 | 0.00005 | 0.00043 | Slit2         |
| NM_001033217 | 1.43 | 0.00005 | 0.00043 | Prickle1      |
| NM_008817    | 1.43 | 0.00005 | 0.00043 | Peg3          |
| NM_001190717 | 1.42 | 0.00005 | 0.00043 | Dbf4          |
| NM_001004140 | 1.42 | 0.00005 | 0.00043 | Ckap2         |
| NM_019419    | 1.42 | 0.00005 | 0.00043 | Arl6ip1       |
| NM_013529    | 1.42 | 0.00005 | 0.00043 | Gfpt2         |
| NM_001029838 | 1.42 | 0.00005 | 0.00043 | Pknox2        |
| NM_008458    | 1.42 | 0.00035 | 0.00251 | Serpina3c     |
| NM_146238    | 1.41 | 0.00005 | 0.00043 | Gemin8        |
| NM_001205219 | 1.41 | 0.00005 | 0.00043 | Sorbs2        |

|              |      |         |         |               |
|--------------|------|---------|---------|---------------|
| NM_028261    | 1.41 | 0.00005 | 0.00043 | Tmem173       |
| NR_015469    | 1.40 | 0.00005 | 0.00043 | 2810442I21Rik |
| NM_001037134 | 1.40 | 0.00005 | 0.00043 | Ccne2         |
| NM_001163359 | 1.39 | 0.00005 | 0.00043 | Figl1         |
| NM_181416    | 1.39 | 0.00005 | 0.00043 | Arhgap11a     |
| NM_001114386 | 1.39 | 0.00005 | 0.00043 | Nedd4l        |
| NM_008566    | 1.39 | 0.00005 | 0.00043 | Mcm5          |
| NM_010049    | 1.39 | 0.00005 | 0.00043 | Dhfr          |
| NM_011495    | 1.39 | 0.00005 | 0.00043 | Plk4          |
| NR_037955    | 1.38 | 0.00005 | 0.00043 | 1190002F15Rik |
| NM_026282    | 1.38 | 0.00005 | 0.00043 | Spc24         |
| NM_010655    | 1.38 | 0.00005 | 0.00043 | Kpna2         |
| NM_001163480 | 1.38 | 0.00005 | 0.00043 | Neur11a       |
| NM_010726    | 1.38 | 0.00005 | 0.00043 | Phyh          |
| NM_012018    | 1.37 | 0.00005 | 0.00043 | Cep110        |
| NM_007659    | 1.37 | 0.00005 | 0.00043 | Cdk1          |
| NM_008882    | 1.37 | 0.00005 | 0.00043 | Plxna2        |
| NM_001122736 | 1.37 | 0.00005 | 0.00043 | Igf2          |
| NM_025566    | 1.37 | 0.00015 | 0.00119 | Tnfaip811     |
| NM_011264    | 1.37 | 0.00005 | 0.00043 | Rev3l         |
| NM_001111268 | 1.36 | 0.00005 | 0.00043 | Grik2         |
| NM_028131    | 1.36 | 0.00005 | 0.00043 | Cenpn         |
| NM_001159646 | 1.36 | 0.00005 | 0.00043 | Dut           |
| NM_172598    | 1.36 | 0.00005 | 0.00043 | Wdhd1         |
| NM_016719    | 1.35 | 0.00005 | 0.00043 | Grb14         |
| NM_028006    | 1.35 | 0.00005 | 0.00043 | Tubel         |
| NM_001033335 | 1.35 | 0.00005 | 0.00043 | Serpina3f     |
| NM_019499    | 1.35 | 0.00005 | 0.00043 | Mad2l1        |
| NM_013733    | 1.35 | 0.00005 | 0.00043 | Chaf1a        |
| NM_001162533 | 1.34 | 0.00125 | 0.00762 | Sh3d2l        |
| NM_008737    | 1.34 | 0.00005 | 0.00043 | Nrp1          |
| NM_133897    | 1.34 | 0.00005 | 0.00043 | Lrrc8c        |
| NM_144786    | 1.34 | 0.00005 | 0.00043 | Ggt7          |
| NR_038009    | 1.33 | 0.00005 | 0.00043 | 2810408I11Rik |
| NM_001161623 | 1.32 | 0.00005 | 0.00043 | Cdc45         |
| NM_153805    | 1.32 | 0.00010 | 0.00082 | Pkn3          |
| NM_080453    | 1.32 | 0.00005 | 0.00043 | Mmp28         |
| NM_027263    | 1.32 | 0.00005 | 0.00043 | Apitd1        |
| NM_183089    | 1.32 | 0.00005 | 0.00043 | Dscc1         |
| NM_027411    | 1.32 | 0.00005 | 0.00043 | Spdl1         |
| NM_146174    | 1.32 | 0.00005 | 0.00043 | Fam115c       |
| NM_001029856 | 1.32 | 0.00005 | 0.00043 | Atad5         |
| NM_027225    | 1.31 | 0.00005 | 0.00043 | Cob111        |
| NM_007955    | 1.30 | 0.00005 | 0.00043 | Ptprv         |
| NM_029842    | 1.30 | 0.00265 | 0.01429 | Kdm8          |
| NM_001111078 | 1.30 | 0.00005 | 0.00043 | Uhrf1         |
| NM_009769    | 1.30 | 0.00005 | 0.00043 | Klf5          |
| NM_001081695 | 1.30 | 0.00390 | 0.01974 | Dnmt3l        |
| NM_172616    | 1.30 | 0.00005 | 0.00043 | C330027C09Rik |
| NM_001039543 | 1.30 | 0.00005 | 0.00043 | Mlf1          |
| NM_011452    | 1.30 | 0.00150 | 0.00884 | Serpina9b     |
| NM_010637    | 1.29 | 0.00005 | 0.00043 | Klf4          |
| NM_001039647 | 1.29 | 0.00005 | 0.00043 | Gbp11         |
| NM_008966    | 1.29 | 0.00005 | 0.00043 | Ptgfr         |
| NM_008921    | 1.29 | 0.00005 | 0.00043 | Prim1         |
| NM_178576    | 1.28 | 0.01195 | 0.04798 | Cpsf4         |
| NM_178113    | 1.28 | 0.00300 | 0.01592 | Ncapd3        |
| NM_008817    | 1.28 | 0.00005 | 0.00043 | Peg3          |
| NM_028128    | 1.28 | 0.00005 | 0.00043 | Rfc5          |
| NM_009320    | 1.28 | 0.00005 | 0.00043 | Slc6a6        |
| NM_001136082 | 1.27 | 0.00005 | 0.00043 | Timeless      |

|              |      |         |         |               |
|--------------|------|---------|---------|---------------|
| NM_009516    | 1.27 | 0.00005 | 0.00043 | Wee1          |
| NM_025492    | 1.27 | 0.00020 | 0.00154 | 1700020L24Rik |
| NM_021790    | 1.27 | 0.00410 | 0.02055 | Cenpk         |
| NM_011427    | 1.27 | 0.00005 | 0.00043 | Snail         |
| NM_001271566 | 1.27 | 0.00005 | 0.00043 | Cdc7          |
| NM_001167730 | 1.27 | 0.00005 | 0.00043 | Rad18         |
| NM_080640    | 1.26 | 0.00005 | 0.00043 | Baalc         |
| NM_201364    | 1.26 | 0.00005 | 0.00043 | BC055324      |
| NM_027852    | 1.26 | 0.00005 | 0.00043 | Rarres2       |
| NM_011634    | 1.25 | 0.00005 | 0.00043 | Traip         |
| NM_025642    | 1.25 | 0.00005 | 0.00043 | Misl8a        |
| NM_001083188 | 1.25 | 0.00005 | 0.00043 | Lig1          |
| NM_172505    | 1.25 | 0.00005 | 0.00043 | A730008H23Rik |
| NM_145946    | 1.25 | 0.00005 | 0.00043 | Fanci         |
| NM_199467    | 1.25 | 0.00005 | 0.00043 | Mms221        |
| NM_184109    | 1.25 | 0.00005 | 0.00043 | Rt11          |
| NM_009285    | 1.24 | 0.00005 | 0.00043 | Stc1          |
| NM_007633    | 1.24 | 0.00005 | 0.00043 | Ccne1         |
| NM_001081317 | 1.24 | 0.00005 | 0.00043 | Zfand4        |
| NM_027871    | 1.24 | 0.00005 | 0.00043 | Arhgef3       |
| NM_001271614 | 1.24 | 0.00005 | 0.00043 | Fen1          |
| NM_001113350 | 1.24 | 0.00025 | 0.00187 | Xkr5          |
| NM_139197    | 1.24 | 0.00905 | 0.03830 | Gbgt1         |
| NM_133762    | 1.23 | 0.00005 | 0.00043 | Ncapg2        |
| NM_183208    | 1.23 | 0.00005 | 0.00043 | Zmiz1         |
| NM_134000    | 1.23 | 0.00035 | 0.00251 | Traf3ip2      |
| NM_001278115 | 1.22 | 0.00005 | 0.00043 | Ube2t         |
| NM_010791    | 1.22 | 0.00005 | 0.00043 | Meox1         |
| NM_180588    | 1.22 | 0.00005 | 0.00043 | Reep4         |
| NM_146061    | 1.22 | 0.00005 | 0.00043 | Prr5          |
| NM_028829    | 1.22 | 0.00005 | 0.00043 | Paqr8         |
| NM_021793    | 1.22 | 0.00005 | 0.00043 | Tmem8         |
| NM_001168318 | 1.22 | 0.00005 | 0.00043 | Scara5        |
| NM_183297    | 1.21 | 0.00615 | 0.02830 | Nxph4         |
| NM_013691    | 1.21 | 0.00005 | 0.00043 | Thbs3         |
| NM_021288    | 1.21 | 0.00005 | 0.00043 | Tyms          |
| NM_080850    | 1.21 | 0.00005 | 0.00043 | Pask          |
| NM_133687    | 1.21 | 0.00005 | 0.00043 | Cxxc5         |
| NM_024241    | 1.21 | 0.00005 | 0.00043 | Kif24         |
| NM_028679    | 1.21 | 0.00005 | 0.00043 | Irak3         |
| NM_001033550 | 1.21 | 0.00005 | 0.00043 | Lrrc8b        |
| NM_177603    | 1.20 | 0.00740 | 0.03279 | Frat2         |
| NM_001163471 | 1.20 | 0.00005 | 0.00043 | Hectd2        |
| NM_001174155 | 1.20 | 0.00035 | 0.00251 | Rasgrp4       |
| NM_011015    | 1.19 | 0.00005 | 0.00043 | Orc1          |
| NM_001242396 | 1.19 | 0.00005 | 0.00043 | Jmjd1c        |
| NM_001042527 | 1.19 | 0.00005 | 0.00043 | Blm           |
| NM_001111075 | 1.18 | 0.00005 | 0.00043 | Cdc25b        |
| NM_007691    | 1.18 | 0.00015 | 0.00119 | Chek1         |
| NM_001040631 | 1.18 | 0.00005 | 0.00043 | C1qtnf5       |
| NM_001161665 | 1.18 | 0.00005 | 0.00043 | Kif26b        |
| NM_001080929 | 1.18 | 0.00005 | 0.00043 | Cdr21         |
| NM_020567    | 1.17 | 0.00005 | 0.00043 | Gmn           |
| NM_025928    | 1.17 | 0.00005 | 0.00043 | Pmf1          |
| NM_144881    | 1.17 | 0.00005 | 0.00043 | Hhat          |
| NM_001204915 | 1.17 | 0.00005 | 0.00043 | Reep3         |
| NM_008563    | 1.16 | 0.00005 | 0.00043 | Mcm3          |
| NM_175429    | 1.16 | 0.00005 | 0.00043 | Kctd12b       |
| NM_173396    | 1.16 | 0.00005 | 0.00043 | Tgif2         |
| NM_025590    | 1.16 | 0.00005 | 0.00043 | Acot11        |
| NM_025676    | 1.16 | 0.00005 | 0.00043 | Mcm8          |

|              |      |         |         |               |
|--------------|------|---------|---------|---------------|
| NM_028083    | 1.16 | 0.00005 | 0.00043 | Chaf1b        |
| NM_001042652 | 1.15 | 0.00005 | 0.00043 | Nusap1        |
| NM_022724    | 1.15 | 0.00005 | 0.00043 | Suv39h2       |
| NM_001162365 | 1.15 | 0.00115 | 0.00709 | Ptk2b         |
| NM_009016    | 1.15 | 0.00005 | 0.00043 | Raet1a        |
| NM_053204    | 1.15 | 0.00005 | 0.00043 | Erc1          |
| NM_001162932 | 1.15 | 0.00010 | 0.00082 | Rmi2          |
| NM_178932    | 1.15 | 0.00885 | 0.03762 | Aoc2          |
| NM_028175    | 1.14 | 0.00005 | 0.00043 | Lrrc8e        |
| NM_001103182 | 1.14 | 0.00005 | 0.00043 | Lin9          |
| NM_025853    | 1.13 | 0.00005 | 0.00043 | Dsn1          |
| NM_009542    | 1.13 | 0.00005 | 0.00043 | Zfp101        |
| NM_016710    | 1.13 | 0.00005 | 0.00043 | Hmgn5         |
| NM_008567    | 1.13 | 0.00005 | 0.00043 | Mcm6          |
| NM_008344    | 1.13 | 0.00005 | 0.00043 | Igfbp6        |
| NM_010387    | 1.13 | 0.00005 | 0.00043 | H2-DMB1       |
| NM_001081091 | 1.12 | 0.00005 | 0.00043 | Cep152        |
| NM_001040111 | 1.12 | 0.00005 | 0.00043 | Arap1         |
| NR_015556    | 1.12 | 0.00095 | 0.00602 | 2610035D17Rik |
| NM_011854    | 1.12 | 0.00320 | 0.01678 | Oasl2         |
| NM_001081249 | 1.12 | 0.00005 | 0.00043 | Vcan          |
| NM_016782    | 1.12 | 0.00130 | 0.00786 | Cntnap1       |
| NM_001005341 | 1.12 | 0.00005 | 0.00043 | Ypel2         |
| NM_001252600 | 1.12 | 0.00345 | 0.01785 | Irf7          |
| NM_011131    | 1.11 | 0.00005 | 0.00043 | Pold1         |
| NM_001162537 | 1.11 | 0.00005 | 0.00043 | 9330159F19Rik |
| NM_001193305 | 1.11 | 0.00005 | 0.00043 | Mical2        |
| NM_001081001 | 1.11 | 0.00005 | 0.00043 | Brca2         |
| NM_013778    | 1.11 | 0.00105 | 0.00655 | Akr1c13       |
| NM_177710    | 1.10 | 0.00005 | 0.00043 | Ssh2          |
| NM_019483    | 1.10 | 0.00055 | 0.00376 | Smad9         |
| NM_174848    | 1.10 | 0.00005 | 0.00043 | Crybg3        |
| NM_001276248 | 1.10 | 0.00005 | 0.00043 | Cp            |
| NM_001113211 | 1.09 | 0.00005 | 0.00043 | Tmem194       |
| NM_013673    | 1.09 | 0.00005 | 0.00043 | Sp100         |
| NM_001139516 | 1.09 | 0.00005 | 0.00043 | Rbl1          |
| NM_001025365 | 1.09 | 0.00005 | 0.00043 | Miip          |
| NM_011962    | 1.09 | 0.00005 | 0.00043 | Plod3         |
| NM_177702    | 1.09 | 0.00125 | 0.00762 | 4833427G06Rik |
| NM_008892    | 1.09 | 0.00005 | 0.00043 | Polal         |
| NM_016756    | 1.09 | 0.00005 | 0.00043 | Cdk2          |
| NM_001081445 | 1.08 | 0.00005 | 0.00043 | Ncam1         |
| NM_001003960 | 1.08 | 0.00005 | 0.00043 | Dnmt3b        |
| NM_033602    | 1.08 | 0.00005 | 0.00043 | Peli2         |
| NM_028266    | 1.07 | 0.00005 | 0.00043 | Coll6a1       |
| NM_001077398 | 1.07 | 0.00005 | 0.00043 | Ldb2          |
| NM_027556    | 1.07 | 0.00005 | 0.00043 | Cep192        |
| NM_001033378 | 1.07 | 0.00020 | 0.00154 | A430078G23Rik |
| NM_019518    | 1.06 | 0.00005 | 0.00043 | Grasp         |
| NM_001025163 | 1.06 | 0.00020 | 0.00154 | Zfp78         |
| NM_009895    | 1.06 | 0.00005 | 0.00043 | Cish          |
| NM_016681    | 1.05 | 0.00005 | 0.00043 | Chek2         |
| NM_009378    | 1.05 | 0.00005 | 0.00043 | Thbd          |
| NR_033599    | 1.05 | 0.00005 | 0.00043 | Gm6682        |
| NM_030889    | 1.05 | 0.00005 | 0.00043 | Sorcs2        |
| NM_172134    | 1.04 | 0.00005 | 0.00043 | Pdxk          |
| NM_001081364 | 1.04 | 0.00005 | 0.00043 | Arhgap21      |
| NM_001146174 | 1.04 | 0.00005 | 0.00043 | Rangap1       |
| NM_001115010 | 1.04 | 0.00005 | 0.00043 | Lin54         |
| NM_021305    | 1.03 | 0.00005 | 0.00043 | Sec61a2       |
| NM_053072    | 1.03 | 0.00005 | 0.00043 | Fgd6          |

|              |       |         |         |            |
|--------------|-------|---------|---------|------------|
| NM_172911    | 1.03  | 0.00005 | 0.00043 | D8Erttd82e |
| NM_175382    | 1.03  | 0.01220 | 0.04880 | Fam72a     |
| NM_021361    | 1.03  | 0.00005 | 0.00043 | Nova1      |
| NM_022312    | 1.03  | 0.00005 | 0.00043 | Tnr        |
| NM_001040691 | 1.02  | 0.00005 | 0.00043 | Ung        |
| NM_134024    | 1.02  | 0.00005 | 0.00043 | Tubg1      |
| NM_011858    | 1.02  | 0.00005 | 0.00043 | Tenn4      |
| NM_177409    | 1.02  | 0.00005 | 0.00043 | Tram2      |
| NM_173386    | 1.02  | 0.00005 | 0.00043 | Mb21d1     |
| NM_001039150 | 1.02  | 0.00005 | 0.00043 | Cd44       |
| NM_001168304 | 1.02  | 0.00005 | 0.00043 | Cdk19      |
| NM_011284    | 1.02  | 0.00005 | 0.00043 | Rpa2       |
| NM_008548    | 1.02  | 0.00005 | 0.00043 | Man1a      |
| NM_001285945 | 1.02  | 0.00005 | 0.00043 | Zranb3     |
| NM_153287    | 1.01  | 0.00050 | 0.00346 | Csrnp1     |
| NM_030198    | 1.01  | 0.00005 | 0.00043 | Gins3      |
| NM_001172472 | 1.01  | 0.00005 | 0.00043 | Sphk1      |
| NM_008565    | 1.01  | 0.00005 | 0.00043 | Mcm4       |
| NM_008922    | 1.01  | 0.00005 | 0.00043 | Prim2      |
| NM_001272057 | 1.01  | 0.00305 | 0.01611 | Adam5      |
| NM_001282992 | 1.01  | 0.00005 | 0.00043 | Pent       |
| NM_011625    | 1.00  | 0.00005 | 0.00043 | Ppp1r13b   |
| NM_009103    | 1.00  | 0.00005 | 0.00043 | Rrm1       |
| NM_018827    | 1.00  | 0.00005 | 0.00043 | Cr1f1      |
| NM_177271    | 1.00  | 0.00005 | 0.00043 | Samd5      |
| NM_026640    | 1.00  | 0.00005 | 0.00043 | Fam111a    |
| NM_001040397 | -1.00 | 0.00005 | 0.00043 | Filip11    |
| NM_181344    | -1.00 | 0.00005 | 0.00043 | Clr1       |
| NM_153529    | -1.00 | 0.00005 | 0.00043 | Nrn1       |
| NM_027950    | -1.01 | 0.00005 | 0.00043 | Osgin1     |
| NM_001136086 | -1.02 | 0.00005 | 0.00043 | Dpys13     |
| NM_007739    | -1.02 | 0.00005 | 0.00043 | Col8a1     |
| NM_012030    | -1.02 | 0.00005 | 0.00043 | Slc9a3r1   |
| NM_130449    | -1.02 | 0.00005 | 0.00043 | Colec12    |
| NM_001159394 | -1.03 | 0.00005 | 0.00043 | Nfkbiz     |
| NM_153782    | -1.03 | 0.00005 | 0.00043 | Fam20a     |
| NM_001081277 | -1.03 | 0.00290 | 0.01545 | Ak5        |
| NM_001252059 | -1.03 | 0.00005 | 0.00043 | Cacna1a    |
| NM_001256081 | -1.03 | 0.00005 | 0.00043 | Myo7a      |
| NM_001160112 | -1.03 | 0.00005 | 0.00043 | Foxg1      |
| NM_001081433 | -1.04 | 0.00005 | 0.00043 | Ankrd44    |
| NM_175454    | -1.05 | 0.00455 | 0.02225 | Hid1       |
| NM_001042779 | -1.06 | 0.00005 | 0.00043 | Sema3b     |
| NM_026235    | -1.07 | 0.00405 | 0.02036 | Larp6      |
| NM_009368    | -1.07 | 0.00005 | 0.00043 | Tgfb3      |
| NM_001252568 | -1.07 | 0.00005 | 0.00043 | Phyhd1     |
| NM_001204201 | -1.07 | 0.00005 | 0.00043 | Spp1       |
| NM_001281527 | -1.08 | 0.00005 | 0.00043 | Gm7361     |
| NM_025770    | -1.08 | 0.00005 | 0.00043 | Atg10      |
| NM_023386    | -1.09 | 0.00840 | 0.03620 | Rtp4       |
| NM_001109988 | -1.09 | 0.00005 | 0.00043 | Nrep       |
| NM_133764    | -1.09 | 0.00005 | 0.00043 | Atp6v0e2   |
| NM_019967    | -1.09 | 0.00005 | 0.00043 | Brinp1     |
| NM_145144    | -1.09 | 0.00005 | 0.00043 | Aif11      |
| NM_054056    | -1.09 | 0.00005 | 0.00043 | Pawr       |
| NM_144896    | -1.10 | 0.00005 | 0.00043 | Pet112     |
| NM_001136077 | -1.10 | 0.00005 | 0.00043 | Enpp2      |
| NM_001081756 | -1.10 | 0.00025 | 0.00187 | Nckap5     |
| NM_029568    | -1.11 | 0.00005 | 0.00043 | Mfap4      |
| NR_045098    | -1.12 | 0.00005 | 0.00043 | Gm2115     |
| NM_001271531 | -1.12 | 0.00005 | 0.00043 | Insig2     |

|              |       |         |         |               |
|--------------|-------|---------|---------|---------------|
| NM_020578    | -1.12 | 0.00005 | 0.00043 | Ehd3          |
| NM_013495    | -1.13 | 0.00005 | 0.00043 | Cpt1a         |
| NM_019919    | -1.13 | 0.00005 | 0.00043 | Ltbp1         |
| NM_019759    | -1.14 | 0.00005 | 0.00043 | Dpt           |
| NM_010774    | -1.15 | 0.00005 | 0.00043 | Mbd4          |
| NM_178591    | -1.17 | 0.00005 | 0.00043 | Nrg1          |
| NM_054041    | -1.17 | 0.00005 | 0.00043 | Antxr1        |
| NM_013467    | -1.18 | 0.00005 | 0.00043 | Aldh1a1       |
| NM_028561    | -1.18 | 0.00005 | 0.00043 | Speer4b       |
| NM_009189    | -1.18 | 0.00005 | 0.00043 | Six1          |
| NM_001025602 | -1.20 | 0.00005 | 0.00043 | I11r11        |
| NM_023455    | -1.20 | 0.00005 | 0.00043 | Nat8          |
| NM_025427    | -1.20 | 0.00005 | 0.00043 | Rgcc          |
| NM_007562    | -1.20 | 0.00005 | 0.00043 | Bnc1          |
| NM_182808    | -1.20 | 0.00005 | 0.00043 | Fam19a1       |
| NM_001081169 | -1.21 | 0.00215 | 0.01202 | Aspg          |
| NM_001013019 | -1.21 | 0.00005 | 0.00043 | Lrrn4c1       |
| NM_013654    | -1.21 | 0.00005 | 0.00043 | Cc17          |
| NM_001135100 | -1.22 | 0.00005 | 0.00043 | I134          |
| NM_027759    | -1.23 | 0.00775 | 0.03396 | Fsip1         |
| NM_009121    | -1.23 | 0.00005 | 0.00043 | Sat1          |
| NM_001044740 | -1.23 | 0.00005 | 0.00043 | Slc7a2        |
| NM_001177810 | -1.23 | 0.00005 | 0.00043 | Rapgef3       |
| NM_177157    | -1.24 | 0.00005 | 0.00043 | Gchfr         |
| NM_001081307 | -1.24 | 0.00005 | 0.00043 | Ppp1r12b      |
| NM_001077189 | -1.26 | 0.00815 | 0.03537 | Fcgr2b        |
| NM_001190911 | -1.26 | 0.00005 | 0.00043 | Kirrel3       |
| NM_009154    | -1.27 | 0.00005 | 0.00043 | Sema5a        |
| NM_001271483 | -1.27 | 0.00005 | 0.00043 | Clip4         |
| NM_170779    | -1.27 | 0.00005 | 0.00043 | Wwc1          |
| NM_010415    | -1.28 | 0.00005 | 0.00043 | Hbegf         |
| NM_008349    | -1.28 | 0.00005 | 0.00043 | I110rb        |
| NR_033474    | -1.29 | 0.00005 | 0.00043 | 2810433D01Rik |
| NM_148951    | -1.29 | 0.00035 | 0.00251 | Gipc3         |
| NM_001113553 | -1.30 | 0.00005 | 0.00043 | Irak2         |
| NM_001177319 | -1.31 | 0.00005 | 0.00043 | Tfpi          |
| NM_001254747 | -1.32 | 0.00915 | 0.03867 | I115          |
| NM_173008    | -1.33 | 0.00005 | 0.00043 | Ssc5d         |
| NM_174857    | -1.33 | 0.00005 | 0.00043 | Mamdc2        |
| NM_026416    | -1.34 | 0.00025 | 0.00187 | S100a16       |
| NM_001083810 | -1.34 | 0.00005 | 0.00043 | Prr51         |
| NM_013653    | -1.34 | 0.00010 | 0.00082 | Cc15          |
| NM_001272078 | -1.35 | 0.00005 | 0.00043 | Trem2         |
| NM_015759    | -1.36 | 0.00005 | 0.00043 | Fgd3          |
| NM_001145965 | -1.36 | 0.00005 | 0.00043 | Dlgap2        |
| NM_130858    | -1.37 | 0.00725 | 0.03227 | Nxph3         |
| NM_181390    | -1.37 | 0.00005 | 0.00043 | Mustn1        |
| NM_013602    | -1.38 | 0.00005 | 0.00043 | Mt1           |
| NM_001286653 | -1.39 | 0.00005 | 0.00043 | Rcan2         |
| NM_007498    | -1.39 | 0.00005 | 0.00043 | Atf3          |
| NM_153170    | -1.40 | 0.00110 | 0.00681 | Slc36a2       |
| NM_001112813 | -1.40 | 0.00005 | 0.00043 | Cacnalg       |
| NM_001285890 | -1.41 | 0.00005 | 0.00043 | Pdelb         |
| NM_026436    | -1.42 | 0.00005 | 0.00043 | Tmem86a       |
| NM_007413    | -1.42 | 0.00005 | 0.00043 | Adora2b       |
| NM_009369    | -1.42 | 0.00005 | 0.00043 | Tgfb1         |
| NM_001166580 | -1.44 | 0.00005 | 0.00043 | 8430408G22Rik |
| NM_009141    | -1.44 | 0.00005 | 0.00043 | Cxcl5         |
| NM_001103177 | -1.44 | 0.00005 | 0.00043 | Ablim1        |
| NM_001285956 | -1.44 | 0.00100 | 0.00627 | Podn          |
| NM_001163015 | -1.45 | 0.00005 | 0.00043 | Gprasp2       |

|              |       |         |         |               |
|--------------|-------|---------|---------|---------------|
| NM_008973    | -1.46 | 0.00005 | 0.00043 | Ptn           |
| NM_001164316 | -1.47 | 0.00005 | 0.00043 | Ccser1        |
| NM_053109    | -1.48 | 0.00005 | 0.00043 | Clec2d        |
| NM_001039220 | -1.48 | 0.00005 | 0.00043 | AI429214      |
| NM_001172424 | -1.49 | 0.00005 | 0.00043 | Dhrs3         |
| NM_001243072 | -1.51 | 0.00005 | 0.00043 | Sema3a        |
| NM_138649    | -1.51 | 0.01005 | 0.04170 | Syt17         |
| NM_011766    | -1.51 | 0.00005 | 0.00043 | Zfpm2         |
| NM_001112725 | -1.53 | 0.00325 | 0.01700 | Aldh3a1       |
| NM_175271    | -1.53 | 0.00005 | 0.00043 | Lpar4         |
| NM_010930    | -1.53 | 0.00005 | 0.00043 | Nov           |
| NM_010235    | -1.53 | 0.00130 | 0.00786 | Fosl1         |
| NM_009162    | -1.56 | 0.00820 | 0.03552 | Scg5          |
| NM_007392    | -1.56 | 0.00005 | 0.00043 | Acta2         |
| NM_173007    | -1.57 | 0.00005 | 0.00043 | Tspan12       |
| NM_008630    | -1.58 | 0.00005 | 0.00043 | Mt2           |
| NM_001039094 | -1.59 | 0.00005 | 0.00043 | Negr1         |
| NM_008046    | -1.59 | 0.00005 | 0.00043 | Fst           |
| NM_001194940 | -1.59 | 0.00005 | 0.00043 | Dlc1          |
| NM_177191    | -1.59 | 0.00010 | 0.00082 | Sycp2         |
| NM_011580    | -1.60 | 0.00005 | 0.00043 | Thbs1         |
| NM_008086    | -1.60 | 0.00005 | 0.00043 | Gas1          |
| NM_139300    | -1.61 | 0.00005 | 0.00043 | Myk           |
| NM_010111    | -1.63 | 0.00005 | 0.00043 | Efnb2         |
| NM_009846    | -1.64 | 0.00005 | 0.00043 | Cd24a         |
| NM_001167828 | -1.65 | 0.00005 | 0.00043 | Trim30d       |
| NM_009721    | -1.65 | 0.00005 | 0.00043 | Atp1b1        |
| NM_145467    | -1.67 | 0.00005 | 0.00043 | Itgb11        |
| NM_009062    | -1.68 | 0.00005 | 0.00043 | Rgs4          |
| NM_138654    | -1.71 | 0.00810 | 0.03519 | 5033411D12Rik |
| NM_008404    | -1.72 | 0.00005 | 0.00043 | Itgb2         |
| NM_013468    | -1.72 | 0.00005 | 0.00043 | Ankrd1        |
| NM_001195084 | -1.72 | 0.00005 | 0.00043 | Plscr2        |
| NM_008176    | -1.73 | 0.00005 | 0.00043 | Cxcl1         |
| NM_170778    | -1.73 | 0.00005 | 0.00043 | Dpyd          |
| NM_001042660 | -1.73 | 0.00005 | 0.00043 | Smad7         |
| NM_019564    | -1.74 | 0.00130 | 0.00786 | Htral         |
| NM_016873    | -1.74 | 0.00005 | 0.00043 | Wisp2         |
| NM_008491    | -1.75 | 0.00005 | 0.00043 | Lcn2          |
| NM_172118    | -1.76 | 0.00005 | 0.00043 | My19          |
| NM_001033228 | -1.80 | 0.00020 | 0.00154 | Itgal         |
| NM_007621    | -1.80 | 0.00005 | 0.00043 | Cbr2          |
| NM_001013833 | -1.82 | 0.00100 | 0.00627 | Prkg1         |
| NR_036452    | -1.84 | 0.00005 | 0.00043 | E230016K23Rik |
| NM_031393    | -1.85 | 0.00745 | 0.03296 | Syt11         |
| NM_011333    | -1.85 | 0.00005 | 0.00043 | Ccl2          |
| NM_144556    | -1.86 | 0.00815 | 0.03537 | Lgi4          |
| NM_001039048 | -1.87 | 0.00015 | 0.00119 | Trim63        |
| NM_001199210 | -1.87 | 0.00005 | 0.00043 | Evalc         |
| NM_016689    | -1.89 | 0.00015 | 0.00119 | Aqp3          |
| NM_025404    | -1.90 | 0.00180 | 0.01036 | Arl4d         |
| NM_172393    | -1.91 | 0.00005 | 0.00043 | Aim1          |
| NM_026821    | -1.93 | 0.00005 | 0.00043 | Lurap11       |
| NM_013743    | -1.93 | 0.00005 | 0.00043 | Pdk4          |
| NR_040287    | -1.95 | 0.00040 | 0.00284 | A730020E08Rik |
| NR_026733    | -1.95 | 0.00005 | 0.00043 | 3110039M20Rik |
| NM_001008424 | -1.96 | 0.00005 | 0.00043 | Cdsn          |
| NM_198656    | -1.97 | 0.00005 | 0.00043 | Cdh26         |
| NM_001038839 | -2.01 | 0.00005 | 0.00043 | P2rx7         |
| NM_023048    | -2.03 | 0.00005 | 0.00043 | Asb4          |
| NM_176933    | -2.03 | 0.00005 | 0.00043 | Dusp4         |

|              |       |         |         |               |
|--------------|-------|---------|---------|---------------|
| NR_045079    | -2.09 | 0.00005 | 0.00043 | 3300005D01Rik |
| NM_172799    | -2.14 | 0.00005 | 0.00043 | Tt116         |
| NR_045905    | -2.15 | 0.00880 | 0.03750 | 2700069I18Rik |
| NM_009610    | -2.17 | 0.00230 | 0.01272 | Actg2         |
| NM_001172481 | -2.19 | 0.00005 | 0.00043 | Aspn          |
| NM_030728    | -2.23 | 0.00005 | 0.00043 | 9930013L23Rik |
| NM_010104    | -2.30 | 0.00010 | 0.00082 | Edn1          |
| NM_007759    | -2.35 | 0.00185 | 0.01061 | Crabp2        |
| NM_024406    | -2.36 | 0.00005 | 0.00043 | Fabp4         |
| NM_011077    | -2.37 | 0.00005 | 0.00043 | Phex          |
| NM_009701    | -2.44 | 0.00060 | 0.00405 | Aqp5          |
| NM_013657    | -2.47 | 0.00005 | 0.00043 | Sema3c        |
| NM_009655    | -2.50 | 0.00005 | 0.00043 | Alcam         |
| NM_011526    | -2.50 | 0.00005 | 0.00043 | Tagln         |
| NM_001037987 | -2.57 | 0.00005 | 0.00043 | Edil3         |
| NM_001013764 | -2.57 | 0.00030 | 0.00221 | Ces1a         |
| NM_008904    | -2.67 | 0.00005 | 0.00043 | Ppargcla      |
| NM_021355    | -2.71 | 0.00005 | 0.00043 | Fmod          |
| NM_001042615 | -2.72 | 0.00005 | 0.00043 | Htra3         |
| NM_020581    | -2.78 | 0.00005 | 0.00043 | Angpt14       |
| NM_053106    | -2.89 | 0.00005 | 0.00043 | Lmod1         |
| NM_010228    | -2.90 | 0.00005 | 0.00043 | Flt1          |
| NM_011921    | -2.95 | 0.00005 | 0.00043 | Aldh1a7       |
| NM_080639    | -2.99 | 0.00005 | 0.00043 | Timp4         |
| NM_023608    | -3.00 | 0.00005 | 0.00043 | Gdpd2         |
| NM_008555    | -3.08 | 0.01035 | 0.04274 | Masp1         |
| NM_008760    | -3.17 | 0.00005 | 0.00043 | Ogn           |
| NM_011338    | -3.18 | 0.00005 | 0.00043 | Cc19          |
| NM_008862    | -3.20 | 0.00005 | 0.00043 | Pkia          |
| NM_026271    | -3.26 | 0.00005 | 0.00043 | Fibin         |
| NM_023850    | -3.68 | 0.00430 | 0.02134 | Chst1         |
| NM_001039934 | -3.85 | 0.00005 | 0.00043 | Map2          |
| NM_011891    | -3.88 | 0.00005 | 0.00043 | Sgcd          |
| NM_177346    | -4.55 | 0.00005 | 0.00043 | Gpr149        |

Hedgehog vs Esrrb+Hedgehog

| gene         | log2(fold_change) | p_value | q_value | Gene Symbol   |
|--------------|-------------------|---------|---------|---------------|
| NM_001110009 | #NAME?            | 0.00385 | 0.04057 | Apoc1         |
| NM_009197    | 5.71              | 0.00005 | 0.00106 | Slc16a2       |
| NM_009244    | 5.11              | 0.00145 | 0.01869 | Serpinalb     |
| NM_029509    | 4.76              | 0.00070 | 0.01027 | Gbp8          |
| NM_001252569 | 4.17              | 0.00005 | 0.00106 | Serpinala     |
| NM_001145807 | 3.77              | 0.00005 | 0.00106 | Brinp3        |
| NM_176973    | 3.52              | 0.00060 | 0.00905 | Podx12        |
| NM_001198811 | 3.37              | 0.00005 | 0.00106 | Frem1         |
| NM_001256005 | 3.24              | 0.00005 | 0.00106 | Gbp4          |
| NM_152803    | 3.08              | 0.00010 | 0.00196 | Hpse          |
| NM_009144    | 3.07              | 0.00005 | 0.00106 | Sfrp2         |
| NM_010266    | 3.03              | 0.00005 | 0.00106 | Gda           |
| NM_001024139 | 3.00              | 0.00005 | 0.00106 | Adamts15      |
| NM_001037909 | 2.97              | 0.00005 | 0.00106 | C130026I21Rik |
| NM_009285    | 2.92              | 0.00005 | 0.00106 | Stc1          |
| NM_033616    | 2.83              | 0.00005 | 0.00106 | Csprs         |
| NM_029472    | 2.79              | 0.00465 | 0.04687 | Gstt4         |
| NM_153131    | 2.71              | 0.00005 | 0.00106 | Unc5a         |
| NM_007730    | 2.68              | 0.00005 | 0.00106 | Coll2a1       |
| NM_008270    | 2.51              | 0.00005 | 0.00106 | Hoxb9         |
| NM_008821    | 2.48              | 0.00035 | 0.00578 | Pet2          |
| NM_007957    | 2.46              | 0.00435 | 0.04449 | Esx1          |
| NM_001164566 | 2.45              | 0.00005 | 0.00106 | Spats21       |
| NM_213615    | 2.43              | 0.00005 | 0.00106 | A530032D15Rik |



|              |      |         |         |               |
|--------------|------|---------|---------|---------------|
| NM_001285917 | 2.33 | 0.00005 | 0.00106 | Dapk1         |
| NM_027406    | 2.33 | 0.00155 | 0.01970 | Aldh1l1       |
| NM_030194    | 2.33 | 0.00015 | 0.00282 | Sp110         |
| NM_010050    | 2.25 | 0.00005 | 0.00106 | Dio2          |
| NM_183201    | 2.18 | 0.00005 | 0.00106 | Slfn5         |
| NR_027817    | 2.17 | 0.00050 | 0.00781 | 1500011B03Rik |
| NM_025658    | 2.15 | 0.00005 | 0.00106 | Ms4a4d        |
| NM_001104547 | 2.14 | 0.00480 | 0.04811 | Vmn2r96       |
| NM_001081746 | 2.12 | 0.00005 | 0.00106 | Gm7609        |
| NM_026142    | 2.07 | 0.00005 | 0.00106 | 3632451006Rik |
| NM_020509    | 2.03 | 0.00005 | 0.00106 | Retn1a        |
| NM_001146180 | 1.98 | 0.00005 | 0.00106 | Mtss1         |
| NM_022018    | 1.97 | 0.00005 | 0.00106 | Fam129a       |
| NM_025492    | 1.93 | 0.00005 | 0.00106 | 1700020L24Rik |
| NM_001079869 | 1.89 | 0.00025 | 0.00433 | Hoxb3         |
| NM_080435    | 1.89 | 0.00010 | 0.00196 | Adcy4         |
| NM_008709    | 1.82 | 0.00005 | 0.00106 | Mycn          |
| NM_022312    | 1.79 | 0.00005 | 0.00106 | Tnr           |
| NM_175332    | 1.75 | 0.00400 | 0.04176 | E130012A19Rik |
| NM_008744    | 1.72 | 0.00005 | 0.00106 | Ntn1          |
| NM_001039646 | 1.72 | 0.00005 | 0.00106 | Gbp10         |
| NM_013554    | 1.70 | 0.00070 | 0.01027 | Hoxd10        |
| NM_001164107 | 1.69 | 0.00065 | 0.00969 | Ripk3         |
| NM_001033249 | 1.69 | 0.00230 | 0.02699 | Zfp583        |
| NM_027852    | 1.65 | 0.00005 | 0.00106 | Rarres2       |
| NM_001128606 | 1.62 | 0.00005 | 0.00106 | Epb4.1        |
| NM_080453    | 1.62 | 0.00005 | 0.00106 | Mmp28         |
| NM_001098170 | 1.53 | 0.00005 | 0.00106 | Pcdh10        |
| NM_001039209 | 1.52 | 0.00005 | 0.00106 | Gm13152       |
| NM_001177752 | 1.48 | 0.00005 | 0.00106 | Pfkfb3        |
| NM_001122768 | 1.47 | 0.00005 | 0.00106 | Lrrc8d        |
| NM_001039647 | 1.46 | 0.00005 | 0.00106 | Gbp11         |
| NM_001122736 | 1.46 | 0.00005 | 0.00106 | Igf2          |
| NM_001039056 | 1.43 | 0.00005 | 0.00106 | Kcnj15        |
| NR_040297    | 1.41 | 0.00005 | 0.00106 | Gm19757       |
| NM_001009978 | 1.40 | 0.00075 | 0.01085 | Pdela         |
| NM_001039239 | 1.38 | 0.00005 | 0.00106 | Zfp808        |
| NM_011909    | 1.35 | 0.00380 | 0.04017 | Usp18         |
| NM_177839    | 1.34 | 0.00035 | 0.00578 | Tnn           |
| NM_027828    | 1.30 | 0.00005 | 0.00106 | Fam110c       |
| NM_011315    | 1.30 | 0.00005 | 0.00106 | Saa3          |
| NM_013555    | 1.29 | 0.00005 | 0.00106 | Hoxd9         |
| NM_001162365 | 1.29 | 0.00050 | 0.00781 | Ptk2b         |
| NM_033270    | 1.28 | 0.00125 | 0.01650 | E2f6          |
| NM_001111268 | 1.26 | 0.00005 | 0.00106 | Grik2         |
| NM_173781    | 1.26 | 0.00005 | 0.00106 | Rab6b         |
| NM_001163476 | 1.21 | 0.00005 | 0.00106 | Gins1         |
| NM_054098    | 1.18 | 0.00005 | 0.00106 | Steap4        |
| NM_172563    | 1.18 | 0.00005 | 0.00106 | Hlf           |
| NM_015790    | 1.18 | 0.00050 | 0.00781 | Icos1         |
| NM_011623    | 1.17 | 0.00005 | 0.00106 | Top2a         |
| NM_020557    | 1.15 | 0.00005 | 0.00106 | Cmpk2         |
| NM_021342    | 1.14 | 0.00005 | 0.00106 | Kcne4         |
| NM_178609    | 1.14 | 0.00005 | 0.00106 | E2f7          |
| NM_001014976 | 1.13 | 0.00005 | 0.00106 | Esp11         |
| NM_011121    | 1.13 | 0.00005 | 0.00106 | Plk1          |
| NM_019419    | 1.11 | 0.00005 | 0.00106 | Ar16ip1       |
| NM_024184    | 1.11 | 0.00005 | 0.00106 | Asf1b         |
| NM_001025779 | 1.10 | 0.00005 | 0.00106 | Cdc6          |
| NM_008958    | 1.10 | 0.00005 | 0.00106 | Ptch2         |
| NM_029415    | 1.10 | 0.00005 | 0.00106 | Slc10a6       |

|              |       |         |         |               |
|--------------|-------|---------|---------|---------------|
| NM_145588    | 1.10  | 0.00005 | 0.00106 | Kif22         |
| NM_134471    | 1.09  | 0.00005 | 0.00106 | Kif2c         |
| NM_009773    | 1.09  | 0.00005 | 0.00106 | Bub1b         |
| NM_172453    | 1.08  | 0.00005 | 0.00106 | Pif1          |
| NM_144786    | 1.07  | 0.00005 | 0.00106 | Ggt7          |
| NM_027290    | 1.07  | 0.00005 | 0.00106 | Mcm10         |
| NM_197959    | 1.07  | 0.00005 | 0.00106 | Kif18b        |
| NM_146208    | 1.06  | 0.00005 | 0.00106 | Neil3         |
| NM_016925    | 1.06  | 0.00005 | 0.00106 | Fanca         |
| NM_001163495 | 1.06  | 0.00005 | 0.00106 | Arhgap19      |
| NM_146238    | 1.06  | 0.00025 | 0.00433 | Gemin8        |
| NM_175554    | 1.06  | 0.00005 | 0.00106 | Clspn         |
| NM_008524    | 1.06  | 0.00005 | 0.00106 | Lum           |
| NM_172301    | 1.06  | 0.00005 | 0.00106 | Ccnb1         |
| NM_007708    | 1.06  | 0.00005 | 0.00106 | Cit           |
| NM_001003919 | 1.06  | 0.00005 | 0.00106 | Ddx11         |
| NM_175265    | 1.06  | 0.00005 | 0.00106 | Bora          |
| NM_001104550 | 1.05  | 0.00025 | 0.00433 | Vmn2r98       |
| NM_008276    | 1.05  | 0.00005 | 0.00106 | Hoxd8         |
| NM_001162506 | 1.05  | 0.00005 | 0.00106 | Troap         |
| NM_001081258 | 1.05  | 0.00005 | 0.00106 | Kif14         |
| NM_011858    | 1.05  | 0.00005 | 0.00106 | Tenm4         |
| NM_019759    | 1.05  | 0.00005 | 0.00106 | Dpt           |
| NM_028039    | 1.05  | 0.00005 | 0.00106 | Esco2         |
| NM_001168672 | 1.05  | 0.00005 | 0.00106 | Gtse1         |
| NM_172693    | 1.04  | 0.00005 | 0.00106 | Galnt12       |
| NM_029835    | 1.04  | 0.00005 | 0.00106 | Ticrr         |
| NM_008716    | 1.04  | 0.00005 | 0.00106 | Notch3        |
| NM_001080944 | 1.04  | 0.00025 | 0.00433 | Atp8b4        |
| NM_013673    | 1.04  | 0.00005 | 0.00106 | Sp100         |
| NM_001029838 | 1.04  | 0.00005 | 0.00106 | Pknox2        |
| NM_175314    | 1.03  | 0.00005 | 0.00106 | Adamts9       |
| NM_011497    | 1.03  | 0.00005 | 0.00106 | Aurka         |
| NM_011854    | 1.02  | 0.00485 | 0.04850 | Oasl2         |
| NM_001163793 | 1.02  | 0.00005 | 0.00106 | C530008M17Rik |
| NM_001033484 | 1.02  | 0.00005 | 0.00106 | Iqgap3        |
| NM_001271729 | 1.02  | 0.00005 | 0.00106 | Tk1           |
| NM_001167743 | 1.02  | 0.00005 | 0.00106 | Slfn8         |
| NM_139232    | 1.01  | 0.00005 | 0.00106 | Fgd4          |
| NM_008651    | 1.01  | 0.00005 | 0.00106 | Mybl1         |
| NM_011496    | 1.01  | 0.00005 | 0.00106 | Aurkb         |
| NM_199223    | 1.01  | 0.00005 | 0.00106 | Rtn4r12       |
| NM_008446    | 1.01  | 0.00005 | 0.00106 | Kif4          |
| NM_009185    | 1.01  | 0.00005 | 0.00106 | Stil          |
| NM_001081117 | 1.00  | 0.00005 | 0.00106 | Mki67         |
| NM_153544    | 1.00  | 0.00005 | 0.00106 | BC030867      |
| NM_001040397 | -1.00 | 0.00005 | 0.00106 | Filip11       |
| NM_019919    | -1.01 | 0.00005 | 0.00106 | Ltbpl         |
| NM_011338    | -1.04 | 0.00100 | 0.01377 | Ccl9          |
| NR_029439    | -1.04 | 0.00040 | 0.00645 | 1700018A04Rik |
| NM_001177319 | -1.05 | 0.00030 | 0.00510 | Tfpi          |
| NM_001164184 | -1.06 | 0.00025 | 0.00433 | Lsr           |
| NM_175454    | -1.08 | 0.00425 | 0.04382 | Hid1          |
| NM_019967    | -1.09 | 0.00005 | 0.00106 | Brinp1        |
| NM_029920    | -1.09 | 0.00005 | 0.00106 | Mtus2         |
| NM_007428    | -1.09 | 0.00045 | 0.00714 | Agt           |
| NM_139197    | -1.11 | 0.00020 | 0.00359 | Gbgt1         |
| NM_053106    | -1.11 | 0.00010 | 0.00196 | Lmod1         |
| NM_172118    | -1.11 | 0.00005 | 0.00106 | My19          |
| NM_025770    | -1.15 | 0.00005 | 0.00106 | Atg10         |
| NM_008046    | -1.15 | 0.00005 | 0.00106 | Fst           |

|              |       |         |         |               |
|--------------|-------|---------|---------|---------------|
| NM_029631    | -1.17 | 0.00005 | 0.00106 | Abhd14b       |
| NM_001164724 | -1.18 | 0.00005 | 0.00106 | I133          |
| NM_001083810 | -1.19 | 0.00005 | 0.00106 | Prr51         |
| NM_177819    | -1.20 | 0.00005 | 0.00106 | Fam135b       |
| NM_001085376 | -1.20 | 0.00005 | 0.00106 | Pappa2        |
| NM_020564    | -1.22 | 0.00135 | 0.01757 | Sult5a1       |
| NM_198656    | -1.22 | 0.00010 | 0.00196 | Cdh26         |
| NM_001008424 | -1.22 | 0.00005 | 0.00106 | Cdsn          |
| NM_007470    | -1.22 | 0.00005 | 0.00106 | Apod          |
| NM_013737    | -1.23 | 0.00005 | 0.00106 | Pla2g7        |
| NM_177191    | -1.23 | 0.00025 | 0.00433 | Sycp2         |
| NR_030484    | -1.24 | 0.00005 | 0.00106 | Mir703        |
| NM_023608    | -1.26 | 0.00005 | 0.00106 | Gdpd2         |
| NM_001286653 | -1.27 | 0.00005 | 0.00106 | Rcan2         |
| NM_009131    | -1.28 | 0.00005 | 0.00106 | Clec11a       |
| NM_024406    | -1.28 | 0.00350 | 0.03760 | Fabp4         |
| NM_018779    | -1.32 | 0.00005 | 0.00106 | Pde3a         |
| NM_001111073 | -1.32 | 0.00005 | 0.00106 | Fxyd5         |
| NM_001081169 | -1.33 | 0.00115 | 0.01541 | Aspg          |
| NM_011077    | -1.35 | 0.00085 | 0.01209 | Phex          |
| NM_001081006 | -1.36 | 0.00005 | 0.00106 | Et14          |
| NM_053191    | -1.37 | 0.00005 | 0.00106 | Pi15          |
| NM_011454    | -1.39 | 0.00110 | 0.01492 | Serpinb6b     |
| NM_029881    | -1.41 | 0.00005 | 0.00106 | Tmem200a      |
| NM_011921    | -1.41 | 0.00080 | 0.01148 | Aldh1a7       |
| NM_145467    | -1.43 | 0.00005 | 0.00106 | Itgb11        |
| NM_019866    | -1.46 | 0.00405 | 0.04221 | Spib          |
| NM_010228    | -1.47 | 0.00070 | 0.01027 | Flt1          |
| NR_045079    | -1.48 | 0.00005 | 0.00106 | 3300005D01Rik |
| NM_011766    | -1.49 | 0.00005 | 0.00106 | Zfpm2         |
| NM_008235    | -1.51 | 0.00005 | 0.00106 | Hes1          |
| NM_019503    | -1.52 | 0.00005 | 0.00106 | Fxyd1         |
| NM_001177881 | -1.52 | 0.00005 | 0.00106 | Mfap31        |
| NM_144799    | -1.53 | 0.00010 | 0.00196 | Lmcd1         |
| NM_010930    | -1.55 | 0.00005 | 0.00106 | Nov           |
| NM_007621    | -1.55 | 0.00005 | 0.00106 | Cbr2          |
| NM_028705    | -1.57 | 0.00005 | 0.00106 | Herc3         |
| NM_001163015 | -1.57 | 0.00005 | 0.00106 | Gprasp2       |
| NM_175271    | -1.58 | 0.00005 | 0.00106 | Lpar4         |
| NM_001159965 | -1.58 | 0.00005 | 0.00106 | Ralgps2       |
| NM_007729    | -1.61 | 0.00005 | 0.00106 | Col11a1       |
| NM_173007    | -1.62 | 0.00005 | 0.00106 | Tspan12       |
| NM_009846    | -1.62 | 0.00005 | 0.00106 | Cd24a         |
| NM_001112725 | -1.65 | 0.00115 | 0.01541 | Aldh3a1       |
| NM_023734    | -1.65 | 0.00155 | 0.01970 | Pi16          |
| NM_009548    | -1.66 | 0.00050 | 0.00781 | Rnf112        |
| NM_001285890 | -1.66 | 0.00005 | 0.00106 | Pde1b         |
| NM_001243072 | -1.70 | 0.00005 | 0.00106 | Sema3a        |
| NM_016917    | -1.71 | 0.00005 | 0.00106 | Slc40a1       |
| NM_009701    | -1.72 | 0.00335 | 0.03640 | Aqp5          |
| NM_138654    | -1.85 | 0.00380 | 0.04017 | 5033411D12Rik |
| NM_001001334 | -1.86 | 0.00155 | 0.01970 | BC061194      |
| NM_001194940 | -1.88 | 0.00005 | 0.00106 | Dlc1          |
| NM_001167828 | -1.90 | 0.00005 | 0.00106 | Trim30d       |
| NM_001033228 | -1.94 | 0.00005 | 0.00106 | Itgal         |
| NM_008005    | -1.95 | 0.00480 | 0.04811 | Fgf18         |
| NM_008760    | -1.96 | 0.00005 | 0.00106 | Ogn           |
| NM_170778    | -1.99 | 0.00005 | 0.00106 | Dpyd          |
| NM_001039094 | -2.06 | 0.00005 | 0.00106 | Negr1         |
| NM_001037987 | -2.09 | 0.00005 | 0.00106 | Edil3         |
| NM_001271705 | -2.10 | 0.00005 | 0.00106 | Pgf           |

|              |       |         |         |               |
|--------------|-------|---------|---------|---------------|
| NM_009655    | -2.12 | 0.00005 | 0.00106 | Alcam         |
| NM_008407    | -2.14 | 0.00155 | 0.01970 | Itih3         |
| NM_001039220 | -2.15 | 0.00005 | 0.00106 | AI429214      |
| NM_001172481 | -2.16 | 0.00005 | 0.00106 | Aspn          |
| NM_029568    | -2.17 | 0.00005 | 0.00106 | Mfap4         |
| NM_001285956 | -2.26 | 0.00005 | 0.00106 | Podn          |
| NM_001122595 | -2.45 | 0.00090 | 0.01268 | A630033H20Rik |
| NM_001284380 | -2.50 | 0.00040 | 0.00645 | Adra1b        |
| NM_013657    | -2.52 | 0.00005 | 0.00106 | Sema3c        |
| NM_008904    | -2.73 | 0.00005 | 0.00106 | Ppargcla      |
| NM_144556    | -2.98 | 0.00010 | 0.00196 | Lgi4          |
| NM_001166493 | -3.07 | 0.00025 | 0.00433 | Rasgrp3       |
| NM_026271    | -3.12 | 0.00005 | 0.00106 | Fibin         |
| NM_021355    | -3.27 | 0.00005 | 0.00106 | Fmod          |
| NM_023850    | -3.41 | 0.00275 | 0.03117 | Chst1         |
| NM_001256382 | -3.50 | 0.00005 | 0.00106 | Rims2         |
| NM_008862    | -3.54 | 0.00005 | 0.00106 | Pkia          |
| NM_011891    | -3.83 | 0.00005 | 0.00106 | Sgcd          |
| NM_001039934 | -4.21 | 0.00005 | 0.00106 | Map2          |
| NM_177346    | -4.25 | 0.00005 | 0.00106 | Gpr149        |

Esrrb vs Esrrb+Hedgehog

| gene         | log2(fold_change) | p_value | q_value | Gene Symbol   |
|--------------|-------------------|---------|---------|---------------|
| NM_028473    | inf               | 0.00005 | 0.00068 | 3110079015Rik |
| NM_028804    | inf               | 0.00005 | 0.00068 | Ccdc3         |
| NM_029472    | inf               | 0.00005 | 0.00068 | Gstt4         |
| NM_010296    | 8.87              | 0.00005 | 0.00068 | Gli1          |
| NM_020509    | 7.10              | 0.00005 | 0.00068 | Retnla        |
| NM_001044751 | 5.90              | 0.00005 | 0.00068 | Hsd11b1       |
| NM_025429    | 4.31              | 0.00005 | 0.00068 | Serpinb1a     |
| NM_008957    | 3.96              | 0.00005 | 0.00068 | Ptchl         |
| NM_008380    | 3.63              | 0.00005 | 0.00068 | Inhba         |
| NM_016867    | 3.61              | 0.00005 | 0.00068 | Gipc2         |
| NM_020557    | 3.48              | 0.00005 | 0.00068 | Cmpk2         |
| NM_009641    | 3.47              | 0.00005 | 0.00068 | Angpt4        |
| NM_001099276 | 3.30              | 0.00005 | 0.00068 | Pik3c2b       |
| NM_022657    | 3.30              | 0.00005 | 0.00068 | Fgf23         |
| NM_009117    | 3.22              | 0.00485 | 0.03874 | Saa1          |
| NM_007719    | 3.08              | 0.00110 | 0.01094 | Ccr7          |
| NM_016808    | 3.06              | 0.00005 | 0.00068 | Usp2          |
| NM_153137    | 2.97              | 0.00005 | 0.00068 | Traf3ip3      |
| NM_010517    | 2.94              | 0.00005 | 0.00068 | Igfbp4        |
| NM_015790    | 2.90              | 0.00015 | 0.00185 | Icos1         |
| NM_001177713 | 2.89              | 0.00005 | 0.00068 | Cyp26b1       |
| NM_011452    | 2.72              | 0.00090 | 0.00914 | Serpinb9b     |
| NM_010740    | 2.66              | 0.00005 | 0.00068 | Cd93          |
| NM_016854    | 2.65              | 0.00005 | 0.00068 | Ppp1r3c       |
| NM_010518    | 2.64              | 0.00005 | 0.00068 | Igfbp5        |
| NM_001033633 | 2.51              | 0.00005 | 0.00068 | Slc2a13       |
| NM_009382    | 2.47              | 0.00005 | 0.00068 | Thy1          |
| NM_007539    | 2.42              | 0.00005 | 0.00068 | Bdkrb1        |
| NM_138595    | 2.33              | 0.00115 | 0.01136 | Glde          |
| NM_001145886 | 2.22              | 0.00005 | 0.00068 | Tiam1         |
| NR_030721    | 2.20              | 0.00005 | 0.00068 | Foxd2os       |
| NM_011623    | 2.19              | 0.00005 | 0.00068 | Top2a         |
| NM_172756    | 2.17              | 0.00005 | 0.00068 | Ankle1        |
| NM_172564    | 2.16              | 0.00005 | 0.00068 | Tns4          |
| NM_001081085 | 2.15              | 0.00005 | 0.00068 | Sapcd2        |
| NM_001167680 | 2.14              | 0.00005 | 0.00068 | Rhbdf2        |
| NM_177343    | 2.13              | 0.00005 | 0.00068 | Camk1d        |
| NM_001081363 | 2.12              | 0.00005 | 0.00068 | Cenpf         |

|              |      |         |         |               |
|--------------|------|---------|---------|---------------|
| NM_001159518 | 2.11 | 0.00005 | 0.00068 | Igfbp7        |
| NR_037955    | 2.11 | 0.00005 | 0.00068 | 1190002F15Rik |
| NM_001164355 | 2.08 | 0.00005 | 0.00068 | Ska1          |
| NM_001195025 | 2.07 | 0.00005 | 0.00068 | Nuak2         |
| NM_146208    | 2.05 | 0.00005 | 0.00068 | Neil3         |
| NM_001160012 | 2.04 | 0.00020 | 0.00239 | Gjb3          |
| NM_172671    | 2.04 | 0.00005 | 0.00068 | Lgr4          |
| NM_001168318 | 2.02 | 0.00005 | 0.00068 | Scara5        |
| NM_001013377 | 2.01 | 0.00020 | 0.00239 | Arhgef39      |
| NM_001033141 | 2.01 | 0.00410 | 0.03386 | Ecscr         |
| NM_139197    | 2.01 | 0.00590 | 0.04548 | Gbgt1         |
| NM_019971    | 2.00 | 0.00005 | 0.00068 | Pdgfc         |
| NM_001081258 | 2.00 | 0.00005 | 0.00068 | Kif14         |
| NR_030721    | 2.00 | 0.00005 | 0.00068 | Foxd2os       |
| NM_001177752 | 2.00 | 0.00005 | 0.00068 | Pfkfb3        |
| NM_001081117 | 1.99 | 0.00005 | 0.00068 | Mki67         |
| NM_145356    | 1.99 | 0.00005 | 0.00068 | Zbtb7c        |
| NM_009931    | 1.99 | 0.00005 | 0.00068 | Col4a1        |
| NM_009791    | 1.96 | 0.00005 | 0.00068 | Aspm          |
| NM_029835    | 1.95 | 0.00005 | 0.00068 | Ticrr         |
| NM_008185    | 1.93 | 0.00005 | 0.00068 | Gstt1         |
| NM_001162506 | 1.92 | 0.00005 | 0.00068 | Troap         |
| NM_176982    | 1.92 | 0.00005 | 0.00068 | Fbxo48        |
| NR_015469    | 1.90 | 0.00005 | 0.00068 | 2810442I21Rik |
| NM_007695    | 1.90 | 0.00005 | 0.00068 | Chil1         |
| NM_001014976 | 1.88 | 0.00005 | 0.00068 | Esp11         |
| NM_001177794 | 1.87 | 0.00005 | 0.00068 | Sertad4       |
| NM_009437    | 1.87 | 0.00045 | 0.00496 | Tst           |
| NM_001281819 | 1.85 | 0.00005 | 0.00068 | Ace           |
| NM_009373    | 1.82 | 0.00005 | 0.00068 | Tgm2          |
| NM_001003919 | 1.82 | 0.00005 | 0.00068 | Ddx11         |
| NM_010790    | 1.81 | 0.00005 | 0.00068 | Melk          |
| NM_029617    | 1.81 | 0.00005 | 0.00068 | Casc5         |
| NM_011121    | 1.81 | 0.00005 | 0.00068 | Plk1          |
| NM_016851    | 1.80 | 0.00005 | 0.00068 | Irf6          |
| NM_153805    | 1.80 | 0.00015 | 0.00185 | Pkn3          |
| NM_008489    | 1.78 | 0.00005 | 0.00068 | Lbp           |
| NM_001042421 | 1.78 | 0.00005 | 0.00068 | Kntc1         |
| NM_198423    | 1.77 | 0.00005 | 0.00068 | Bahcc1        |
| NM_053173    | 1.77 | 0.00005 | 0.00068 | Kifc5b        |
| NM_001162533 | 1.77 | 0.00105 | 0.01049 | Sh3d21        |
| NM_009013    | 1.76 | 0.00005 | 0.00068 | Rad51ap1      |
| NM_134471    | 1.76 | 0.00005 | 0.00068 | Kif2c         |
| NM_026560    | 1.76 | 0.00005 | 0.00068 | Cdca8         |
| NM_013538    | 1.75 | 0.00005 | 0.00068 | Cdca3         |
| NR_001592    | 1.74 | 0.00005 | 0.00068 | H19           |
| NM_172301    | 1.73 | 0.00005 | 0.00068 | Cenb1         |
| NM_028039    | 1.73 | 0.00005 | 0.00068 | Esco2         |
| NM_009860    | 1.73 | 0.00005 | 0.00068 | Cdc25c        |
| NM_001199696 | 1.73 | 0.00005 | 0.00068 | Bai2          |
| NM_001033464 | 1.73 | 0.00005 | 0.00068 | Efcab4b       |
| NM_019753    | 1.72 | 0.00005 | 0.00068 | Cdh17         |
| NM_008651    | 1.72 | 0.00005 | 0.00068 | Mybl1         |
| NM_053191    | 1.72 | 0.00005 | 0.00068 | Pi15          |
| NM_031168    | 1.72 | 0.00005 | 0.00068 | I16           |
| NM_001110265 | 1.71 | 0.00005 | 0.00068 | Ttk           |
| NM_027975    | 1.68 | 0.00005 | 0.00068 | Fam83d        |
| NM_001013368 | 1.68 | 0.00005 | 0.00068 | E2f8          |
| NR_015556    | 1.67 | 0.00005 | 0.00068 | 2610035D17Rik |
| NM_173762    | 1.67 | 0.00005 | 0.00068 | Cenpe         |
| NM_023223    | 1.67 | 0.00005 | 0.00068 | Cdc20         |

|              |      |         |         |               |
|--------------|------|---------|---------|---------------|
| NM_080640    | 1.67 | 0.00010 | 0.00129 | Baalc         |
| NM_009252    | 1.67 | 0.00005 | 0.00068 | Serpina3n     |
| NM_010620    | 1.67 | 0.00005 | 0.00068 | Kif15         |
| NM_001113179 | 1.67 | 0.00005 | 0.00068 | Bub1          |
| NM_144553    | 1.66 | 0.00005 | 0.00068 | Dlgap5        |
| NM_001033331 | 1.65 | 0.00005 | 0.00068 | Gas213        |
| NM_017407    | 1.65 | 0.00005 | 0.00068 | Spag5         |
| NM_011496    | 1.65 | 0.00005 | 0.00068 | Aurkb         |
| NM_027182    | 1.64 | 0.00005 | 0.00068 | Trip13        |
| NM_028222    | 1.64 | 0.00005 | 0.00068 | Cdkn3         |
| NM_001271729 | 1.64 | 0.00005 | 0.00068 | Tk1           |
| NM_013552    | 1.64 | 0.00005 | 0.00068 | Hmmr          |
| NM_001113460 | 1.62 | 0.00005 | 0.00068 | Tec           |
| NM_011497    | 1.62 | 0.00005 | 0.00068 | Aurka         |
| NM_008021    | 1.61 | 0.00005 | 0.00068 | Foxm1         |
| NM_001141975 | 1.61 | 0.00005 | 0.00068 | Tpx2          |
| NM_009932    | 1.61 | 0.00005 | 0.00068 | Col4a2        |
| NM_181589    | 1.60 | 0.00005 | 0.00068 | Ckap21        |
| NM_146171    | 1.60 | 0.00005 | 0.00068 | Ncapd2        |
| NM_001163495 | 1.60 | 0.00005 | 0.00068 | Arhgap19      |
| NM_001285997 | 1.60 | 0.00005 | 0.00068 | Prc1          |
| NM_024245    | 1.60 | 0.00005 | 0.00068 | Kif23         |
| NM_007708    | 1.60 | 0.00005 | 0.00068 | Cit           |
| NM_008055    | 1.60 | 0.00005 | 0.00068 | Fzd4          |
| NM_023209    | 1.60 | 0.00005 | 0.00068 | Pbk           |
| NM_001172092 | 1.59 | 0.00005 | 0.00068 | Depdcl1a      |
| NM_178395    | 1.59 | 0.00045 | 0.00496 | Zdhhc2        |
| NM_181848    | 1.59 | 0.00005 | 0.00068 | Optn          |
| NM_009828    | 1.59 | 0.00005 | 0.00068 | Ccna2         |
| NM_009253    | 1.59 | 0.00005 | 0.00068 | Serpina3m     |
| NM_026785    | 1.58 | 0.00005 | 0.00068 | Ube2c         |
| NM_027290    | 1.58 | 0.00005 | 0.00068 | Mcm10         |
| NM_001163471 | 1.58 | 0.00005 | 0.00068 | Hectd2        |
| NM_001168672 | 1.58 | 0.00005 | 0.00068 | Gtsel         |
| NM_058214    | 1.57 | 0.00005 | 0.00068 | Recq14        |
| NM_144526    | 1.57 | 0.00005 | 0.00068 | Fam64a        |
| NM_029249    | 1.57 | 0.00005 | 0.00068 | Parpbbp       |
| NM_001195298 | 1.56 | 0.00005 | 0.00068 | Kifc1         |
| NM_010615    | 1.56 | 0.00005 | 0.00068 | Kif11         |
| NM_175554    | 1.56 | 0.00005 | 0.00068 | Clspn         |
| NM_197959    | 1.56 | 0.00005 | 0.00068 | Kif18b        |
| NM_134041    | 1.56 | 0.00005 | 0.00068 | 4930427A07Rik |
| NM_001199123 | 1.56 | 0.00005 | 0.00068 | Spc25         |
| NM_010892    | 1.55 | 0.00005 | 0.00068 | Nek2          |
| NM_028870    | 1.55 | 0.00005 | 0.00068 | Cltb          |
| NM_007681    | 1.55 | 0.00005 | 0.00068 | Cenpa         |
| NM_018827    | 1.55 | 0.00005 | 0.00068 | Crlf1         |
| NR_024720    | 1.55 | 0.00005 | 0.00068 | 2700099C18Rik |
| NM_001164362 | 1.55 | 0.00005 | 0.00068 | Cep55         |
| NM_001080158 | 1.54 | 0.00005 | 0.00068 | Cenpm         |
| NM_001033484 | 1.54 | 0.00005 | 0.00068 | Iqgap3        |
| NM_001081406 | 1.54 | 0.00165 | 0.01543 | Lrr1          |
| NM_139001    | 1.54 | 0.00005 | 0.00068 | Cspg4         |
| NM_001040435 | 1.53 | 0.00005 | 0.00068 | Tacc3         |
| NM_198654    | 1.53 | 0.00005 | 0.00068 | Nsl1          |
| NM_009773    | 1.53 | 0.00005 | 0.00068 | Bub1b         |
| NM_198605    | 1.53 | 0.00005 | 0.00068 | Ska3          |
| NM_009185    | 1.53 | 0.00005 | 0.00068 | Stil          |
| NM_001110162 | 1.53 | 0.00005 | 0.00068 | Cdca2         |
| NM_001012273 | 1.52 | 0.00005 | 0.00068 | Birc5         |
| NM_153762    | 1.52 | 0.00005 | 0.00068 | Rnf26         |

|              |      |         |         |               |
|--------------|------|---------|---------|---------------|
| NM_026412    | 1.51 | 0.00005 | 0.00068 | Knstrn        |
| NM_026778    | 1.51 | 0.00005 | 0.00068 | Cthrc1        |
| NM_008446    | 1.51 | 0.00005 | 0.00068 | Kif4          |
| NM_139303    | 1.51 | 0.00005 | 0.00068 | Kif18a        |
| NM_021886    | 1.51 | 0.00005 | 0.00068 | Cenph         |
| NM_175563    | 1.51 | 0.00005 | 0.00068 | Prr11         |
| NM_023294    | 1.51 | 0.00005 | 0.00068 | Ndc80         |
| NM_026507    | 1.50 | 0.00005 | 0.00068 | Zwilch        |
| NM_025979    | 1.49 | 0.00005 | 0.00068 | Mast1         |
| NM_001193305 | 1.49 | 0.00005 | 0.00068 | Mical2        |
| NM_001085549 | 1.49 | 0.00005 | 0.00068 | Trabd2b       |
| NM_016719    | 1.49 | 0.00005 | 0.00068 | Grb14         |
| NM_017370    | 1.49 | 0.00005 | 0.00068 | Hp            |
| NM_019438    | 1.49 | 0.00005 | 0.00068 | Ncapg         |
| NM_145924    | 1.49 | 0.00005 | 0.00068 | Cenpi         |
| NM_145588    | 1.48 | 0.00005 | 0.00068 | Kif22         |
| NM_178609    | 1.48 | 0.00005 | 0.00068 | E2f7          |
| NM_010050    | 1.48 | 0.00005 | 0.00068 | Dio2          |
| NM_026282    | 1.47 | 0.00005 | 0.00068 | Spc24         |
| NM_001172216 | 1.47 | 0.00105 | 0.01049 | Fam221a       |
| NM_028666    | 1.47 | 0.00005 | 0.00068 | Fam110a       |
| NM_009764    | 1.47 | 0.00005 | 0.00068 | Brcal         |
| NM_001039556 | 1.47 | 0.00005 | 0.00068 | Rad54b        |
| NM_016925    | 1.47 | 0.00005 | 0.00068 | Fanca         |
| NM_026410    | 1.46 | 0.00005 | 0.00068 | Cdca5         |
| NM_011369    | 1.46 | 0.00005 | 0.00068 | Shcgp1        |
| NM_001127259 | 1.45 | 0.00005 | 0.00068 | Trp63         |
| NM_028959    | 1.45 | 0.00040 | 0.00450 | Cep72         |
| NM_023284    | 1.45 | 0.00005 | 0.00068 | Nuf2          |
| NM_183046    | 1.45 | 0.00005 | 0.00068 | Kif20b        |
| NM_172453    | 1.44 | 0.00005 | 0.00068 | Pif1          |
| NM_021790    | 1.44 | 0.00600 | 0.04616 | Cenpk         |
| NM_134072    | 1.44 | 0.00005 | 0.00068 | Akr1c14       |
| NM_001253808 | 1.44 | 0.00005 | 0.00068 | Racgap1       |
| NM_028481    | 1.43 | 0.00005 | 0.00068 | Ccdc18        |
| NM_001163359 | 1.43 | 0.00005 | 0.00068 | Figl1         |
| NM_027354    | 1.43 | 0.00005 | 0.00068 | Poc1a         |
| NM_001024474 | 1.42 | 0.00020 | 0.00239 | Diras2        |
| NM_007993    | 1.42 | 0.00005 | 0.00068 | Fbn1          |
| NM_181815    | 1.42 | 0.00005 | 0.00068 | Cep128        |
| NM_026515    | 1.41 | 0.00010 | 0.00129 | 2810417H13Rik |
| NM_018779    | 1.41 | 0.00005 | 0.00068 | Pde3a         |
| NM_028232    | 1.41 | 0.00005 | 0.00068 | Sgol1         |
| NM_144818    | 1.41 | 0.00005 | 0.00068 | Ncaph         |
| NM_001033244 | 1.40 | 0.00005 | 0.00068 | Fancd2        |
| NM_001033455 | 1.40 | 0.00075 | 0.00777 | Ccdc27        |
| NM_024184    | 1.40 | 0.00005 | 0.00068 | Asf1b         |
| NM_016692    | 1.40 | 0.00005 | 0.00068 | Incenp        |
| NM_010637    | 1.38 | 0.00005 | 0.00068 | Klf4          |
| NM_146235    | 1.38 | 0.00005 | 0.00068 | Ercc61        |
| NM_001177625 | 1.38 | 0.00005 | 0.00068 | Ect2          |
| NM_134000    | 1.37 | 0.00225 | 0.02018 | Traf3ip2      |
| NM_008652    | 1.36 | 0.00005 | 0.00068 | Mybl2         |
| NM_008276    | 1.36 | 0.00005 | 0.00068 | Hoxd8         |
| NM_183089    | 1.36 | 0.00005 | 0.00068 | Dscc1         |
| NM_019444    | 1.36 | 0.00005 | 0.00068 | Ramp2         |
| NM_030172    | 1.36 | 0.00075 | 0.00777 | Efcab11       |
| NM_009320    | 1.36 | 0.00005 | 0.00068 | Slc6a6        |
| NM_080467    | 1.35 | 0.00005 | 0.00068 | Atp6v0a4      |
| NM_175265    | 1.35 | 0.00005 | 0.00068 | Bora          |
| NM_011132    | 1.35 | 0.00005 | 0.00068 | Pole          |

|              |      |         |         |               |
|--------------|------|---------|---------|---------------|
| NM_026613    | 1.35 | 0.00005 | 0.00068 | Ccdc34        |
| NM_027930    | 1.34 | 0.00005 | 0.00068 | Mtfr2         |
| NM_028390    | 1.34 | 0.00005 | 0.00068 | Anln          |
| NM_013571    | 1.34 | 0.00005 | 0.00068 | Ksr1          |
| NM_016917    | 1.33 | 0.00005 | 0.00068 | Slc40a1       |
| NM_181416    | 1.33 | 0.00005 | 0.00068 | Arhgap11a     |
| NM_001159369 | 1.33 | 0.00005 | 0.00068 | Polq          |
| NM_009802    | 1.32 | 0.00060 | 0.00636 | Car6          |
| NM_172578    | 1.32 | 0.00005 | 0.00068 | Mis18bp1      |
| NM_023058    | 1.31 | 0.00005 | 0.00068 | Pkmyt1        |
| NM_172145    | 1.31 | 0.00005 | 0.00068 | Eva1b         |
| NM_001163763 | 1.31 | 0.00005 | 0.00068 | Tcf19         |
| NM_001252055 | 1.31 | 0.00005 | 0.00068 | Ly6c1         |
| NM_001004140 | 1.31 | 0.00005 | 0.00068 | Ckap2         |
| NM_001025779 | 1.31 | 0.00005 | 0.00068 | Cdc6          |
| NM_001145827 | 1.31 | 0.00005 | 0.00068 | Stk40         |
| NM_001166406 | 1.31 | 0.00005 | 0.00068 | Kif20a        |
| NM_172616    | 1.31 | 0.00005 | 0.00068 | C330027C09Rik |
| NM_001111078 | 1.30 | 0.00005 | 0.00068 | Uhrf1         |
| NM_007634    | 1.30 | 0.00005 | 0.00068 | Ccnf          |
| NM_080850    | 1.29 | 0.00010 | 0.00129 | Pask          |
| NM_008209    | 1.29 | 0.00005 | 0.00068 | Mr1           |
| NM_001040631 | 1.29 | 0.00005 | 0.00068 | Clqtnf5       |
| NM_001278115 | 1.29 | 0.00010 | 0.00129 | Ube2t         |
| NM_025566    | 1.29 | 0.00025 | 0.00294 | Tnfaip811     |
| NM_001167730 | 1.28 | 0.00005 | 0.00068 | Rad18         |
| NM_001146081 | 1.28 | 0.00005 | 0.00068 | Fancb         |
| NM_001177867 | 1.27 | 0.00005 | 0.00068 | Sgol2         |
| NM_008737    | 1.27 | 0.00005 | 0.00068 | Nrp1          |
| NM_177331    | 1.27 | 0.00005 | 0.00068 | Gen1          |
| NM_145409    | 1.26 | 0.00005 | 0.00068 | Chtf18        |
| NM_001037865 | 1.26 | 0.00005 | 0.00068 | Col28a1       |
| NM_001039150 | 1.26 | 0.00005 | 0.00068 | Cd44          |
| NM_009061    | 1.26 | 0.00005 | 0.00068 | Rgs2          |
| NM_027263    | 1.26 | 0.00095 | 0.00960 | Apitd1        |
| NM_001111075 | 1.25 | 0.00005 | 0.00068 | Cdc25b        |
| NR_033388    | 1.25 | 0.00005 | 0.00068 | Gm3002        |
| NM_001039543 | 1.25 | 0.00005 | 0.00068 | Mlf1          |
| NM_019641    | 1.24 | 0.00005 | 0.00068 | Stmn1         |
| NM_001081238 | 1.24 | 0.00185 | 0.01705 | Palb2         |
| NM_178683    | 1.24 | 0.00010 | 0.00129 | Depdc1b       |
| NM_008017    | 1.23 | 0.00005 | 0.00068 | Smc2          |
| NM_007525    | 1.23 | 0.00005 | 0.00068 | Bard1         |
| NM_026743    | 1.23 | 0.00005 | 0.00068 | Tspan11       |
| NM_025676    | 1.23 | 0.00005 | 0.00068 | Mcm8          |
| NM_013807    | 1.23 | 0.00005 | 0.00068 | Plk3          |
| NM_025928    | 1.23 | 0.00005 | 0.00068 | Pmf1          |
| NM_001081125 | 1.23 | 0.00005 | 0.00068 | Gli2          |
| NM_001131054 | 1.22 | 0.00005 | 0.00068 | Pttgl         |
| NM_001083188 | 1.22 | 0.00005 | 0.00068 | Lig1          |
| NM_001037134 | 1.22 | 0.00060 | 0.00636 | Ccne2         |
| NM_027435    | 1.22 | 0.00005 | 0.00068 | Atad2         |
| NM_011234    | 1.22 | 0.00005 | 0.00068 | Rad51         |
| NM_001163476 | 1.22 | 0.00005 | 0.00068 | Gins1         |
| NM_172598    | 1.21 | 0.00005 | 0.00068 | Wdhd1         |
| NM_013822    | 1.21 | 0.00005 | 0.00068 | Jag1          |
| NM_153544    | 1.21 | 0.00010 | 0.00129 | BC030867      |
| NM_011634    | 1.21 | 0.00005 | 0.00068 | Traip         |
| NM_012012    | 1.21 | 0.00005 | 0.00068 | Exo1          |
| NM_010657    | 1.21 | 0.00005 | 0.00068 | Hivep3        |
| NM_001113350 | 1.20 | 0.00050 | 0.00543 | Xkr5          |



|              |      |         |         |               |
|--------------|------|---------|---------|---------------|
| NM_007472    | 1.20 | 0.00005 | 0.00068 | Aqp1          |
| NM_025415    | 1.20 | 0.00005 | 0.00068 | Cks2          |
| NM_001159646 | 1.20 | 0.00005 | 0.00068 | Dut           |
| NM_001271768 | 1.20 | 0.00005 | 0.00068 | Bhlhe41       |
| NM_019499    | 1.20 | 0.00005 | 0.00068 | Mad211        |
| NM_011427    | 1.20 | 0.00005 | 0.00068 | Snail         |
| NM_008566    | 1.19 | 0.00005 | 0.00068 | Mcm5          |
| NM_001113211 | 1.19 | 0.00005 | 0.00068 | Tmem194       |
| NM_020265    | 1.19 | 0.00005 | 0.00068 | Dkk2          |
| NM_009104    | 1.19 | 0.00005 | 0.00068 | Rrm2          |
| NM_008921    | 1.18 | 0.00005 | 0.00068 | Prim1         |
| NM_001159930 | 1.18 | 0.00005 | 0.00068 | Cenpl         |
| NM_177819    | 1.18 | 0.00005 | 0.00068 | Fam135b       |
| NM_008252    | 1.18 | 0.00005 | 0.00068 | Hmgb2         |
| NM_008871    | 1.18 | 0.00005 | 0.00068 | Serpine1      |
| NM_001042527 | 1.18 | 0.00005 | 0.00068 | Blm           |
| NM_145946    | 1.18 | 0.00070 | 0.00730 | Fanci         |
| NM_027225    | 1.17 | 0.00005 | 0.00068 | Cobll1        |
| NM_178309    | 1.16 | 0.00005 | 0.00068 | Brip1         |
| NM_080553    | 1.16 | 0.00005 | 0.00068 | Itpr3         |
| NM_029766    | 1.16 | 0.00005 | 0.00068 | Dt1           |
| NM_177372    | 1.16 | 0.00020 | 0.00239 | Dna2          |
| NM_013555    | 1.16 | 0.00005 | 0.00068 | Hoxd9         |
| NM_001159748 | 1.16 | 0.00005 | 0.00068 | Serpinc8      |
| NM_001080995 | 1.16 | 0.00005 | 0.00068 | 4632434I11Rik |
| NM_028006    | 1.15 | 0.00005 | 0.00068 | Tubel         |
| NM_033270    | 1.15 | 0.00420 | 0.03436 | E2f6          |
| NM_001081445 | 1.14 | 0.00005 | 0.00068 | Ncam1         |
| NM_025642    | 1.14 | 0.00005 | 0.00068 | Misl8a        |
| NM_025590    | 1.14 | 0.00005 | 0.00068 | Acot11        |
| NM_010239    | 1.14 | 0.00005 | 0.00068 | Fth1          |
| NM_010049    | 1.13 | 0.00005 | 0.00068 | Dhfr          |
| NM_009516    | 1.13 | 0.00005 | 0.00068 | Wee1          |
| NM_001136082 | 1.13 | 0.00005 | 0.00068 | Timeless      |
| NM_001276248 | 1.13 | 0.00005 | 0.00068 | Cp            |
| NM_011495    | 1.13 | 0.00005 | 0.00068 | Plk4          |
| NM_198622    | 1.13 | 0.00005 | 0.00068 | Hlfx          |
| NM_031863    | 1.13 | 0.00005 | 0.00068 | Cenpq         |
| NM_134117    | 1.13 | 0.00005 | 0.00068 | Pkdcc         |
| NM_173739    | 1.13 | 0.00005 | 0.00068 | Galnt18       |
| NM_028128    | 1.12 | 0.00005 | 0.00068 | Rfc5          |
| NM_001081364 | 1.12 | 0.00005 | 0.00068 | Arhgap21      |
| NM_013691    | 1.12 | 0.00005 | 0.00068 | Thbs3         |
| NM_010468    | 1.12 | 0.00205 | 0.01862 | Hoxd3         |
| NM_011264    | 1.11 | 0.00005 | 0.00068 | Rev31         |
| NM_029509    | 1.11 | 0.00005 | 0.00068 | Gbp8          |
| NM_001122768 | 1.11 | 0.00005 | 0.00068 | Lrrc8d        |
| NM_013733    | 1.11 | 0.00005 | 0.00068 | Chaf1a        |
| NM_025995    | 1.11 | 0.00005 | 0.00068 | Fbxo5         |
| NM_011638    | 1.10 | 0.00005 | 0.00068 | Tfrc          |
| NM_133762    | 1.10 | 0.00005 | 0.00068 | Ncapg2        |
| NM_001114386 | 1.10 | 0.00005 | 0.00068 | Nedd41        |
| NM_172505    | 1.10 | 0.00005 | 0.00068 | A730008H23Rik |
| NM_001190717 | 1.10 | 0.00005 | 0.00068 | Dbf4          |
| NM_019521    | 1.10 | 0.00005 | 0.00068 | Gas6          |
| NR_030682    | 1.09 | 0.00005 | 0.00068 | 2810410L24Rik |
| NM_201364    | 1.09 | 0.00005 | 0.00068 | BC055324      |
| NM_021288    | 1.09 | 0.00005 | 0.00068 | Tyms          |
| NM_146186    | 1.09 | 0.00005 | 0.00068 | Wdr62         |
| NR_033225    | 1.08 | 0.00005 | 0.00068 | Gm13375       |
| NM_028131    | 1.08 | 0.00010 | 0.00129 | Cenpn         |

|              |       |         |         |               |
|--------------|-------|---------|---------|---------------|
| NM_028083    | 1.08  | 0.00005 | 0.00068 | Chaf1b        |
| NM_133687    | 1.08  | 0.00005 | 0.00068 | Cxxc5         |
| NM_001163356 | 1.08  | 0.00125 | 0.01222 | Fam212b       |
| NM_001029856 | 1.07  | 0.00005 | 0.00068 | Atad5         |
| NM_027871    | 1.07  | 0.00005 | 0.00068 | Arhgef3       |
| NM_007659    | 1.07  | 0.00005 | 0.00068 | Cdk1          |
| NM_001032413 | 1.07  | 0.00005 | 0.00068 | Pear1         |
| NM_146061    | 1.06  | 0.00005 | 0.00068 | Prr5          |
| NM_001164433 | 1.06  | 0.00005 | 0.00068 | Mical1        |
| NM_001085376 | 1.06  | 0.00005 | 0.00068 | Pappa2        |
| NM_001166629 | 1.05  | 0.00160 | 0.01505 | Dynl1a        |
| NM_008458    | 1.05  | 0.00345 | 0.02925 | Serpina3c     |
| NM_001038642 | 1.05  | 0.00005 | 0.00068 | Ets1          |
| NM_001285945 | 1.05  | 0.00005 | 0.00068 | Zranb3        |
| NM_146116    | 1.05  | 0.00005 | 0.00068 | Tubb4b        |
| NM_001163480 | 1.05  | 0.00005 | 0.00068 | Neurl1a       |
| NM_016861    | 1.04  | 0.00005 | 0.00068 | Pdlim1        |
| NM_001081091 | 1.04  | 0.00005 | 0.00068 | Cep152        |
| NM_010220    | 1.04  | 0.00005 | 0.00068 | Fkbp5         |
| NM_013529    | 1.04  | 0.00005 | 0.00068 | Gfpt2         |
| NM_020567    | 1.04  | 0.00005 | 0.00068 | Gmn           |
| NM_001242396 | 1.04  | 0.00005 | 0.00068 | Jmjd1c        |
| NM_010791    | 1.03  | 0.00045 | 0.00496 | Meox1         |
| NM_019670    | 1.03  | 0.00005 | 0.00068 | Diap3         |
| NM_001136071 | 1.03  | 0.00005 | 0.00068 | Lsp1          |
| NM_029482    | 1.03  | 0.00005 | 0.00068 | 4930579G24Rik |
| NM_001025365 | 1.02  | 0.00005 | 0.00068 | Miip          |
| NM_012018    | 1.02  | 0.00005 | 0.00068 | Cep110        |
| NM_008563    | 1.02  | 0.00005 | 0.00068 | Mcm3          |
| NM_010353    | 1.01  | 0.00005 | 0.00068 | Gsg2          |
| NM_009542    | 1.01  | 0.00005 | 0.00068 | Zfp101        |
| NM_178252    | 1.01  | 0.00005 | 0.00068 | Arhgap33      |
| NM_178856    | 1.01  | 0.00070 | 0.00730 | Gins2         |
| NM_027948    | 1.01  | 0.00135 | 0.01303 | 1700003E16Rik |
| NM_001145968 | -1.01 | 0.00265 | 0.02329 | Rwdd2a        |
| NM_001159394 | -1.01 | 0.00005 | 0.00068 | Nfkbiz        |
| NM_001198894 | -1.01 | 0.00520 | 0.04107 | Gpr56         |
| NM_013599    | -1.01 | 0.00005 | 0.00068 | Mmp9          |
| NM_009834    | -1.02 | 0.00005 | 0.00068 | Ccrn41        |
| NM_177906    | -1.02 | 0.00005 | 0.00068 | Opcml         |
| NM_013468    | -1.02 | 0.00005 | 0.00068 | Ankrd1        |
| NM_001284507 | -1.03 | 0.00005 | 0.00068 | Crabp1        |
| NM_001025577 | -1.03 | 0.00005 | 0.00068 | Maf           |
| NM_153529    | -1.05 | 0.00005 | 0.00068 | Nrn1          |
| NM_054056    | -1.05 | 0.00005 | 0.00068 | Pawr          |
| NM_025685    | -1.05 | 0.00005 | 0.00068 | Col27a1       |
| NM_010132    | -1.05 | 0.00005 | 0.00068 | Emx2          |
| NM_001135100 | -1.06 | 0.00035 | 0.00397 | I134          |
| NM_177068    | -1.06 | 0.00005 | 0.00068 | Olfml2b       |
| NM_172856    | -1.06 | 0.00005 | 0.00068 | Cers6         |
| NM_001177810 | -1.06 | 0.00005 | 0.00068 | Rapgef3       |
| NM_016919    | -1.07 | 0.00005 | 0.00068 | Col5a3        |
| NM_009675    | -1.07 | 0.00005 | 0.00068 | Aoc3          |
| NM_007950    | -1.07 | 0.00015 | 0.00185 | Ereg          |
| NM_001271531 | -1.07 | 0.00005 | 0.00068 | Insig2        |
| NM_027950    | -1.08 | 0.00005 | 0.00068 | Osgin1        |
| NM_001104550 | -1.08 | 0.00005 | 0.00068 | Vmn2r98       |
| NM_026821    | -1.08 | 0.00005 | 0.00068 | Lurap11       |
| NM_008046    | -1.09 | 0.00005 | 0.00068 | Fst           |
| NM_009154    | -1.10 | 0.00005 | 0.00068 | Sema5a        |
| NM_001039239 | -1.10 | 0.00005 | 0.00068 | Zfp808        |

|              |       |         |         |               |
|--------------|-------|---------|---------|---------------|
| NM_001109758 | -1.11 | 0.00445 | 0.03612 | Bcan          |
| NM_001252578 | -1.11 | 0.00005 | 0.00068 | Sulf2         |
| NM_001164316 | -1.12 | 0.00005 | 0.00068 | Ccser1        |
| NM_023617    | -1.12 | 0.00005 | 0.00068 | Aox3          |
| NM_172815    | -1.13 | 0.00005 | 0.00068 | Rspo2         |
| NM_010924    | -1.13 | 0.00005 | 0.00068 | Nnmt          |
| NM_001040085 | -1.13 | 0.00005 | 0.00068 | Syt12         |
| NM_012030    | -1.13 | 0.00005 | 0.00068 | Slc9a3r1      |
| NM_013834    | -1.14 | 0.00005 | 0.00068 | Sfrp1         |
| NM_008630    | -1.14 | 0.00005 | 0.00068 | Mt2           |
| NM_026189    | -1.16 | 0.00005 | 0.00068 | Eepd1         |
| NM_145144    | -1.16 | 0.00005 | 0.00068 | Aif11         |
| NM_021381    | -1.17 | 0.00005 | 0.00068 | Prokr1        |
| NM_008349    | -1.18 | 0.00005 | 0.00068 | I110rb        |
| NM_133764    | -1.18 | 0.00005 | 0.00068 | Atp6v0e2      |
| NM_001042779 | -1.18 | 0.00005 | 0.00068 | Sema3b        |
| NM_172648    | -1.19 | 0.00035 | 0.00397 | Ifi205        |
| NM_023844    | -1.19 | 0.00005 | 0.00068 | Jam2          |
| NM_001172481 | -1.19 | 0.00005 | 0.00068 | Aspn          |
| NR_015602    | -1.20 | 0.00005 | 0.00068 | F730043M19Rik |
| NM_001079844 | -1.20 | 0.00005 | 0.00068 | Gpc6          |
| NM_008872    | -1.20 | 0.00005 | 0.00068 | Plat          |
| NM_011581    | -1.21 | 0.00005 | 0.00068 | Thbs2         |
| NM_133955    | -1.21 | 0.00005 | 0.00068 | Rhou          |
| NM_054041    | -1.22 | 0.00005 | 0.00068 | Antxr1        |
| NM_001271483 | -1.22 | 0.00005 | 0.00068 | Clip4         |
| NM_011610    | -1.22 | 0.00005 | 0.00068 | Tnfrsf1b      |
| NM_028426    | -1.22 | 0.00255 | 0.02254 | 3110007F17Rik |
| NM_008057    | -1.22 | 0.00005 | 0.00068 | Fzd7          |
| NM_008973    | -1.24 | 0.00005 | 0.00068 | Ptn           |
| NM_176922    | -1.24 | 0.00005 | 0.00068 | Itgal1        |
| NM_023386    | -1.24 | 0.00550 | 0.04308 | Rtp4          |
| NM_001081977 | -1.25 | 0.00005 | 0.00068 | Rnf144a       |
| NM_010151    | -1.26 | 0.00005 | 0.00068 | Nr2f1         |
| NM_008321    | -1.26 | 0.00005 | 0.00068 | Id3           |
| NM_178591    | -1.26 | 0.00005 | 0.00068 | Nrg1          |
| NM_001242423 | -1.27 | 0.00005 | 0.00068 | Fam105a       |
| NM_031166    | -1.27 | 0.00445 | 0.03612 | Id4           |
| NM_013654    | -1.27 | 0.00005 | 0.00068 | Ccl7          |
| NM_001204129 | -1.27 | 0.00005 | 0.00068 | Clqtnf1       |
| NR_045079    | -1.27 | 0.00015 | 0.00185 | 3300005D01Rik |
| NM_010750    | -1.27 | 0.00005 | 0.00068 | Mab2111       |
| NM_010516    | -1.28 | 0.00005 | 0.00068 | Cyr61         |
| NM_001081433 | -1.28 | 0.00005 | 0.00068 | Ankrd44       |
| NM_198656    | -1.28 | 0.00045 | 0.00496 | Cdh26         |
| NM_010234    | -1.28 | 0.00530 | 0.04167 | Fos           |
| NM_001037987 | -1.28 | 0.00005 | 0.00068 | Edil3         |
| NM_008491    | -1.29 | 0.00005 | 0.00068 | Lcn2          |
| NM_010111    | -1.29 | 0.00005 | 0.00068 | Efnb2         |
| NM_009285    | -1.30 | 0.00005 | 0.00068 | Stc1          |
| NM_011198    | -1.30 | 0.00005 | 0.00068 | Ptgs2         |
| NM_008176    | -1.30 | 0.00005 | 0.00068 | Cxcl1         |
| NM_001276489 | -1.30 | 0.00005 | 0.00068 | Ism1          |
| NM_016873    | -1.31 | 0.00005 | 0.00068 | Wisp2         |
| NM_173008    | -1.31 | 0.00005 | 0.00068 | Ssc5d         |
| NM_011839    | -1.32 | 0.00430 | 0.03502 | Mab2112       |
| NM_008695    | -1.35 | 0.00005 | 0.00068 | Nid2          |
| NM_013495    | -1.36 | 0.00005 | 0.00068 | Cpt1a         |
| NM_001039048 | -1.36 | 0.00250 | 0.02214 | Trim63        |
| NM_001081307 | -1.37 | 0.00005 | 0.00068 | Ppp1r12b      |
| NM_023455    | -1.37 | 0.00005 | 0.00068 | Nat8          |

|              |       |         |         |               |
|--------------|-------|---------|---------|---------------|
| NR_026733    | -1.38 | 0.00005 | 0.00068 | 3110039M20Rik |
| NM_199223    | -1.39 | 0.00005 | 0.00068 | Rtn4r12       |
| NM_182808    | -1.40 | 0.00015 | 0.00185 | Fam19a1       |
| NM_001190911 | -1.40 | 0.00015 | 0.00185 | Kirrel3       |
| NM_009144    | -1.40 | 0.00005 | 0.00068 | Sfrp2         |
| NM_007400    | -1.41 | 0.00005 | 0.00068 | Adam12        |
| NM_007901    | -1.42 | 0.00005 | 0.00068 | Slpr1         |
| NM_018781    | -1.43 | 0.00005 | 0.00068 | Egr3          |
| NR_045098    | -1.43 | 0.00005 | 0.00068 | Gm2115        |
| NM_011330    | -1.45 | 0.00125 | 0.01222 | Cc111         |
| NM_001103177 | -1.46 | 0.00005 | 0.00068 | Ablim1        |
| NM_009676    | -1.46 | 0.00005 | 0.00068 | Aox1          |
| NM_001042660 | -1.47 | 0.00005 | 0.00068 | Smad7         |
| NM_008750    | -1.48 | 0.00005 | 0.00068 | Nxn           |
| NM_001172424 | -1.49 | 0.00005 | 0.00068 | Dhrs3         |
| NM_001081756 | -1.49 | 0.00005 | 0.00068 | Nckap5        |
| NM_001113325 | -1.49 | 0.00005 | 0.00068 | Grial         |
| NM_139300    | -1.49 | 0.00005 | 0.00068 | Mylk          |
| NM_053106    | -1.50 | 0.00005 | 0.00068 | Lmod1         |
| NM_001195084 | -1.51 | 0.00005 | 0.00068 | Plscr2        |
| NM_011526    | -1.51 | 0.00055 | 0.00590 | Tagln         |
| NM_001081127 | -1.54 | 0.00005 | 0.00068 | Adamts14      |
| NM_025427    | -1.54 | 0.00005 | 0.00068 | Rgcc          |
| NR_036452    | -1.54 | 0.00045 | 0.00496 | E230016K23Rik |
| NM_009721    | -1.55 | 0.00005 | 0.00068 | Atp1b1        |
| NM_011921    | -1.56 | 0.00055 | 0.00590 | Aldh1a7       |
| NM_011315    | -1.56 | 0.00005 | 0.00068 | Saa3          |
| NM_011352    | -1.58 | 0.00015 | 0.00185 | Sema7a        |
| NM_026436    | -1.59 | 0.00005 | 0.00068 | Tmem86a       |
| NM_019564    | -1.59 | 0.00405 | 0.03361 | Htral         |
| NM_008086    | -1.59 | 0.00005 | 0.00068 | Gas1          |
| NM_008404    | -1.62 | 0.00005 | 0.00068 | Itgb2         |
| NM_001038839 | -1.62 | 0.00005 | 0.00068 | P2rx7         |
| NM_023048    | -1.63 | 0.00005 | 0.00068 | Asb4          |
| NM_027828    | -1.64 | 0.00005 | 0.00068 | Fam110c       |
| NM_007413    | -1.67 | 0.00005 | 0.00068 | Adora2b       |
| NM_009062    | -1.68 | 0.00005 | 0.00068 | Rgs4          |
| NM_007562    | -1.69 | 0.00005 | 0.00068 | Bnc1          |
| NM_029600    | -1.69 | 0.00005 | 0.00068 | Abcc3         |
| NM_007498    | -1.70 | 0.00005 | 0.00068 | Atf3          |
| NM_013467    | -1.71 | 0.00005 | 0.00068 | Aldh1a1       |
| NM_009899    | -1.72 | 0.00005 | 0.00068 | Clca1         |
| NM_009141    | -1.73 | 0.00005 | 0.00068 | Cxcl5         |
| NM_001025602 | -1.76 | 0.00005 | 0.00068 | Il1r11        |
| NM_013743    | -1.77 | 0.00005 | 0.00068 | Pdk4          |
| NM_011580    | -1.79 | 0.00005 | 0.00068 | Thbs1         |
| NM_011118    | -1.81 | 0.00005 | 0.00068 | Pr12c3        |
| NM_010104    | -1.85 | 0.00215 | 0.01944 | Edn1          |
| NM_016689    | -1.86 | 0.00035 | 0.00397 | Aqp3          |
| NM_026416    | -1.87 | 0.00005 | 0.00068 | S100a16       |
| NM_176933    | -1.87 | 0.00005 | 0.00068 | Dusp4         |
| NM_011333    | -1.89 | 0.00005 | 0.00068 | Ccl2          |
| NM_172799    | -1.93 | 0.00020 | 0.00239 | Tt116         |
| NM_172393    | -2.00 | 0.00005 | 0.00068 | Aim1          |
| NM_001029836 | -2.03 | 0.00005 | 0.00068 | Npnt          |
| NM_010228    | -2.16 | 0.00005 | 0.00068 | Flt1          |
| NM_178738    | -2.18 | 0.00005 | 0.00068 | Prss35        |
| NM_019759    | -2.19 | 0.00005 | 0.00068 | Dpt           |
| NM_001112813 | -2.27 | 0.00005 | 0.00068 | Cacnalg       |
| NM_011338    | -2.32 | 0.00005 | 0.00068 | Ccl9          |
| NM_080639    | -2.51 | 0.00005 | 0.00068 | Timp4         |

|              |       |         |         |               |
|--------------|-------|---------|---------|---------------|
| NM_030728    | -2.51 | 0.00005 | 0.00068 | 9930013L23Rik |
| NM_008760    | -2.53 | 0.00005 | 0.00068 | Ogn           |
| NM_023608    | -2.62 | 0.00005 | 0.00068 | Gdpd2         |
| NM_020581    | -2.77 | 0.00005 | 0.00068 | Angptl4       |
| NM_001042615 | -2.78 | 0.00005 | 0.00068 | Htra3         |
| NM_153170    | -2.82 | 0.00005 | 0.00068 | Slc36a2       |

### Supplement Table 3 Hh-signaling differentially responsive genes

Hh-CM vs Esrrb+Hh-CM is statistically different ( $q < 0.05$ )

| Gene bank accession number | Gene Symbol   | Control | Hh-CM   | Esrrb   | Esrrb+Hh-CM |
|----------------------------|---------------|---------|---------|---------|-------------|
| NM_011315                  | Saa3          | 1382.76 | 363.421 | 2632.83 | 893.386     |
| NM_011118                  | Pr12c3        | 379.645 | 105.745 | 687.672 | 195.874     |
| NM_008276                  | Hoxd8         | 32.2431 | 71.9886 | 58.1307 | 149.524     |
| NM_001044751               | Hsd11b1       | 3.95612 | 83.2878 | 2.62633 | 156.776     |
| NM_146116                  | Tubb4b        | 58.1223 | 89.1899 | 77.0267 | 159.169     |
| NM_010517                  | Igfbp4        | 24.0561 | 81.7083 | 18.6476 | 142.621     |
| NM_011623                  | Top2a         | 14.9871 | 44.2786 | 21.7656 | 99.5117     |
| NM_001284507               | Crabp1        | 137.413 | 62.1162 | 232.543 | 113.994     |
| NM_017370                  | Hp            | 41.4648 | 62.5567 | 40.3169 | 113.038     |
| NM_054098                  | Steap4        | 15.4279 | 35.4933 | 41.8127 | 80.6706     |
| NM_019641                  | Stmn1         | 35.9876 | 72.0775 | 49.3099 | 116.755     |
| NM_026785                  | Ube2c         | 23.4463 | 44.0101 | 26.7943 | 80.2832     |
| NM_025415                  | Cks2          | 24.4244 | 38.3814 | 31.4891 | 72.5601     |
| NM_009144                  | Sfrp2         | 8.47181 | 4.06885 | 90.6511 | 34.2415     |
| NM_008966                  | Ptgfr         | 32.7896 | 51.1092 | 50.7009 | 80.1903     |
| NM_001012273               | Birc5         | 13.4229 | 29.1083 | 19.4776 | 56.0274     |
| NM_009828                  | Ccna2         | 14.5706 | 28.8957 | 18.4045 | 55.2587     |
| NM_001271729               | Tk1           | 10.2435 | 21.0511 | 13.717  | 42.6667     |
| NM_023223                  | Cdc20         | 11.3334 | 21.2123 | 13.1781 | 41.9055     |
| NM_001253808               | Racgap1       | 18.1094 | 30.693  | 18.9131 | 51.1653     |
| NM_007681                  | Cenpa         | 14.0848 | 32.3276 | 17.9992 | 52.6722     |
| NM_001285997               | Prc1          | 11.4492 | 22.4382 | 14.0397 | 42.5162     |
| NM_134117                  | Pkdcc         | 10.5465 | 25.0133 | 20.4125 | 44.5321     |
| NM_028870                  | Cltb          | 13.2807 | 33.0279 | 17.6575 | 51.709      |
| NM_001131054               | Pttg1         | 10.9923 | 18.7735 | 15.9545 | 37.292      |
| NM_019759                  | Dpt           | 77.4622 | 17.0169 | 160.435 | 35.2561     |
| NM_013555                  | Hoxd9         | 7.70152 | 12.4773 | 13.7086 | 30.6003     |
| NM_172301                  | Ccnb1         | 8.65499 | 16.2048 | 10.1651 | 33.7935     |
| NM_001163763               | Tcf19         | 14.2568 | 27.1727 | 17.8747 | 44.3905     |
| NM_008695                  | Nid2          | 54.4263 | 22.1403 | 96.212  | 37.7018     |
| NM_172505                  | A730008H23Rik | 17.6613 | 27.1762 | 19.5963 | 42.0504     |
| NM_021342                  | Kcne4         | 7.3513  | 11.5393 | 14.1286 | 25.4446     |
| NM_013538                  | Cdca3         | 6.2023  | 16.2903 | 8.85753 | 29.8962     |
| NM_001199123               | Spc25         | 8.4548  | 17.7626 | 10.6615 | 31.3485     |
| NM_001177752               | Pfkfb3        | 1.44702 | 7.45226 | 5.21433 | 20.8522     |
| NM_009104                  | Rrm2          | 12.2636 | 21.6037 | 15.3878 | 34.998      |
| NM_019499                  | Mad211        | 15.2553 | 25.573  | 16.9016 | 38.7528     |
| NM_011496                  | Aurkb         | 6.61205 | 12.6954 | 8.1655  | 25.6183     |
| NM_026560                  | Cdca8         | 8.33981 | 16.9662 | 8.72491 | 29.5316     |
| NM_001040435               | Tacc3         | 9.93829 | 18.3717 | 10.6727 | 30.8518     |
| NM_001141975               | Tpx2          | 6.82774 | 13.5202 | 8.44815 | 25.8247     |
| NR_033780                  | 2810001G20Rik | 8.04778 | 12.8002 | 12.3589 | 24.5246     |
| NM_016692                  | Incenp        | 8.33651 | 13.7915 | 9.57497 | 25.2039     |
| NM_134471                  | Kif2c         | 5.19041 | 10.0141 | 6.30609 | 21.3537     |
| NM_144526                  | Fam64a        | 6.40796 | 12.9486 | 8.15955 | 24.2332     |
| NM_009773                  | Bub1b         | 5.64362 | 9.99851 | 7.35944 | 21.2628     |
| NM_008566                  | Mcm5          | 10.1526 | 15.4165 | 11.6413 | 26.6487     |
| NM_023284                  | Nuf2          | 6.97773 | 14.2675 | 9.20804 | 25.1471     |
| NM_023209                  | Pbk           | 7.50398 | 14.5895 | 8.39717 | 25.369      |
| NM_146171                  | Ncapd2        | 6.43767 | 12.8183 | 7.631   | 23.1609     |
| NM_029975                  | Ulbp1         | 6.59652 | 10.024  | 10.2266 | 19.743      |
| NM_011121                  | Plk1          | 3.91676 | 8.0847  | 5.04405 | 17.6332     |
| NM_008021                  | Foxm1         | 5.15874 | 11.0047 | 6.66217 | 20.391      |

|                                                              |             |          |          |           |             |
|--------------------------------------------------------------|-------------|----------|----------|-----------|-------------|
| NM_010615                                                    | Kif11       | 4.9772   | 10.4217  | 6.65913   | 19.6478     |
| NM_028390                                                    | Anln        | 7.40574  | 12.0352  | 8.34586   | 21.1809     |
| NM_181589                                                    | Ckap21      | 4.85332  | 11.304   | 6.69815   | 20.3672     |
| NM_144818                                                    | Ncaph       | 4.88254  | 9.45474  | 6.97036   | 18.5085     |
| NM_011497                                                    | Aurka       | 4.72147  | 8.57015  | 5.717     | 17.5218     |
| NM_024184                                                    | Asf1b       | 4.02044  | 7.60624  | 6.24004   | 16.4537     |
| NM_001083188                                                 | Lig1        | 10.0937  | 15.6708  | 10.2945   | 24.0361     |
| NM_011369                                                    | Shcbp1      | 5.14585  | 10.0263  | 6.67605   | 18.3185     |
| NM_145588                                                    | Kif22       | 4.27706  | 7.16282  | 5.47062   | 15.3129     |
| NM_001004140                                                 | Ckap2       | 7.93221  | 13.2466  | 8.57911   | 21.2596     |
| NM_001190717                                                 | Dbf4        | 8.24379  | 14.1411  | 10.3237   | 22.099      |
| NM_001167743                                                 | Slfn8       | 4.43952  | 7.64206  | 7.99226   | 15.4586     |
| NM_027435                                                    | Atad2       | 7.22101  | 12.711   | 8.75452   | 20.4121     |
| NM_001081117                                                 | Mki67       | 2.62498  | 7.13259  | 3.60112   | 14.3121     |
| NM_026412                                                    | Knstrn      | 4.18197  | 8.54224  | 5.45924   | 15.5637     |
| NM_025995                                                    | Fbxo5       | 6.12983  | 10.938   | 8.27816   | 17.8267     |
| NM_024245                                                    | Kif23       | 4.29708  | 7.90053  | 4.88319   | 14.7708     |
| NM_026778                                                    | Cthrc1      | 3.61061  | 11.9165  | 6.56327   | 18.7002     |
| NM_028128                                                    | Rfc5        | 7.41636  | 11.2861  | 8.27539   | 17.9988     |
| NM_172563                                                    | Hlf         | 2.47716  | 5.2413   | 6.63521   | 11.8926     |
| NM_011495                                                    | Plk4        | 6.17554  | 9.57894  | 7.3879    | 16.1505     |
| NM_023294                                                    | Ndc80       | 5.39062  | 11.6882  | 6.39909   | 18.1685     |
| NM_013552                                                    | Hmmr        | 3.82564  | 9.10929  | 4.98689   | 15.4978     |
| NM_019670                                                    | Diap3       | 4.64476  | 7.98869  | 7.02255   | 14.3548     |
| NM_029766                                                    | Dtl         | 5.69484  | 10.195   | 7.36267   | 16.4838     |
| NM_027975                                                    | Fam83d      | 3.15462  | 8.13212  | 4.4174    | 14.1758     |
| NM_001113179                                                 | Bub1        | 3.00824  | 6.12662  | 3.76441   | 11.9502     |
| NM_001122768                                                 | Lrrc8d      | 1.80273  | 3.2924   | 4.21507   | 9.09625     |
| NM_008017                                                    | Smc2        | 5.17318  | 9.02486  | 6.29461   | 14.797      |
| NM_017407                                                    | Spag5       | 3.4597   | 6.17541  | 3.78081   | 11.8739     |
| NM_146208                                                    | Neil3       | 1.88813  | 5.11904  | 2.59228   | 10.709      |
| NM_019438                                                    | Ncapg       | 4.74681  | 8.65429  | 5.07499   | 14.2257     |
| NM_016808                                                    | Usp2        | 1.0894   | 7.54002  | 1.56406   | 13.0368     |
| NM_013733                                                    | Chaf1a      | 5.80523  | 9.33386  | 6.84116   | 14.7471     |
| NM_007634                                                    | Ccnf        | 4.35235  | 7.41491  | 5.19433   | 12.7692     |
| NM_001177625                                                 | Ect2        | 3.92565  | 7.87449  | 5.06206   | 13.1331     |
| NM_009013                                                    | Rad51ap1    | 3.58395  | 8.98922  | 4.17847   | 14.1513     |
| NM_001177867                                                 | Sgol2       | 3.28707  | 6.23677  | 4.69337   | 11.3567     |
| NM_001080158                                                 | Cenpm       | 3.77236  | 6.52127  | 3.99093   | 11.6394     |
| NM_001024139                                                 | Adamts15    | 0.396237 | 0.725943 | 4.52673   | 5.79864     |
| NM_198622                                                    | Hlfx        | 3.61498  | 6.12892  | 5.11338   | 11.1665     |
| NM_011234                                                    | Rad51       | 4.66081  | 7.77432  | 5.49473   | 12.7909     |
| NM_008235                                                    | Hes1        | 0.680057 | 9.04353  | 0.0588155 | 3.17691     |
| NM_001085376                                                 | Pappa2      | 7.79788  | 12.3406  | 2.57736   | 5.36725     |
| NM_016917                                                    | Slc40a1     | 6.08488  | 12.5111  | 1.5132    | 3.81684     |
| NM_007729                                                    | Coll1a1     | 7.52241  | 14.5338  | 3.08727   | 4.76399     |
| NM_019503                                                    | Fxyd1       | 11.5538  | 19.2923  | 3.9421    | 6.74855     |
| NM_007470                                                    | Apod        | 10.2707  | 35.7038  | 7.69312   | 15.2765     |
| NM_001164724                                                 | Il33        | 23.7629  | 64.9144  | 19.1804   | 28.6884     |
| NM_029568                                                    | Mfap4       | 29.8356  | 62.0873  | 11.4344   | 13.7917     |
| NM_008760                                                    | Ogn         | 165.909  | 71.6634  | 106.437   | 18.4453     |
| NM_022315                                                    | Smoc2       | 77.9563  | 119.505  | 63.281    | 63.8382     |
| Hh-CM vs Esrrb+Hh-CM is not statistically different (q>0.05) |             |          |          |           |             |
| gene                                                         | Gene Symbol | Control  | Hh-CM    | Esrrb     | Esrrb+Hh-CM |
| NM_008380                                                    | Inhba       | 2.79209  | 16.5248  | 1.28256   | 15.89       |
| NM_001168491                                                 | Pdcd4       | 64.3809  | 124.969  | 95.9834   | 123.671     |
| NM_021492                                                    | Ap3b2       | 0.644023 | 1.3765   | 1.09738   | 1.27967     |

NM\_001111274

Igf1

3.51074

9.75599

7.48334

10.2296
