# Supplementary material for: Genes targeted by the Hedgehog-signaling pathway can be regulated by Estrogen related receptor β
Source: PubMed Central journal article supplement (PMC4657266; doi:10.1186/s12867-015-0047-3), 2015-11-23
Supplement: 12867_2015_47_MOESM2_ESM.pdf [file 12867_2015_47_MOESM2_ESM.pdf]

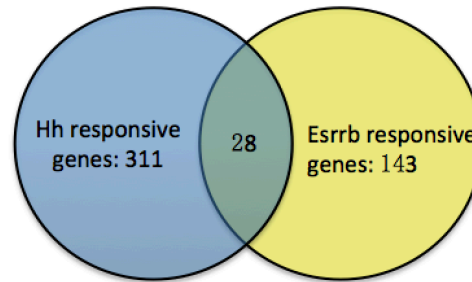

**P value=1.24e-18**

|                  | Hh increased:                                                                          | Hh decreased:                                                                                                                                                                                    |
|------------------|----------------------------------------------------------------------------------------|--------------------------------------------------------------------------------------------------------------------------------------------------------------------------------------------------|
| Esrrb increased: | Igf1 (16000)<br>Mafb (16658)<br>Steap4 (117167)<br>Pfkfb3 (170768)<br>Hlf (217082)     | Adam12 (11489)<br>Kcnj15 (16516)<br>Sfrp2 (20319)<br>Stc1 (20855)<br>Dpt (56429)<br>Abcc3 (76408)<br>Fam110c (104943)<br>Npnt (114249)<br>Prss35 (244954)<br>Slc36a2 (246049)<br>Zfp808 (630579) |
| Esrrb decreased: | Inhba (16323)<br>Slc40a1 (53945)<br>Serpinb1a (66222)<br>Mfab4 (76293)<br>Pi15 (94227) | Fabp4 (11770)<br>Phex (18675)<br>Ccl15 (20304)<br>Tagln (21345)<br>Aldh1a7 (26358)<br>Lmod1 (93689)<br>Ces1a (244595)                                                                            |

**Supplement Figure 1. Genes regulated by either Esrrb or Hh-signaling pathway**

Hh responsive genes and Esrrb responsive genes were compared, and 28 genes (enrichment p value=  $1.24 \times 10^{-18}$ ) were altered by either Hh-signaling activation or Esrrb expression. 12 genes among the 28 genes can be regulated the same way by either Hh or Esrrb (Fabp4, Phex, Ccl5, Tagln, Aldn1a7, Lmod1, Ces1a, Igf1, Mafb, Steap4, Pfkfb3, Hlf).



**Supplement Figure 2. Decision tree model of gene sorting**

For all four biological conditions (control, Hh treatment, Esrrb expression, Esrrb expression with Hh treatment), all 5 possible but non-redundant pairwise comparisons for differentially expressed gene test were carried out. An array including all the transcripts each with the test results of the pairwise comparison was generated, and transcripts are grouped by whether they passed certain test using the “yes (Y)” or “no (N)” logic decision. A total of 32 groups were generated. Genes of interest for further analysis are subjected to further data filter based on fold change value and/or RPKM value.

| Gene ID                     | Symbol | LogFC |
|-----------------------------|--------|-------|
| Transcription Factor        |        |       |
| 14283                       | Fos11  | -1.93 |
| 11910                       | Atf3   | -1.67 |
| 630579                      | Zfp808 | -1.23 |
| 13655                       | Egr3   | -1.09 |
| 12394                       | Runx1  | -1.05 |
| 71093                       | Atoh8  | 1.00  |
| 15434                       | Hoxd3  | 1.08  |
| 217082                      | Hlf    | 1.08  |
| 52679                       | E2f7   | 1.08  |
| 14235                       | Foxm1  | 1.09  |
| 55994                       | Smad9  | 1.11  |
| 108961                      | E2f8   | 1.13  |
| 15437                       | Hoxd8  | 1.16  |
| 16658                       | Mafb   | 1.19  |
| 16656                       | Hivep3 | 1.24  |
| 16600                       | Klf4   | 1.35  |
| 14633                       | Gli2   | 1.37  |
| 84653                       | Hes7   | 1.49  |
| 54139                       | Irf6   | 1.62  |
| 17301                       | Foxd2  | 1.71  |
| 22061                       | Trp63  | 1.87  |
| 207259                      | Zbtb7c | 2.26  |
| 15205                       | Hes1   | 3.73  |
| 14632                       | Gli1   | 9.14  |
| Chromatin Remodeling Factor |        |       |
| 12615                       | Cenpa  | 1.20  |
| Transcription co-factor     |        |       |
| 12173                       | Bnc1   | -1.59 |
| 107765                      | Ankrd1 | -1.19 |
| 12189                       | Brca1  | 1.05  |
| 30937                       | Lmcd1  | 1.43  |
| 71648                       | Optn   | 1.63  |

### **Supplement Figure 3. Hh-responsive transcription-related genes**

Among the Hh-responsive genes, a group of transcription-related genes are discovered, including transcription factors, chromatin remodeling factors and transcriptional co-factors.

| Gene    | Control | Shh-CM | Esrrb  | Esrrb+shh-CM | Correlation Score |
|---------|---------|--------|--------|--------------|-------------------|
| Pdcd4   | 64.4    | 125.0  | 96.0   | 123.7        | 0.969             |
| Tubb4b  | 58.1    | 89.2   | 77.0   | 159.2        | 0.940             |
| Ogn     | 165.9   | 71.7   | 106.4  | 18.4         | 0.998             |
| Dpt     | 77.5    | 17.0   | 160.4  | 35.3         | 0.994             |
| Stmn1   | 36.0    | 72.1   | 49.3   | 116.8        | 0.998             |
| Hp      | 41.5    | 62.6   | 40.3   | 113.0        | 0.981             |
| Hoxd8   | 32.2    | 72.0   | 58.1   | 149.5        | 0.996             |
| Top2a   | 15.0    | 44.3   | 21.8   | 99.5         | 0.998             |
| Igfbp4  | 24.1    | 81.7   | 18.6   | 142.6        | 0.996             |
| Igf1    | 3.5     | 9.8    | 7.5    | 10.2         | 0.896             |
| Sfrp2   | 8.5     | 4.1    | 90.7   | 34.2         | 0.999             |
| Hsd11b1 | 4.0     | 83.3   | 2.6    | 156.8        | 0.999             |
| Saa3    | 1382.8  | 363.4  | 2632.8 | 893.4        | 0.996             |
| Smoc2   | 78.0    | 119.5  | 63.3   | 63.8         | 0.978             |
| Pr12c3  | 379.6   | 105.7  | 687.7  | 195.9        | 0.997             |

**Supplement Figure 4. Correlation of qPCR and RNA-seq of top 15 Hh differentially responsive genes**

RPKM (Reads Per Kilo base per Million reads) values of qPCR-validated genes are normalized to NIH3T3-pc3.1. qPCR results from different conditions are also normalized to NIH3T3-pc3.1 condition. For each tested gene, both normalized RPKM values and normalized qPCR results are correlated by Pearson Correlation and correlation coefficients are shown.



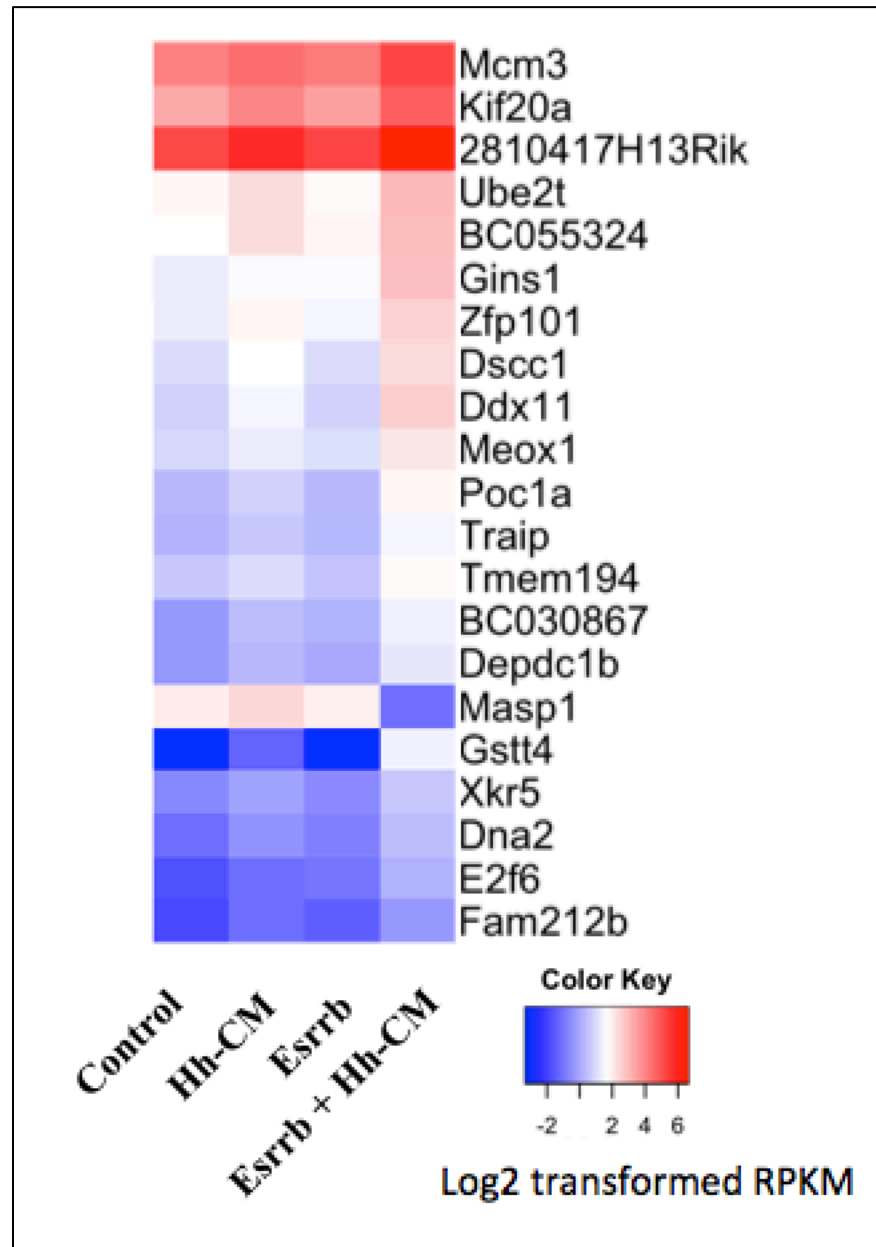

### **Supplement Figure 5. Esrrb-dependent Hh-responsive genes**

21 genes showed Hh response only when Esrrb was expressed (Control vs. Hh,  $q > 0.05$ ; Control vs. Esrrb,  $q > 0.05$ ; Control vs. Esrrb+Hh-CM,  $q < 0.05$ ,  $\log_{2}FC > 1$  or  $< -1$ ; Esrrb vs. Esrrb+Hh-CM,  $q < 0.05$ ,  $\log_{2}FC > 1$  or  $< -1$ ; Hh vs. Esrrb+Hh-CM,  $q < 0.05$ ). The averaged RPKM values of each gene was  $\log_{2}$  transformed and further color transformed in heatmap.

**Aldh1a7 (Aldehyde dehydrogenase)**

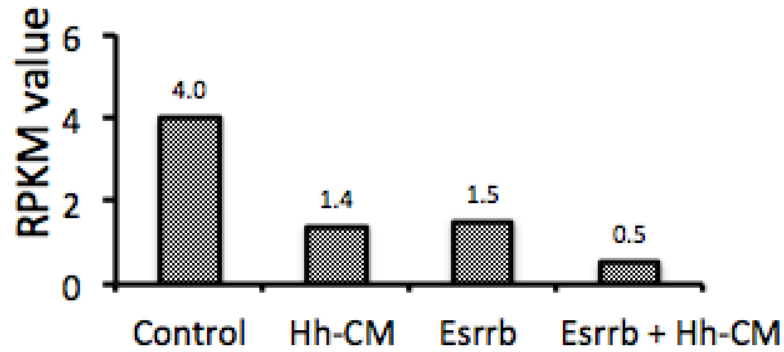

**Mt2 (Metallothionein 2)**

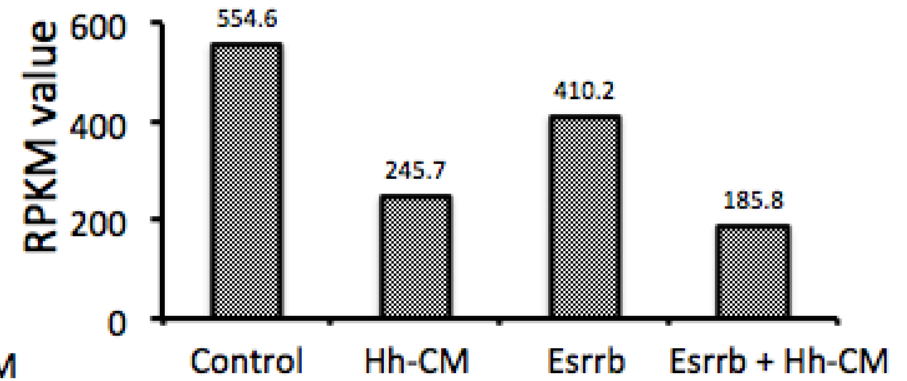

**Ankrd1 (Ankyrin repeat domain 1)**

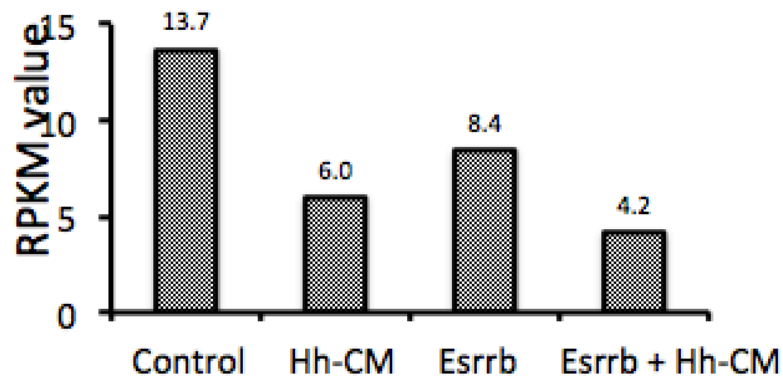

**Ism1 (U6 small nuclear RNA associated)**

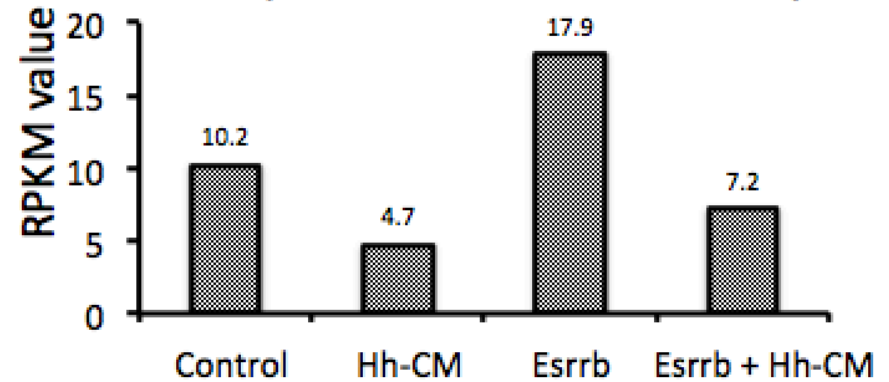

**Supplement Figure 6. Glucocorticoid Receptor related genes in response to Hh-CM and Esrrb**

4 genes having Glucocorticoid Receptor Response Element in their promoter regions were enriched from Hh responsive genes. All four of them, when treated with Hh-CM, were repressed, showed by decreased RPKM value compared Hh to Control. When Hh-CM was treated in the presence of Esrrb, the RPKM values of all 4 genes were further changed compared to Hh-CM treatment without Esrrb expressed.
